# Supplementary material for: Reversible interconversion and maintenance of mammary epithelial cell characteristics by the ligand-regulated EGFR system
Source: PubMed Central journal article supplement (PMC4735799; doi:10.1038/srep20209), 2016-02-02
Supplement: srep20209-s1.pdf [file srep20209-s1.pdf]

## Supplementary Materials

### **Reversible interconversion and maintenance of mammary epithelial cell characteristics by the ligand-regulated EGFR system**

Shinji Fukuda, Hisayo Nishida-Fukuda, Daisuke Nanba, Koh-ichi Nakashiro, Hironao Nakayama, Hiroyuki Kubota, Shigeki Higashiyama

#### Contents

|                                    |            |
|------------------------------------|------------|
| Supplementary Figure legends.....  | page 1-6   |
| Supplementary Figures 1 to 10..... | page 7-16  |
| Supplementary Table 1.....         | page 17-66 |
| Supplementary Table 2 to 5.....    | page 67-70 |

### **Supplementary Figure 1. Growth properties, migration speed and cluster formation of E-cells and A-cells**

- (a) Representative time-lapse images of MCF10A cultured in the presence (upper panels) or absence (lower panels) of recombinant EGF. MCF10A cells require recombinant EGF, and insulin and horse serum are not sufficient for their proliferation. Scale bar: 50  $\mu\text{m}$ .
- (b) Illustrations of the detailed process of cell culture. Parental MCF10A cells were cultured in parallel in the presence of EGF (10 ng/mL [1.8 nM]) or AREG (20 ng/mL [1.8 nM]). “Subculture” denotes the trypsinization and replating of the cells in new culture dishes every 3 days. After ligand-switching (subculture 1), we further repeated the subculture at least 3 times, that is, cells were kept for at least 12 days under the individual conditions. Then, the next round of ligand-switching was performed.
- (c) Cell number of parental MCF10A cultured in the presence of EGF (10 ng/mL) or AREG (20 ng/mL). The values in this graph were used to calculate the relative growth rate of MCF10A cultured with EGF or AREG (see Fig. 1b).
- (d) The migration speed of E-cells and A-cells calculated by the live imaging. \*:  $p < 0.05$ . See Supplementary Movies 1a and 1b.
- (e) An example of the quantification of cell clustering. Randomly selected Hoechst staining images (left panels) were binarized (middle panels), and the numbers of nuclei were counted (N0). In

this figure, the values of N0 in E-cells (upper middle panel) and A-cells (lower middle pane) are 241 and 216, respectively. Next, the areas of nucleus were artificially expanded by five pixels, and the numbers of clusters were counted (N5). In this figure, the values of N5 in E-cells (upper middle panel) and A-cells (lower middle pane) are 205 and 87, respectively. The nucleus-nucleus distance index was defined as the division of N5 by N0 (see Methods for further detail).

### **Supplementary Figure 2. Expression of EMT related molecules in E-cells and A-cells**

- (a) Left: RT-qPCR analysis of the *Twist1* and *ZEB2* expression. \*:  $p < 0.05$ . Right: Western blot analysis of the *Twist1* and *ZEB2* expression. NIH3T3 and human fibroblast cell lysates were used as positive controls.
- (b) The E-cadherin promoter assay. Cells were transfected with human E-cadherin promoter-firefly luciferase reporter plasmid and an internal Renilla luciferase plasmid, together with or without the *ZEB1* expression plasmid. After 24 h, luciferase activity was measured. Left: The E-cadherin promoter activity of A-cells was higher than that of E-cells. Right: The E-cadherin promoter activity was suppressed by the *ZEB1* overexpression in A-cells.
- (c) Left: RT-qPCR analysis of the mature *miR-200* family and *miR-205* expression. Right: The average Ct values of *miR-200* family and *miR-205* in E-cells and A-cells.
- (d) Western blot analysis of the change of the expression of EMT markers and EGFR after the ligand-switching from EGF to AREG. The left lane shows the expression of these proteins in E-cells (before the ligand-switching).
- (e) RT-qPCR analysis of the change of the mature *miR-200* family and *miR-205* expression after the ligand-switching from EGF to AREG. The left back bar shows the expression of these miRNAs in E-cells (before the ligand-switching).
- (f) Phase-contrast images of 4 independent clones established by limiting dilution (left panels). Then, the E-cells were converted into A-cells (middle panels), and further into E-cells (2nd) (right panels) by the ligand-switching. Scale bar: 100  $\mu\text{m}$ .
- (g) Western blot analysis of EMT related factors and EGFR in the 4 clones shown in (f).
- (h) Western blot analysis of E-cadherin and *ZEB1* in E-cells (2nd) and E-cells (3rd) before and after the long subculture. E-cells (2nd) and E-cells (3rd) at subculture 6 were maintained for the additional 6 passages. Then, the expression levels of EMT markers were compared between the early- (subculture 6) and the late- (subculture 12) passage populations.

**Supplementary Figure 3. Characterization of E-cells and A-cells by 3D assay and FACS analysis**

- (a) Left: The size distribution of cell clusters after 2-week culture on the reconstituted basement membrane. Right: The projected Z-stack images of cell clusters stained with fluorescent phalloidin (green) and Hoechst 33342 (blue). Maximum cross-section area was calculated by NIS-Elements (Nikon). Non-acini cell cluster (<math><500 \mu\text{m}^2</math>) composed of two to three cells, whereas acini-like cell cluster (2000-3000  $\mu\text{m}^2$ ) showed the well-organized structure.
- (b) Left: CD44<sup>hi</sup>/CD24<sup>neg</sup> cells and CD44<sup>lo</sup>/CD24<sup>pos</sup> cells in E-cells were separated by FACS. The sorted cells were immediately lysed and the expression of EMT related factors and EGFR were analyzed by western blotting. Right: Quantification of the acini formation efficiency of the sorted cells.
- (c) FACS analysis of the expression of EpCAM and CD49f in sequentially generated E-cells and A-cells.

**Supplementary Figure 4. Effects of the different concentrations of EGF and AREG on the acinus-formation**

- (a) The projected Z-stack images of acini formation assay using MCF10A cultured in the presence of various concentration of EGF and AREG. Cell clusters were stained with fluorescent phalloidin. Yellow arrow heads indicate cell clusters judged as non-acini. Scale bar: 100  $\mu\text{m}$ .
- (b) Expression of ZEB1 induced by EGF or AREG. Cells were deprived for EGF for 24 h. Then, cells were treated with EGF (10 ng/mL) or AREG (20 ng/mL). After the 24 h or 48 h incubation, cell lysates were prepared and subjected to the western blot analysis with anti-ZEB1 antibodies.

**Supplementary Figure 5. Roles of the ErbB family members in the phenotypic conversion**

- (a) Phase-contrast images of E-cells treated with AG1478 (1  $\mu\text{M}$ ) or DMSO after 48 h. Scale bar: 50  $\mu\text{m}$ .
- (b) RT-qPCR analyses of the knockdown of *ErbB2* (upper graph) and *ErbB3* (lower graph) expression in E-cells.
- (c) Western blot analyses of the effect of ErbB2 and ErbB3 knockdown on the expression of E-cadherin in E-cells. The knockdown of ErbB2 at the protein level was also shown. The expression of ErbB3 protein was not detected.
- (d) Phase-contrast images of E-cells transfected with control, *ErbB2* and *ErbB3* siRNA after 48 h. Scale bar: 50  $\mu\text{m}$ .

- (e) RT-qPCR analysis of *ErbB2*, *ErbB3* and *ErbB4* mRNA level in E-cells and A-cells. The expression of *ErbB4* mRNA was not detected. \*:  $p < 0.05$ .
- (f) Flow cytometric analysis of cell surface EGFR expression in E-cells and A-cells. The gray histogram signifies staining with isotype control.
- (g) Biotinylation assay for the detection of the cell surface EGFR in E-cells and A-cells. Under the steady state growth condition, cell surface proteins of E-cells and A-cells were labeled with 0.01% sulfo-NHS-biotin (Pierce) in 0.1 M HEPES and 0.15 M NaCl (pH 8.0) for 15 min at 4°C. Excess reagent was quenched and removed with ice-cold DMEM/F12 containing 20% horse serum. Cells were lysed in RIPA buffer and the lysates were subjected to immunoprecipitation using an antibody against EGFR. After the SDS-PAGE and western blotting, cell surface EGFR was detected by HRP-conjugated streptavidin (VECTOR LABORATORIES). Aliquots of cell lysates were analyzed by the standard western blotting using an anti-EGFR antibody.

**Supplementary Figure 6. Computational model of the EGFR phosphorylation**

- (a) Schematic overview of the EGFR model. A boxed arrow and a lined circle represent a directional biochemical reaction and a pool of substrate, respectively. “Re#” indicates the reaction number.
- (b) Reactions and rate constants in the EGFR model. “Re” indicates the reaction number.
- (c) Initial amounts of molecules in the EGFR model.
- (d) Scale factor of pEGFR in the EGFR model.
- (e) Ordinary differential equations in the EGFR model. “Re” indicates the reaction number.

**Supplementary Figure 7. Roles of EGFR-ERK and other signaling pathways in the regulation of E-cadherin expression**

- (a) Representative images of E-cells and A-cells cultured for 48 h in the presence of control IgG (4  $\mu\text{g}/\text{mL}$ ) or an E-cadherin neutralizing antibody (4  $\mu\text{g}/\text{mL}$ ). Cells were plated in the growth medium and cultured for 6 h. Then, the control or neutralizing antibodies were administrated. Image acquisition was started just after the addition of antibodies. See Supplementary Movies 2a to 2d. Scale bar: 50  $\mu\text{m}$ .
- (b) The migration speed of E-cells and A-cells in the presence of control IgG or an E-cadherin neutralizing antibody calculated by the live imaging. \*:  $p < 0.05$ .
- (c) RT-qPCR analysis of *E-cadherin* expression. E-cells were treated with 5  $\mu\text{M}$  U0126 (MEK1/2 inhibitor), 50  $\mu\text{M}$  PD98059 (MEK1/2 inhibitor), 50  $\mu\text{M}$  LY294002 (Akt inhibitor) or 10  $\mu\text{M}$



SB431542 (TGF $\beta$ R inhibitor). Total RNA was isolated after the 2-day culture. The *E-cadherin* mRNA levels of inhibitor-treated cells were expressed relative to that of DMSO-treated cells.

- (d) Western blot analysis of E-cadherin in E-cells treated with inhibitors as in (c).
- (e) Phase-contrast images of E-cells treated with DMSO or PD98059. After the 2-day culture, cell-cell contacts were established in the presence of PD98059 in EGF medium. Scale bar: 50  $\mu$ m.
- (f) Western blot analysis of E-cadherin and ZEB1 in E-cells transfected with siRNAs against MEK-ERK signaling molecules after the 2-day culture.
- (g) Immunofluorescent images of E-cells transfected with siRNAs against MEK-ERK signaling molecules. After the 2-day culture, cells were stained with an anti-E-cadherin antibody (green). Nuclei were stained with Hoechst 33342 (blue). Scale bar: 20  $\mu$ m.
- (h) RT-qPCR analysis of *TGF- $\beta$ 1*,  *$\beta$ 2* and  *$\beta$ 3* mRNA levels in E-cells and A-cells. \*:  $p < 0.05$ .
- (i) Western blot analysis of E-cadherin in recombinant TGF $\beta$ -treated A-cells. Ligand-switching from AREG to EGF significantly decreased the expression of E-cadherin, whereas no additional reduction was observed in the presence of recombinant TGF $\beta$ 1 (10 ng/mL) together with EGF in the 2-day culture.
- (j) Phase-contrast images of A-cells treated with recombinant TGF $\beta$ 1 (10 ng/mL) together with EGF or AREG. The 2-day TGF $\beta$ 1-treatment had no significant effect on the cell-cell adhesion. Scale bar: 100  $\mu$ m.

### **Supplementary Figure 8. Signal strength of EGFR activation**

- (a) Western blot analysis of the phosphorylation of EGFR (pY845, pY1045, pY1068, pY1086) by EGF (10 ng/mL) or AREG (20 ng/mL) in E-cells and A-cells. See Fig. 6a.
- (b) Quantification of the EGFR phosphorylation (pY1173). Data were obtained from 3 independent experiments, one of which was shown in Fig. 6a. The band intensities were normalized to that of pEGFR in E-cells treated with EGF for 10 min.
- (c) Quantification of the integrated signal strength of EGFR (pY1173) calculated from data shown in (b). The values were normalized to that of pEGFR in E-cells treated with EGF.
- (d) Phase-contrast and immunofluorescent images of A-cells treated with an EGFR inhibitor, AG1478. AREG-deprived A-cells were treated with EGF or AREG, allowing the immediate activation of EGFR signaling. After the 2 h incubation, AG1478 (125 nM) were administered. Cells were further cultured for 2 days and stained with E-cadherin antibodies (green). Nuclei were stained with Hoechst 33342 (blue). Scale bar: upper panel, 100  $\mu$ m; Lower panel, 50  $\mu$ m.

**Supplementary Figure 9. Effects of the expression of MEK1 mutants on acini formation**

- (a) The projected Z-stack images of acini formation assay using DN-MEK1 or CA-MEK1-expressing cells. Cell clusters were stained with fluorescent phalloidin. Yellow arrowheads indicate cell clusters judged as non-acini. Scale bar: 100  $\mu\text{m}$ .
- (b) The confocal images of cell clusters stained with fluorescent phalloidin (green) and Hoechst 33342 (blue). Note that acini of empty and DN-MEK1-expressing cells were well organized, whereas that of CA-MEK1-expressing cells showed luminal-filling phenotype. Scale bar: 50  $\mu\text{m}$ .

**Supplementary Figure 10. Validation of chemical inhibitors and siRNAs**

- (a) E-cells were treated with chemical inhibitors for 30 min at the following concentrations: U0126, 5  $\mu\text{M}$ ; PD98059, 50  $\mu\text{M}$ ; LY294002 50  $\mu\text{M}$ ; SB431542, 10  $\mu\text{M}$ . Cells were further treated with EGF (10 ng/mL) for 20 min, and then cell lysates were prepared for the western blot analysis. The effect of SB431542 was also shown in (b).
- (b) E-cells were treated with SB431542 (10  $\mu\text{M}$ ) for 30 min. Cells were further treated with recombinant TGF $\beta$  (10 ng/mL) for 20 min, and then cell lysates were prepared for the western blot analysis.
- (c) E-cells were reverse transfected with siRNA (20nM). After the 2-day culture, whole cell lysates were prepared for the western blot analysis. The expression levels of ZEB1 and  $\beta$ -actin in the same lysates were shown in Supplementary Fig. 7f.

# Supplementary Figure 1

(a)

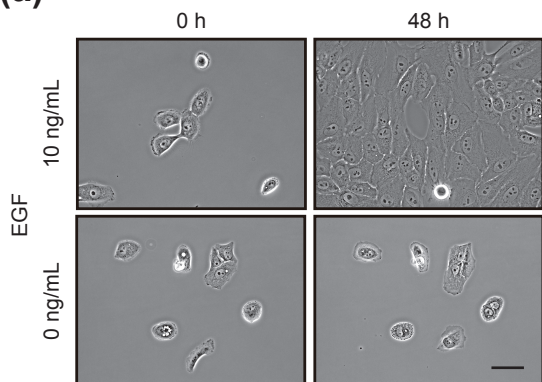

(c)

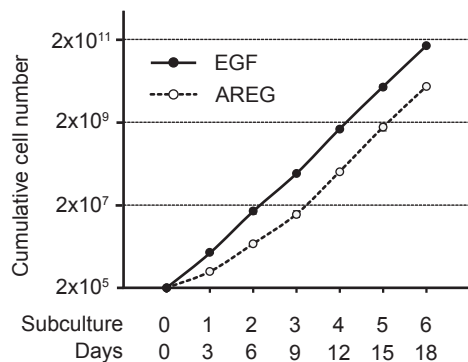

(b)

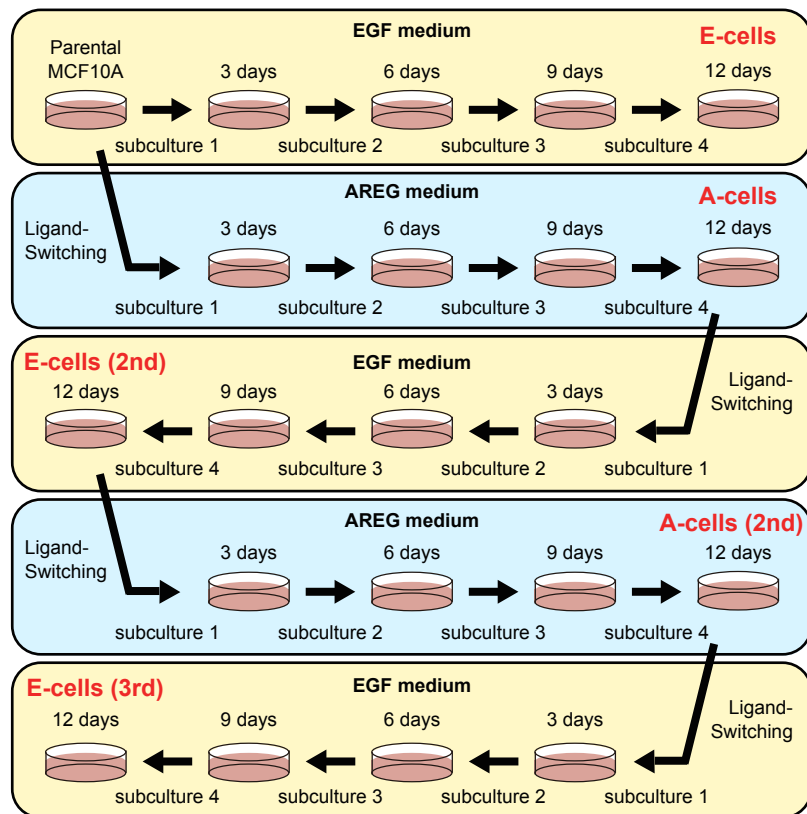

(d)

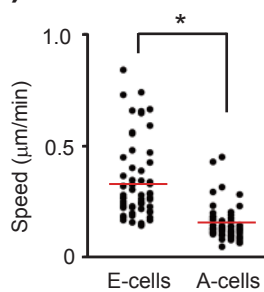

(e)

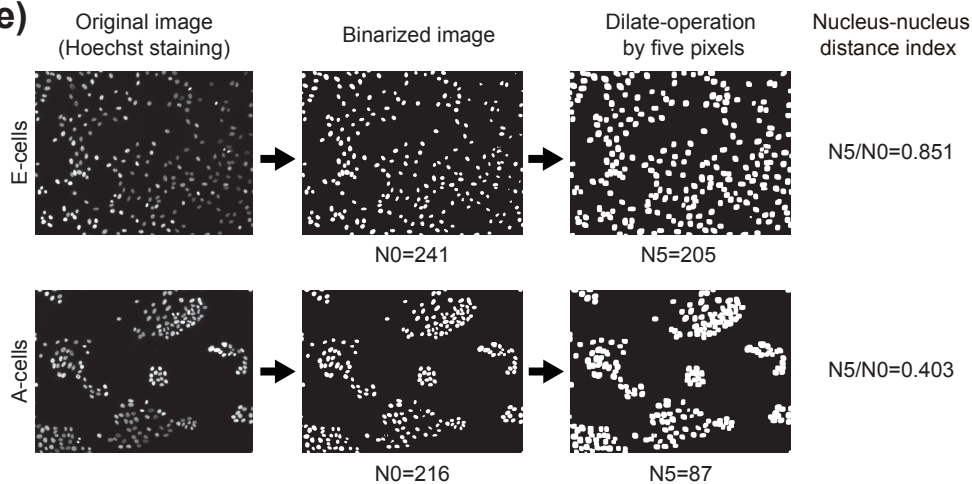

## Supplementary Figure 2

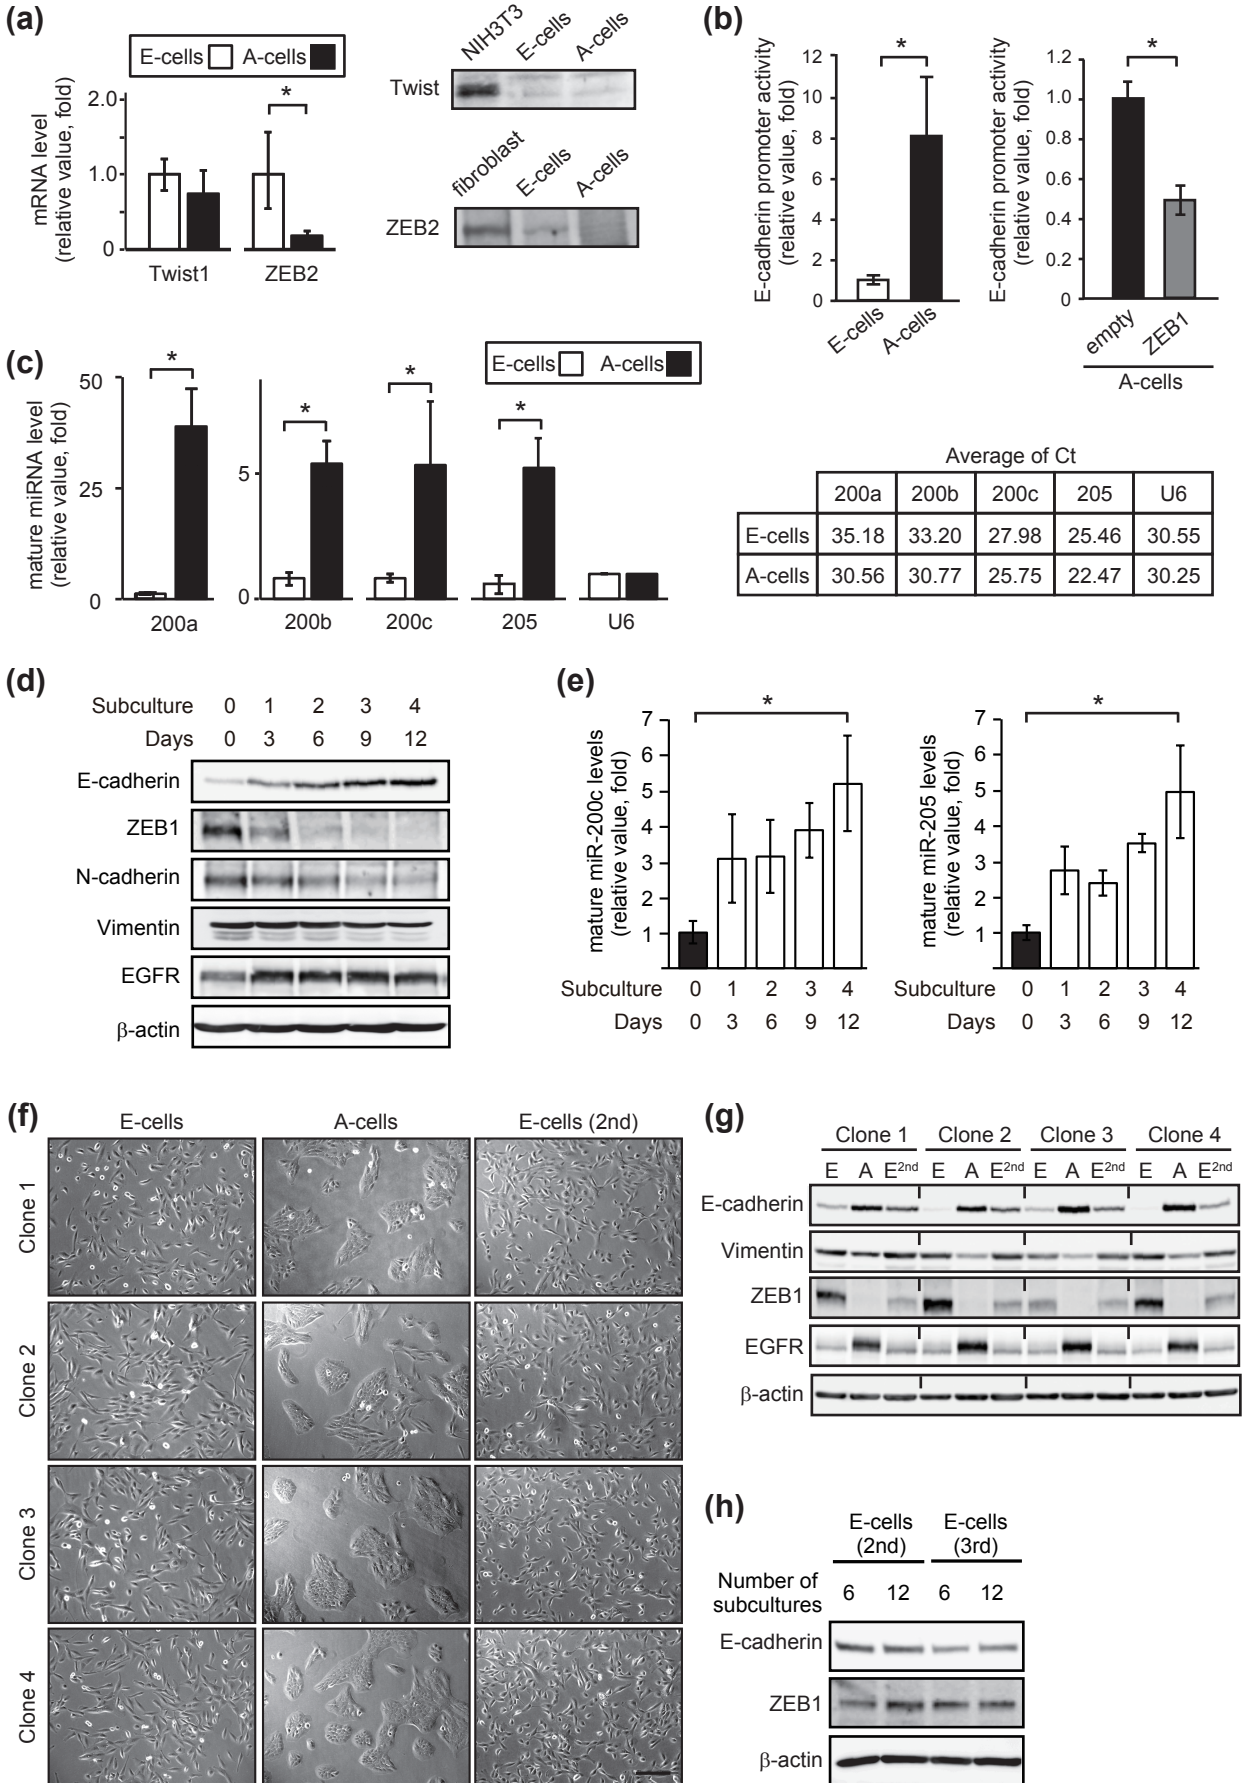

# Supplementary Figure 3

(a)

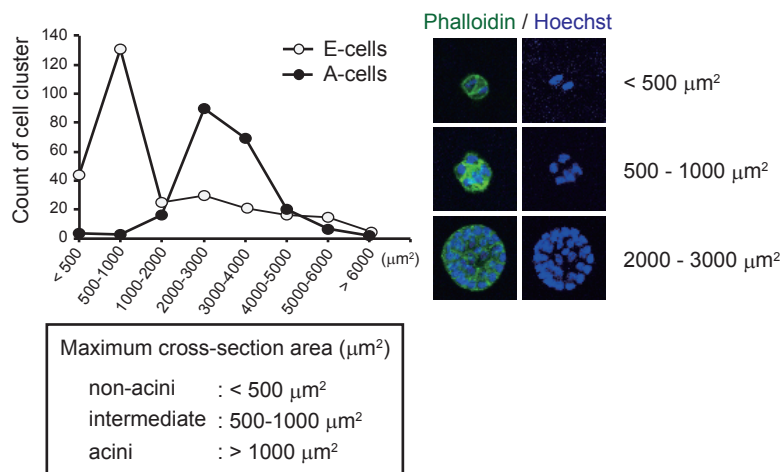

(b)

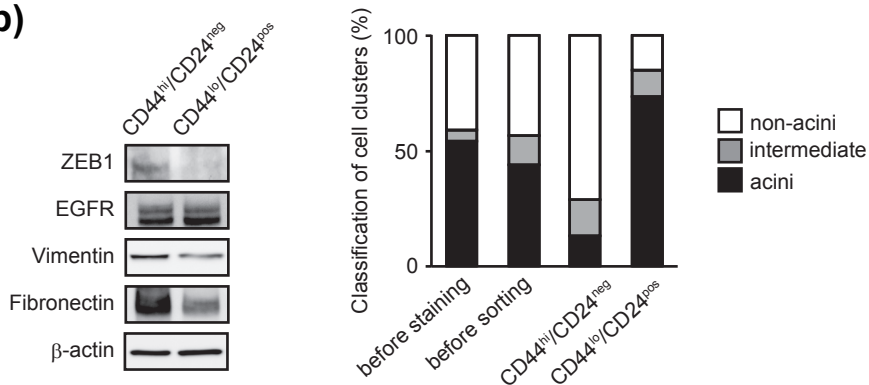

(c)

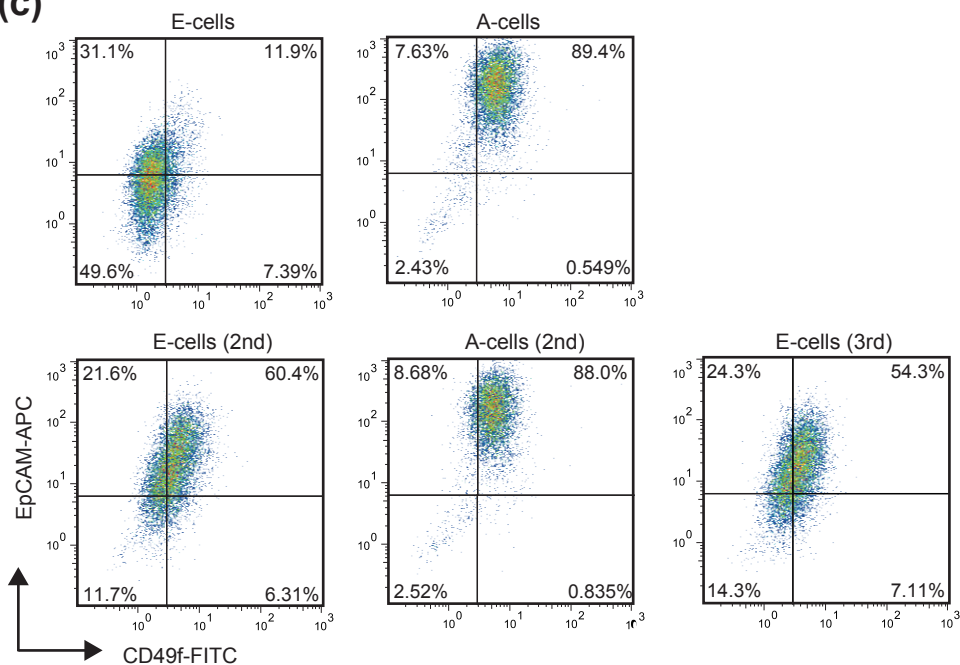

# Supplementary Figure 4

(a)

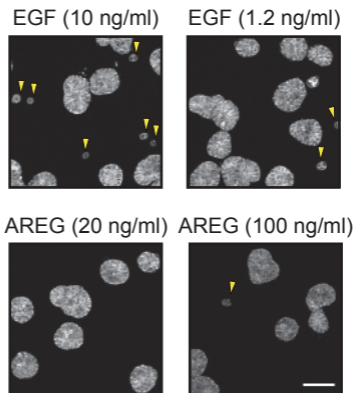

(b)

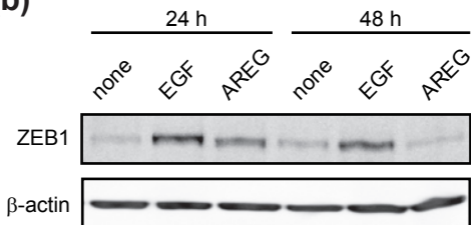

# Supplementary Figure 5

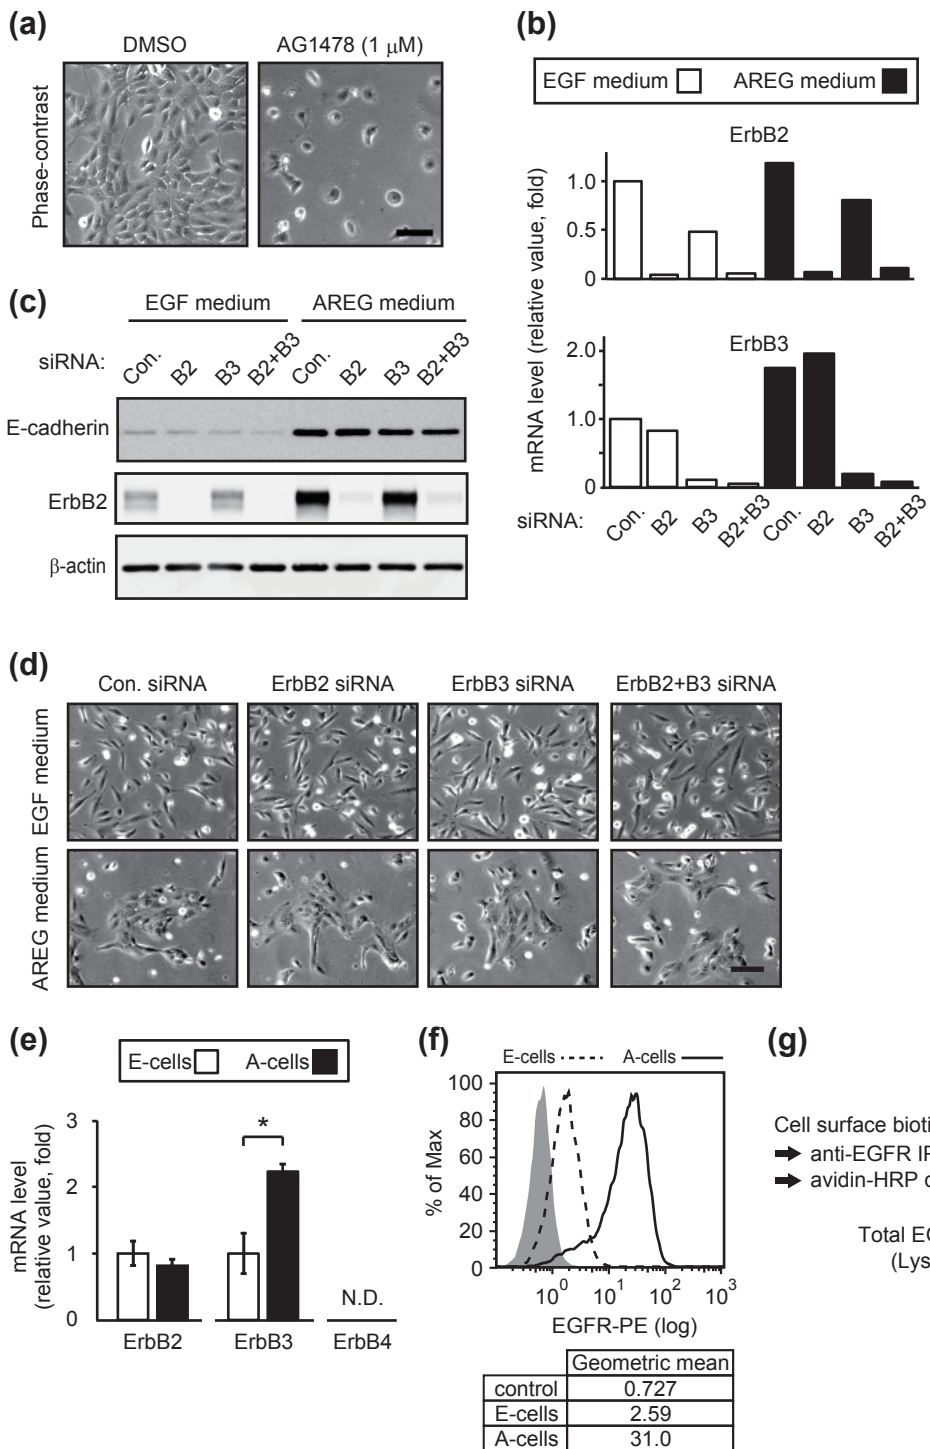

# Supplementary Figure 6

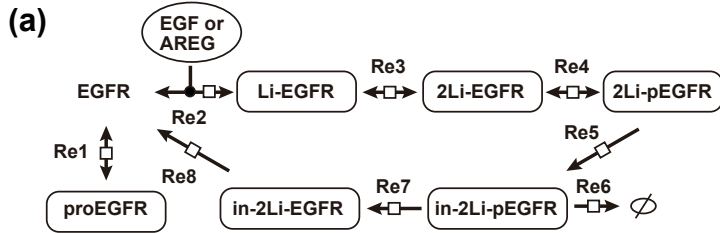

(b)

| Re | Reaction name                  | Reaction                                                                        | k1 (/min) | k2 (/min) |
|----|--------------------------------|---------------------------------------------------------------------------------|-----------|-----------|
| 1  | EGFR synthesis                 | $\text{proEGFR} \xrightleftharpoons{k_1} \text{EGFR}$                           | 0.0000002 |           |
| 2  | Ligand + EGFR                  | $\text{EGF} + \text{EGFR} \xrightleftharpoons[k_2]{k_1} \text{EGF-EGFR}$        | 46139     | 1042.0    |
|    |                                | $\text{AREG} + \text{EGFR} \xrightleftharpoons[k_2]{k_1} \text{AREG-EGFR}$      | 469.91    | 1042.0    |
| 3  | Li-EGFR + Li-EGFR              | $\text{Li-EGFR} + \text{Li-EGFR} \xrightleftharpoons[k_2]{k_1} \text{2Li-EGFR}$ | 0.01295   | 0.000011  |
| 4  | 2Li-EGFR phosphorylation       | $\text{2Li-EGFR} \xrightleftharpoons[k_2]{k_1} \text{2Li-pEGFR}$                | 565113    | 3.5697    |
| 5  | 2Li-pEGFR internalization      | $\text{2Li-pEGFR} \xrightarrow{k_1} \text{in-2Li-pEGFR}$                        | 0.94055   |           |
| 6  | in-2Li-pEGFR degradation       | $\text{in-2Li-pEGFR} \xrightarrow{k_1} \emptyset$                               | 1128.4    |           |
| 7  | in-2Li-pEGFR dephosphorylation | $\text{in-2Li-pEGFR} \xrightarrow{k_1} \text{in-2Li-EGFR}$                      | 535.30    |           |
| 8  | in-2Li-EGFR recycling          | $\text{in-2Li-EGFR} \xrightarrow{k_1} \text{EGFR}$                              | 0.000264  |           |

(c)

| name         | initial amounts         |
|--------------|-------------------------|
| proEGFR      | 0.29519 (E-cell, fixed) |
| EGFR         | 0.99884 (A-cell, fixed) |
| Li-EGFR      | 0                       |
| 2Li-EGFR     | 0                       |
| 2Li-pEGFR    | 0                       |
| in-2Li-pEGFR | 0                       |
| in-2Li-EGFR  | 0                       |
| Ligands      | 1 (fixed)               |

(d)

| name  | scale factor |
|-------|--------------|
| pEGFR | 45.9468      |

(e)

| Differential equation                                                                                                                       | Re |
|---------------------------------------------------------------------------------------------------------------------------------------------|----|
| $\frac{d[\text{EGFR}]}{dt} = k_1(\text{synthesis}) \cdot (\text{proEGFR} - [\text{EGFR}])$                                                  | 1  |
| $-k_1(\text{Li+EGFR}) \cdot [\text{Li}] \cdot [\text{EGFR}] + k_2(\text{LiEGFR-dess}) \cdot [\text{Li-EGFR}]$                               | 2  |
| $+ 2 \cdot k_1(\text{recycle}) \cdot [\text{in-2Li-EGFR}]$                                                                                  | 8  |
| $\frac{d[\text{Li-EGFR}]}{dt} = k_1(\text{Li+EGFR}) \cdot [\text{Li}] \cdot [\text{EGFR}] - k_2(\text{LiEGFR-dess}) \cdot [\text{Li-EGFR}]$ | 2  |
| $- 2 \cdot k_1(\text{2LiEGFR-syns}) \cdot [\text{Li-EGFR}] \cdot [\text{Li-EGFR}]$                                                          | 3  |
| $+ 2 \cdot k_2(\text{2LiEGFR-dess}) \cdot [\text{2Li-EGFR}]$                                                                                |    |
| $\frac{d[\text{2Li-EGFR}]}{dt} = k_1(\text{2LiEGFR-syns}) \cdot [\text{Li-EGFR}] \cdot [\text{Li-EGFR}]$                                    | 3  |
| $- k_2(\text{2LiEGFR-dess}) \cdot [\text{2Li-EGFR}]$                                                                                        |    |
| $- k_1(\text{2LiEGFR-phos}) \cdot [\text{2Li-EGFR}]$                                                                                        | 4  |
| $+ k_2(\text{2LiEGFR-dephos}) \cdot [\text{2Li-pEGFR}]$                                                                                     |    |
| $\frac{d[\text{2Li-pEGFR}]}{dt} = k_1(\text{2LiEGFR-phos}) \cdot [\text{2Li-EGFR}]$                                                         | 4  |
| $- k_2(\text{2LiEGFR-dephos}) \cdot [\text{2Li-pEGFR}]$                                                                                     |    |
| $- k_1(\text{2LiEGFR-inter}) \cdot [\text{2Li-pEGFR}]$                                                                                      | 5  |
| $\frac{d[\text{in-2Li-pEGFR}]}{dt} = k_1(\text{2LiEGFR-inter}) \cdot [\text{2Li-pEGFR}]$                                                    | 5  |
| $- k_1(\text{2LiEGFR-deg}) \cdot [\text{in-2Li-pEGFR}]$                                                                                     | 6  |
| $- k_1(\text{2LiEGFR-dephos}) \cdot [\text{in-2Li-pEGFR}]$                                                                                  | 7  |
| $\frac{d[\text{in-2Li-EGFR}]}{dt} = k_1(\text{2LiEGFR-dephos}) \cdot [\text{in-2Li-pEGFR}]$                                                 | 7  |
| $- k_1(\text{recycle}) \cdot [\text{in-2Li-EGFR}]$                                                                                          | 8  |



# Supplementary Figure 7

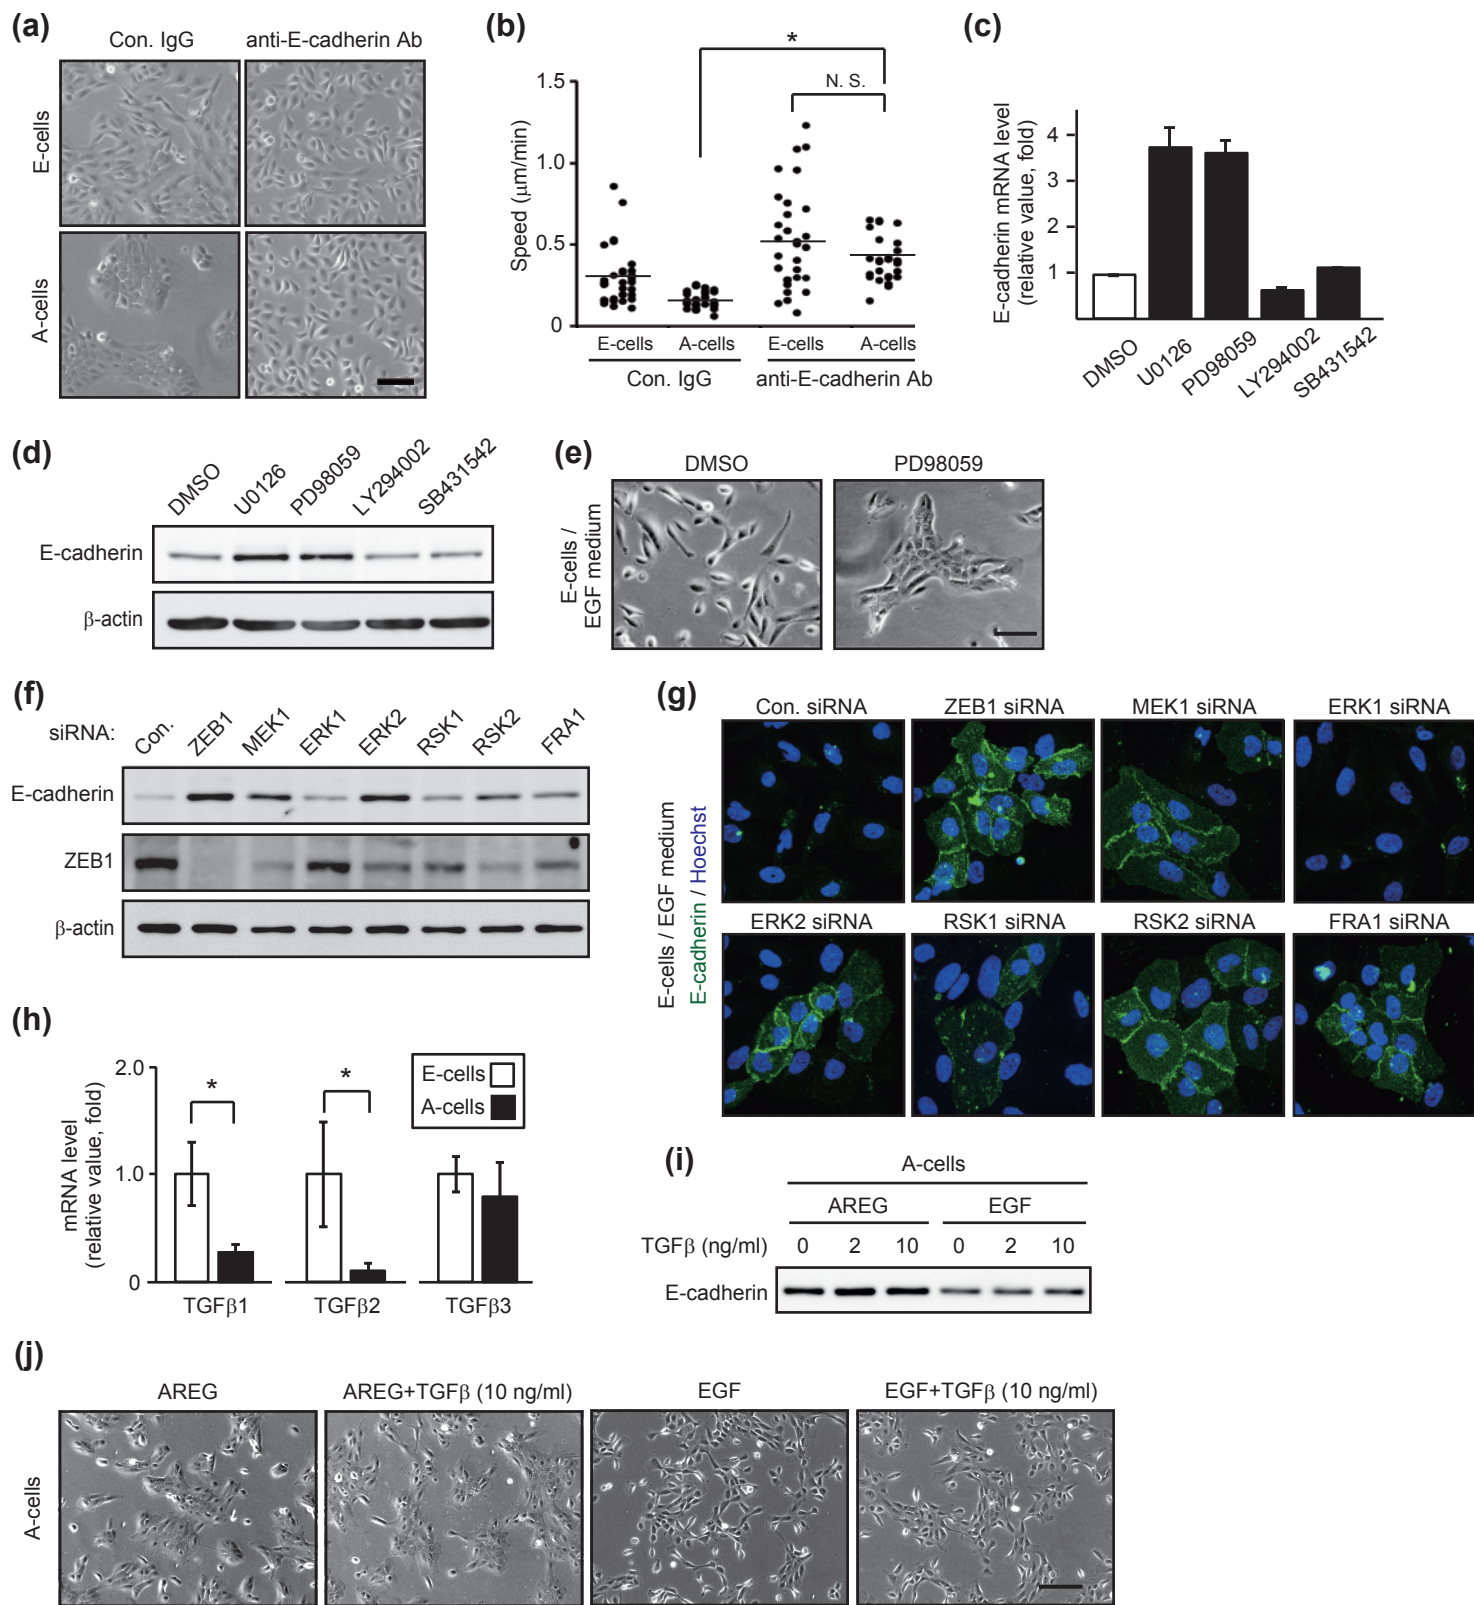

# Supplementary Figure 8

(a)

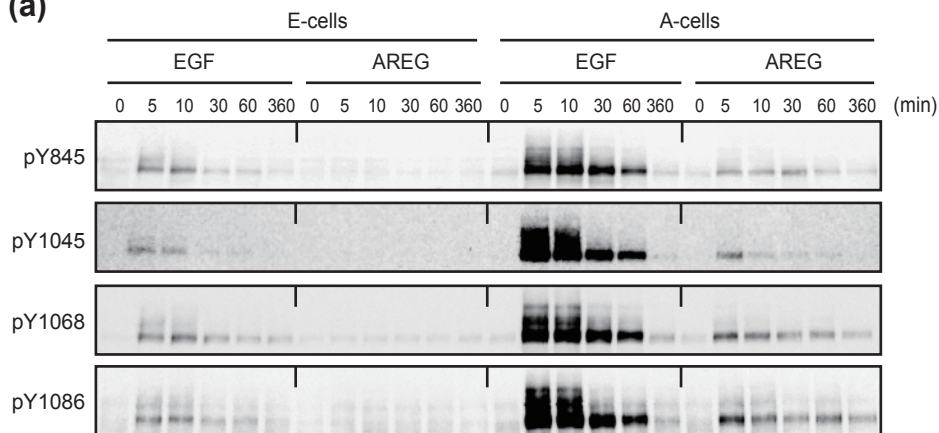

(b)

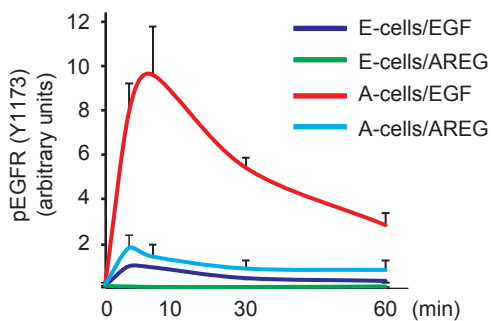

(c)

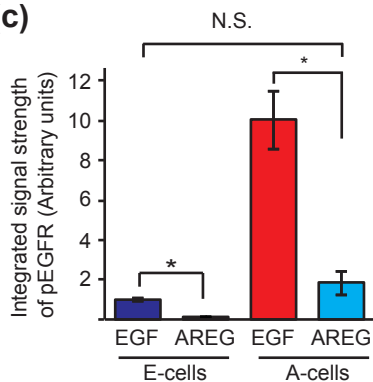

(d)

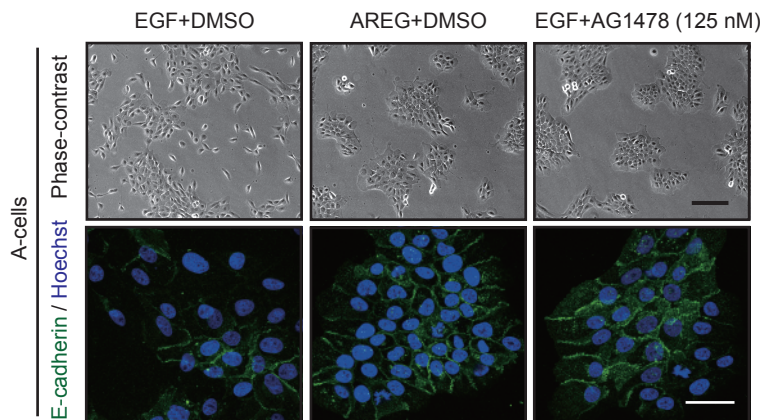

# Supplementary Figure 9

(a)

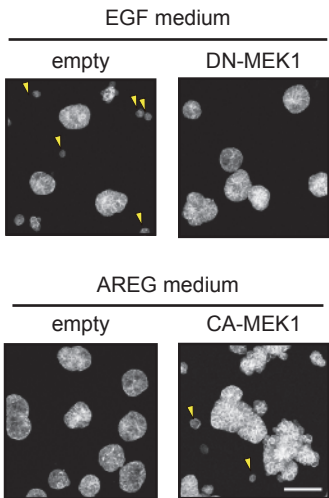

(b)

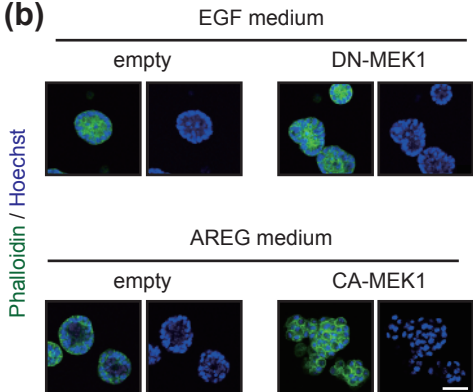



**Supplementary Table 1. Differently expressed genes between E-cells and A-cells**

| Probe Set ID | Entrez Gene | Gene Symbol | Unigene(Avadis) | Gene Title                                  | Fold change (A-cell/E-cell) | A-cell (normalized) | E-cell (normalized) |
|--------------|-------------|-------------|-----------------|---------------------------------------------|-----------------------------|---------------------|---------------------|
| 205064_at    | 6699        | SPRR1B      | Hs.1076         | small proline-rich protein 1B               | 113.06023                   | 3.4104738           | -3.4104736          |
| 204734_at    | 3866        | KRT15       | Hs.654570       | keratin 15                                  | 105.115234                  | 3.357914            | -3.357914           |
| 202489_s_at  | 5349        | FXYD3       | Hs.301350       | FXYD domain containing ion transport re     | 97.27018                    | 3.3019629           | -3.3019629          |
| 201131_s_at  | 999         | CDH1        | Hs.461086       | cadherin 1, type 1, E-cadherin (epithelial) | 96.99502                    | 3.2999191           | -3.2999196          |
| 219995_s_at  | 79755       | ZNF750      | Hs.653124       | zinc finger protein 750                     | 79.05819                    | 3.1524215           | -3.1524215          |
| 206165_s_at  | 9635        | CLCA2       | Hs.241551       | chloride channel accessory 2                | 72.03645                    | 3.085328            | -3.0853271          |
| 219476_at    | 79098       | C1orf116    | Hs.32417        | chromosome 1 open reading frame 116         | 70.63181                    | 3.0711231           | -3.0711231          |
| 217528_at    | 9635        | CLCA2       | Hs.241551       | chloride channel accessory 2                | 70.23337                    | 3.0670424           | -3.0670424          |
| 204614_at    | 5055        | SERPINB2    | Hs.594481       | serpin peptidase inhibitor, clade B (ovalbu | 68.56806                    | 3.0497322           | -3.0497327          |
| 235075_at    | 1830        | DSG3        | Hs.1925         | desmoglein 3                                | 59.988926                   | 2.953312            | -2.9533124          |
| 209863_s_at  | 8626        | TP63        | Hs.137569       | tumor protein p63                           | 59.960205                   | 2.9529667           | -2.9529667          |
| 206164_at    | 9635        | CLCA2       | Hs.241551       | chloride channel accessory 2                | 54.79605                    | 2.888               | -2.888              |
| 226755_at    | 642587      | LOC642587   | Hs.510543       | NPC-A-5                                     | 52.75201                    | 2.860577            | -2.860577           |
| 209351_at    | 3861        | KRT14       | Hs.654380       | keratin 14                                  | 45.420506                   | 2.752636            | -2.752636           |
| 206166_s_at  | 9635        | CLCA2       | Hs.241551       | chloride channel accessory 2                | 40.97192                    | 2.6782818           | -2.6782818          |
| 217272_s_at  | 5275        | SERPINB13   | Hs.241407       | serpin peptidase inhibitor, clade B (ovalbu | 37.369175                   | 2.6118884           | -2.6118884          |
| 225846_at    | 54845       | ESRP1       | Hs.487471       | epithelial splicing regulatory protein 1    | 36.235104                   | 2.5896578           | -2.5896583          |
| 205363_at    | 8424        | BBOX1       | Hs.591996       | butyrobetaine (gamma), 2-oxoglutarate di    | 35.89724                    | 2.5829005           | -2.5829003          |
| 209956_s_at  | 816         | CAMK2B      | Hs.351887       | calcium/calmodulin-dependent protein kir    | 34.55651                    | 2.5554428           | -2.5554428          |
| 213680_at    | 3854        | KRT6B       | Hs.708950       | keratin 6B                                  | 33.229218                   | 2.5271902           | -2.5271902          |
| 208650_s_at  | 100133941   | CD24        | Hs.644105       | CD24 molecule                               | 32.85841                    | 2.5190954           | -2.5190954          |
| 266_s_at     | 100133941   | CD24        | Hs.644105       | CD24 molecule                               | 32.418415                   | 2.5093708           | -2.5093708          |
| 211361_s_at  | 5275        | SERPINB13   | Hs.241407       | serpin peptidase inhibitor, clade B (ovalbu | 31.365746                   | 2.485559            | -2.4855592          |
| 227492_at    | 4950        | OCLN        | Hs.592605       | occludin                                    | 29.598793                   | 2.4437332           | -2.4437332          |
| 219909_at    | 79148       | MMP28       | Hs.380710       | matrix metalloproteinase 28                 | 28.982853                   | 2.428564            | -2.4285636          |
| 239430_at    | 374918      | IGFL1       | Hs.546554       | IGF-like family member 1                    | 28.296389                   | 2.411273            | -2.411273           |
| 216379_x_at  | 100133941   | CD24        | Hs.644105       | CD24 molecule                               | 27.436884                   | 2.3890219           | -2.3890228          |
| 203780_at    | 10205       | MPZL2       | Hs.116651       | myelin protein zero-like 2                  | 27.098757                   | 2.3800774           | -2.3800774          |
| 239381_at    | 5650        | KLK7        | Hs.151254       | kallikrein-related peptidase 7              | 27.06459                    | 2.3791676           | -2.379167           |
| 202935_s_at  | 6662        | SOX9        | Hs.647409       | SRY (sex determining region Y)-box 9        | 26.986841                   | 2.3770924           | -2.377092           |
| 205157_s_at  | 3872        | KRT17       | Hs.2785         | keratin 17                                  | 25.99094                    | 2.349969            | -2.349968           |
| 226701_at    | 2702        | GJA5        | Hs.447968       | gap junction protein, alpha 5, 40kDa        | 25.14329                    | 2.3260508           | -2.326051           |
| 213796_at    | 6698        | SPRR1A      | Hs.46320        | small proline-rich protein 1A               | 24.859955                   | 2.3178759           | -2.3178759          |
| 208651_x_at  | 100133941   | CD24        | Hs.644105       | CD24 molecule                               | 24.151915                   | 2.2970324           | -2.2970333          |
| 228865_at    | 79098       | C1orf116    | Hs.32417        | chromosome 1 open reading frame 116         | 23.507147                   | 2.2775135           | -2.277514           |
| 239273_s_at  | 79148       | MMP28       | Hs.380710       | matrix metalloproteinase 28                 | 22.750011                   | 2.2538977           | -2.2538977          |
| 207935_s_at  | 3860        | KRT13       | Hs.654550       | keratin 13                                  | 22.342386                   | 2.2408557           | -2.240856           |
| 219127_at    | 79170       | PRR15L      | Hs.368260       | proline rich 15-like                        | 22.327822                   | 2.240385            | -2.2403855          |
| 41469_at     | 5266        | PI3         | Hs.112341       | peptidase inhibitor 3, skin-derived         | 22.283476                   | 2.2389512           | -2.2389512          |
| 209771_x_at  | 100133941   | CD24        | Hs.644105       | CD24 molecule                               | 22.17811                    | 2.2355318           | -2.2355328          |

|              |                             |           |                                           |           |           |            |
|--------------|-----------------------------|-----------|-------------------------------------------|-----------|-----------|------------|
| 218677_at    | 57402 S100A14               | Hs.288998 | S100 calcium binding protein A14          | 22.04266  | 2.2311134 | -2.231113  |
| 209925_at    | 4950 OCLN                   | Hs.592605 | occludin                                  | 21.86333  | 2.2252207 | -2.2252207 |
| 205595_at    | 1830 DSG3                   | Hs.1925   | desmoglein 3                              | 21.691313 | 2.2195225 | -2.219523  |
| 1558846_at   | 119548 PNLIPRP3             | Hs.276724 | pancreatic lipase-related protein 3       | 21.54901  | 2.214775  | -2.2147746 |
| 204379_s_at  | 2261 FGFR3                  | Hs.1420   | fibroblast growth factor receptor 3       | 21.50425  | 2.213275  | -2.213275  |
| 209772_s_at  | 100133941 CD24              | Hs.644105 | CD24 molecule                             | 20.990026 | 2.195816  | -2.195816  |
| 1552477_a_at | 3664 IRF6                   | Hs.724724 | interferon regulatory factor 6            | 20.92995  | 2.1937485 | -2.1937485 |
| 202488_s_at  | 5349 FXYD3                  | Hs.301350 | FXYD domain containing ion transport re   | 20.775105 | 2.1883917 | -2.1883922 |
| 227949_at    | 116154 PHACTR3              | Hs.473218 | phosphatase and actin regulator 3         | 19.265543 | 2.1339755 | -2.1339755 |
| 220979_s_at  | 81849 ST6GALNAC5            | Hs.303609 | ST6 (alpha-N-acetyl-neuraminyl-2,3-beta-  | 18.550995 | 2.1067123 | -2.1067126 |
| 1555942_a_at | 642587 LOC642587            | Hs.510543 | NPC-A-5                                   | 18.321516 | 2.0977335 | -2.0977335 |
| 212236_x_at  | 3872 KRT17                  | Hs.2785   | keratin 17                                | 18.269632 | 2.0956879 | -2.0956879 |
| 232056_at    | 8796 SCEL                   | Hs.534699 | sciellin                                  | 18.1791   | 2.0921044 | -2.0921047 |
| 202936_s_at  | 6662 SOX9                   | Hs.647409 | SRY (sex determining region Y)-box 9      | 18.088142 | 2.0884862 | -2.0884862 |
| 215465_at    | 26154 ABCA12                | Hs.134585 | ATP-binding cassette, sub-family A (ABC   | 18.012173 | 2.0854502 | -2.0854502 |
| 233011_at    | 301 ANXA1                   | Hs.494173 | Annexin A1                                | 17.778233 | 2.0760202 | -2.0760198 |
| 203691_at    | 5266 PI3                    | Hs.112341 | peptidase inhibitor 3, skin-derived       | 17.608765 | 2.0691109 | -2.0691109 |
| 212657_s_at  | 3557 IL1RN                  | Hs.81134  | interleukin 1 receptor antagonist         | 17.327919 | 2.0575132 | -2.0575132 |
| 209301_at    | 760 CA2                     | Hs.155097 | carbonic anhydrase II                     | 17.013138 | 2.0442886 | -2.0442886 |
| 239272_at    | 79148 MMP28                 | Hs.380710 | matrix metalloproteinase 28               | 16.978327 | 2.0428114 | -2.042811  |
| 229385_s_at  | 257000 PLAC2                | Hs.515575 | placenta-specific 2 (non-protein coding)  | 16.917315 | 2.0402145 | -2.040214  |
| 202790_at    | 1366 CLDN7                  | Hs.513915 | claudin 7                                 | 16.283426 | 2.0126657 | -2.0126667 |
| 208607_s_at  | 6288 /// 6289 SAA1 /// SAA2 | Hs.1955   | serum amyloid A1 /// serum amyloid A2     | 15.975038 | 1.9988737 | -1.9988737 |
| 222830_at    | 29841 GRHL1                 | Hs.418493 | grainyhead-like 1 (Drosophila)            | 15.973158 | 1.9987888 | -1.9987888 |
| 206884_s_at  | 8796 SCEL                   | Hs.534699 | sciellin                                  | 15.73711  | 1.9880495 | -1.9880493 |
| 202481_at    | 9249 DHRS3                  | Hs.289347 | dehydrogenase/reductase (SDR family) m    | 15.336386 | 1.9694433 | -1.9694433 |
| 202597_at    | 3664 IRF6                   | Hs.724724 | interferon regulatory factor 6            | 14.692777 | 1.9385176 | -1.9385176 |
| 230356_at    |                             | Hs.290255 |                                           | 14.510425 | 1.9295092 | -1.9295087 |
| 203779_s_at  | 10205 MPZL2                 | Hs.116651 | myelin protein zero-like 2                | 14.385869 | 1.9232903 | -1.9232903 |
| 205778_at    | 5650 KLK7                   | Hs.151254 | kallikrein-related peptidase 7            | 14.186403 | 1.9132185 | -1.9132185 |
| 235146_at    | 57458 TMCC3                 | Hs.370410 | transmembrane and coiled-coil domain fa   | 14.132443 | 1.9104695 | -1.9104695 |
| 209114_at    | 10103 TSPAN1                | Hs.38972  | tetraspanin 1                             | 14.03453  | 1.9054546 | -1.9054542 |
| 226847_at    | 10468 FST                   | Hs.9914   | follistatin                               | 13.957185 | 1.9014683 | -1.9014678 |
| 241994_at    | 7498 XDH                    | Hs.250    | xanthine dehydrogenase                    | 13.932061 | 1.9001684 | -1.9001684 |
| 226899_at    | 219699 UNC5B                | Hs.522997 | unc-5 homolog B (C. elegans)              | 13.607411 | 1.8831606 | -1.8831601 |
| 1554997_a_at | 5743 PTGS2                  | Hs.196384 | prostaglandin-endoperoxide synthase 2 (p  | 13.452795 | 1.874917  | -1.874917  |
| 208190_s_at  | 51599 LSR                   | Hs.466507 | lipolysis stimulated lipoprotein receptor | 13.219918 | 1.8623209 | -1.8623204 |
| 211122_s_at  | 6373 CXCL11                 | Hs.632592 | chemokine (C-X-C motif) ligand 11         | 13.132793 | 1.8575511 | -1.8575509 |
| 209309_at    | 563 AZGP1                   | Hs.546239 | alpha-2-glycoprotein 1, zinc-binding      | 12.585568 | 1.8268495 | -1.826849  |
| 222168_at    |                             | Hs.675520 |                                           | 12.074377 | 1.7969384 | -1.7969384 |
| 200953_s_at  | 894 CCND2                   | Hs.376071 | cyclin D2                                 | 12.005017 | 1.7927828 | -1.7927828 |
| 238967_at    |                             | Hs.686016 |                                           | 11.953605 | 1.7896872 | -1.7896867 |
| 239155_at    | 1525 CXADR                  | Hs.634837 | coxsackie virus and adenovirus receptor   | 11.814796 | 1.7812614 | -1.7812614 |

|              |           |                     |                  |                                             |            |           |            |
|--------------|-----------|---------------------|------------------|---------------------------------------------|------------|-----------|------------|
| 232116_at    | 57822     | GRHL3               | Hs.657920        | grainyhead-like 3 (Drosophila)              | 11.80143   | 1.7804451 | -1.7804446 |
| 210118_s_at  | 3552      | IL1A                | Hs.1722          | interleukin 1, alpha                        | 11.713887  | 1.775074  | -1.775074  |
| 204748_at    | 5743      | PTGS2               | Hs.196384        | prostaglandin-endoperoxide synthase 2 (p    | 11.698767  | 1.7741423 | -1.7741423 |
| 204469_at    | 5803      | PTPRZ1              | Hs.489824        | protein tyrosine phosphatase, receptor-ty   | 11.224713  | 1.7443032 | -1.7443035 |
| 229764_at    | 285386    | TPRG1               | Hs.338851        | tumor protein p63 regulated 1               | 11.150573  | 1.7395229 | -1.7395229 |
| 224650_at    | 114569    | MAL2                | Hs.201083        | mal, T-cell differentiation protein 2       | 11.129673  | 1.7381697 | -1.7381697 |
| 219121_s_at  | 54845     | ESRP1               | Hs.487471        | epithelial splicing regulatory protein 1    | 11.112258  | 1.73704   | -1.73704   |
| 232202_at    |           |                     | Hs.152423        |                                             | 11.009635  | 1.7303476 | -1.7303472 |
| 203180_at    | 220       | ALDH1A3             | Hs.459538        | aldehyde dehydrogenase 1 family, membe      | 10.962884  | 1.7272778 | -1.7272778 |
| 203797_at    | 7447      | VSNL1               | Hs.444212        | visinin-like 1                              | 10.714766  | 1.7107639 | -1.7107644 |
| 239370_at    | 100505633 | LOC100505633        |                  | hypothetical LOC100505633                   | 10.6250105 | 1.7046962 | -1.7046962 |
| 208153_s_at  | 2196      | FAT2                | Hs.591255        | FAT tumor suppressor homolog 2 (Drosoj      | 10.605037  | 1.7033386 | -1.7033391 |
| 203638_s_at  | 2263      | FGFR2               | Hs.533683        | fibroblast growth factor receptor 2         | 10.488574  | 1.695373  | -1.6953735 |
| 202917_s_at  | 6279      | S100A8              | Hs.416073        | S100 calcium binding protein A8             | 10.47337   | 1.6943274 | -1.6943264 |
| 229296_at    | 100506119 | /// 10 LOC100506119 | /// LOC100508342 | hypothetical LOC100506119 /// hypotheti     | 10.387902  | 1.6884165 | -1.688416  |
| 236279_at    |           |                     | Hs.659129        |                                             | 10.310342  | 1.6830101 | -1.6830101 |
| 214456_x_at  | 6288      | /// 6289 SAA1       | /// SAA2 Hs.1955 | serum amyloid A1 /// serum amyloid A2       | 10.288786  | 1.6815004 | -1.6815004 |
| 235957_at    | 23426     | GRIP1               | Hs.505946        | glutamate receptor interacting protein 1    | 10.257629  | 1.6793127 | -1.6793127 |
| 229147_at    | 166824    | RASSF6              | Hs.590920        | Ras association (RalGDS/AF-6) domain f      | 9.813721   | 1.6473999 | -1.6474004 |
| 201839_s_at  | 4072      | EPCAM               | Hs.542050        | epithelial cell adhesion molecule           | 9.760563   | 1.6434822 | -1.6434822 |
| 231928_at    | 54626     | HES2                | Hs.118727        | hairy and enhancer of split 2 (Drosophila)  | 9.740566   | 1.642003  | -1.6420026 |
| 229616_s_at  | 196996    | GRAMD2              | Hs.596332        | GRAM domain containing 2                    | 9.712218   | 1.6399002 | -1.6399007 |
| 206515_at    | 4051      | CYP4F3              | Hs.106242        | cytochrome P450, family 4, subfamily F, j   | 9.655054   | 1.635642  | -1.6356423 |
| 230518_at    | 10205     | MPZL2               | Hs.116651        | myelin protein zero-like 2                  | 9.610107   | 1.6322765 | -1.632276  |
| 237086_at    | 3169      | FOXA1               | Hs.163484        | Forkhead box A1                             | 9.553587   | 1.6280212 | -1.6280212 |
| 210404_x_at  | 816       | CAMK2B              | Hs.351887        | calcium/calmodulin-dependent protein kir    | 9.494279   | 1.6235294 | -1.623529  |
| 203798_s_at  | 7447      | VSNL1               | Hs.444212        | visinin-like 1                              | 9.484126   | 1.6227574 | -1.6227574 |
| 212841_s_at  | 8495      | PPFIBP2             | Hs.655714        | PTPRF interacting protein, binding protei   | 9.017077   | 1.5863299 | -1.5863299 |
| 205916_at    | 6278      | S100A7              | Hs.112408        | S100 calcium binding protein A7             | 8.975734   | 1.583015  | -1.583015  |
| 207655_s_at  | 29760     | BLNK                | Hs.665244        | B-cell linker                               | 8.861427   | 1.5737696 | -1.5737696 |
| 235182_at    | 140862    | ISM1                | Hs.559353        | isthmin 1 homolog (zebrafish)               | 8.472448   | 1.5413895 | -1.5413895 |
| 218182_s_at  | 9076      | CLDN1               | Hs.439060        | claudin 1                                   | 8.402713   | 1.5354276 | -1.5354276 |
| 202411_at    | 3429      | IFI27               | Hs.532634        | interferon, alpha-inducible protein 27      | 8.3442335  | 1.5303898 | -1.5303898 |
| 243386_at    | 54897     | CASZ1               | Hs.439894        | castor zinc finger 1                        | 8.33387    | 1.5294933 | -1.5294933 |
| 209800_at    | 3868      | KRT16               | Hs.655160        | keratin 16                                  | 8.314394   | 1.5278053 | -1.5278058 |
| 222549_at    | 9076      | CLDN1               | Hs.439060        | claudin 1                                   | 8.051525   | 1.504631  | -1.504631  |
| 203535_at    | 6280      | S100A9              | Hs.112405        | S100 calcium binding protein A9             | 7.9324694  | 1.493885  | -1.493885  |
| 228320_x_at  | 92558     | CCDC64              | Hs.369763        | coiled-coil domain containing 64            | 7.925119   | 1.4932165 | -1.493216  |
| 204584_at    | 3897      | L1CAM               | Hs.522818        | L1 cell adhesion molecule                   | 7.8959427  | 1.4905558 | -1.4905558 |
| 209792_s_at  | 5655      | KLK10               | Hs.275464        | kallikrein-related peptidase 10             | 7.837589   | 1.4852052 | -1.4852047 |
| 221872_at    | 5918      | RARRES1             | Hs.131269        | retinoic acid receptor responder (tazaroter | 7.8117967  | 1.4828272 | -1.4828272 |
| 1552478_a_at | 3664      | IRF6                | Hs.724724        | interferon regulatory factor 6              | 7.7943363  | 1.4812131 | -1.4812131 |
| 232060_at    | 4919      | ROR1                | Hs.654491        | receptor tyrosine kinase-like orphan recep  | 7.748477   | 1.4769564 | -1.4769564 |

|             |                 |               |           |                                             |           |           |            |
|-------------|-----------------|---------------|-----------|---------------------------------------------|-----------|-----------|------------|
| 231022_at   | 4950            | OCLN          | Hs.592605 | occludin                                    | 7.7286544 | 1.4751086 | -1.4751086 |
| 205870_at   | 624             | BDKRB2        | Hs.724899 | bradykinin receptor B2                      | 7.6752954 | 1.4701109 | -1.4701114 |
| 219225_at   | 79605           | PGBD5         | Hs.520463 | piggyBac transposable element derived 5     | 7.655703  | 1.4682674 | -1.4682674 |
| 219856_at   | 79098           | C1orf116      | Hs.32417  | chromosome 1 open reading frame 116         | 7.5649877 | 1.4596691 | -1.4596686 |
| 213839_at   | 79789           | CLMN          | Hs.301478 | calmin (calponin-like, transmembrane)       | 7.432681  | 1.4469414 | -1.4469414 |
| 232164_s_at | 83481           | EPPK1         | Hs.200412 | epiplakin 1                                 | 7.3545804 | 1.4393215 | -1.4393215 |
| 203821_at   | 1839            | HBEGF         | Hs.799    | heparin-binding EGF-like growth factor      | 7.307786  | 1.4347172 | -1.4347172 |
| 204533_at   | 3627            | CXCL10        | Hs.632586 | chemokine (C-X-C motif) ligand 10           | 7.276357  | 1.4316082 | -1.4316082 |
| 202712_s_at | 1159 /// 548596 | CKMT1A /// CK | Hs.425633 | creatine kinase, mitochondrial 1A /// creat | 7.107085  | 1.414629  | -1.414629  |
| 225016_at   | 147495          | APCDD1        | Hs.293274 | adenomatous polyposis coli down-regulat     | 7.1049128 | 1.4144082 | -1.4144087 |
| 201147_s_at | 7078            | TIMP3         | Hs.644633 | TIMP metalloproteinase inhibitor 3          | 7.097545  | 1.41366   | -1.41366   |
| 223541_at   | 3038            | HAS3          | Hs.592069 | hyaluronan synthase 3                       | 7.0627804 | 1.4101181 | -1.4101181 |
| 225759_x_at | 79789           | CLMN          | Hs.301478 | calmin (calponin-like, transmembrane)       | 7.0459323 | 1.4083953 | -1.4083953 |
| 203256_at   | 1001            | CDH3          | Hs.191842 | cadherin 3, type 1, P-cadherin (placental)  | 6.967039  | 1.4002733 | -1.4002724 |
| 232165_at   | 83481           | EPPK1         | Hs.200412 | epiplakin 1                                 | 6.9609213 | 1.3996391 | -1.3996391 |
| 202890_at   | 9053            | MAP7          | Hs.486548 | microtubule-associated protein 7            | 6.9006495 | 1.3933659 | -1.3933663 |
| 210147_at   | 419             | ART3          | Hs.24976  | ADP-ribosyltransferase 3                    | 6.899147  | 1.393209  | -1.393209  |
| 204971_at   | 1475            | CSTA          | Hs.518198 | cystatin A (stefin A)                       | 6.8683906 | 1.389986  | -1.389986  |
| 218736_s_at | 54873           | PALMD         | Hs.483993 | palmdelphin                                 | 6.77121   | 1.3797069 | -1.3797069 |
| 204455_at   | 667             | DST           | Hs.604915 | dystonin                                    | 6.705918  | 1.3727179 | -1.3727169 |
| 206683_at   | 7718            | ZNF165        | Hs.535177 | zinc finger protein 165                     | 6.6385818 | 1.3654375 | -1.3654375 |
| 204351_at   | 6286            | S100P         | Hs.2962   | S100 calcium binding protein P              | 6.5557246 | 1.3563776 | -1.3563776 |
| 206008_at   | 7051            | TGM1          | Hs.508950 | transglutaminase 1 (K polypeptide epider    | 6.5176826 | 1.3521795 | -1.3521795 |
| 205819_at   | 8685            | MARCO         | Hs.67726  | macrophage receptor with collagenous str    | 6.4509015 | 1.3447504 | -1.3447504 |
| 205014_at   | 9982            | FGFBP1        | Hs.1690   | fibroblast growth factor binding protein 1  | 6.4338884 | 1.342845  | -1.3428459 |
| 236262_at   | 79812           | MMRN2         | Hs.524479 | multimerin 2                                | 6.4238195 | 1.3417158 | -1.3417156 |
| 203394_s_at | 3280            | HES1          | Hs.250666 | hairy and enhancer of split 1, (Drosophila  | 6.4152446 | 1.3407526 | -1.3407516 |
| 203904_x_at | 3732            | CD82          | Hs.527778 | CD82 molecule                               | 6.4056463 | 1.3396721 | -1.3396721 |
| 239089_at   |                 |               | Hs.714938 |                                             | 6.3928757 | 1.3382325 | -1.3382325 |
| 202525_at   | 5652            | PRSS8         | Hs.75799  | protease, serine, 8                         | 6.3378596 | 1.3319979 | -1.3319979 |
| 232082_x_at | 6707            | SPRR3         | Hs.139322 | small proline-rich protein 3                | 6.336984  | 1.3318982 | -1.3318982 |
| 232914_s_at | 54843           | SYTL2         | Hs.369520 | synaptotagmin-like 2                        | 6.322898  | 1.3302932 | -1.3302927 |
| 219836_at   | 79413           | ZBED2         | Hs.136912 | zinc finger, BED-type containing 2          | 6.28768   | 1.3262639 | -1.3262639 |
| 238439_at   | 118932          | ANKRD22       | Hs.217484 | ankyrin repeat domain 22                    | 6.269     | 1.3241177 | -1.3241177 |
| 228910_at   |                 |               | Hs.634153 |                                             | 6.2167387 | 1.318079  | -1.318079  |
| 202037_s_at | 6422            | SFRP1         | Hs.213424 | secreted frizzled-related protein 1         | 6.2030735 | 1.3164921 | -1.3164911 |
| 209719_x_at | 6317            | SERPINB3      | Hs.227948 | serpin peptidase inhibitor, clade B (ovalbi | 6.1424804 | 1.3094106 | -1.3094108 |
| 226374_at   | 1525            | CXADR         | Hs.634837 | coxsackie virus and adenovirus receptor     | 6.1177487 | 1.3065004 | -1.3065004 |
| 220289_s_at | 55057           | AIMIL         | Hs.128738 | absent in melanoma 1-like                   | 6.0970097 | 1.3040509 | -1.3040509 |
| 223484_at   | 84419           | C15orf48      | Hs.112242 | chromosome 15 open reading frame 48         | 6.0464025 | 1.2980385 | -1.2980385 |
| 228570_at   | 121551          | BTBD11        | Hs.271272 | BTB (POZ) domain containing 11              | 6.011296  | 1.293838  | -1.293838  |
| 210163_at   | 6373            | CXCL11        | Hs.632592 | chemokine (C-X-C motif) ligand 11           | 5.9699774 | 1.2888627 | -1.2888627 |
| 205768_s_at | 11001           | SLC27A2       | Hs.720807 | solute carrier family 27 (fatty acid transp | 5.962874  | 1.2880039 | -1.2880039 |



|             |                   |                                  |                                          |                                             |           |            |            |
|-------------|-------------------|----------------------------------|------------------------------------------|---------------------------------------------|-----------|------------|------------|
| 203642_s_at | 22837             | COBL1                            | Hs.470457                                | COBL-like 1                                 | 5.8788633 | 1.2777691  | -1.2777681 |
| 209794_at   | 9901              | SRGAP3                           | Hs.654743                                | SLIT-ROBO Rho GTPase activating prot        | 5.8473015 | 1.2738857  | -1.2738853 |
| 1570585_at  | 196264            | MPZL3                            | Hs.15396                                 | myelin protein zero-like 3                  | 5.827899  | 1.2714882  | -1.2714877 |
| 241990_at   | 171177            | RHOV                             | Hs.447901                                | ras homolog gene family, member V           | 5.819176  | 1.2704077  | -1.2704072 |
| 203021_at   | 6590              | SLPI                             | Hs.517070                                | secretory leukocyte peptidase inhibitor     | 5.8180933 | 1.2702732  | -1.2702732 |
| 239148_at   | 91862             | MARVELD3                         | Hs.513706                                | MARVEL domain containing 3                  | 5.7904296 | 1.2668352  | -1.2668352 |
| 213050_at   | 23242             | COBL                             | Hs.99141                                 | cordon-bleu homolog (mouse)                 | 5.772834  | 1.2646399  | -1.2646399 |
| 200951_s_at | 894               | CCND2                            | Hs.376071                                | cyclin D2                                   | 5.6981373 | 1.2552452  | -1.2552452 |
| 1555551_at  | 5268              | SERPINB5                         | Hs.55279                                 | serpin peptidase inhibitor, clade B (ovalbi | 5.667059  | 1.2512999  | -1.2513003 |
| 229242_at   |                   |                                  | Hs.23349                                 |                                             | 5.6661167 | 1.2511802  | -1.2511802 |
| 218261_at   | 10053             | AP1M2                            | Hs.18894                                 | adaptor-related protein complex 1, mu 2 s   | 5.665109  | 1.2510519  | -1.2510519 |
| 227235_at   | 2982              | GUCY1A3                          | Hs.24258                                 | guanylate cyclase 1, soluble, alpha 3       | 5.6512938 | 1.2492905  | -1.2492907 |
| 206392_s_at | 5918              | RARRES1                          | Hs.131269                                | retinoic acid receptor responder (tazaroter | 5.627615  | 1.2462621  | -1.2462616 |
| 204681_s_at | 9771              | RAPGEF5                          | Hs.174768                                | Rap guanine nucleotide exchange factor (    | 5.5984607 | 1.2425151  | -1.2425151 |
| 209735_at   | 9429              | ABCG2                            | Hs.480218                                | ATP-binding cassette, sub-family G (WH      | 5.590615  | 1.2415032  | -1.2415037 |
| 219010_at   | 55765             | C1orf106                         | Hs.518997                                | chromosome 1 open reading frame 106         | 5.589634  | 1.2413769  | -1.2413769 |
| 224724_at   | 55959             | SULF2                            | Hs.162016                                | sulfatase 2                                 | 5.5789657 | 1.2399988  | -1.2399988 |
| 235955_at   | 153562            | MARVELD2                         | Hs.724697                                | MARVEL domain containing 2                  | 5.556535  | 1.2370925  | -1.237093  |
| 203726_s_at | 3909              | LAMA3                            | Hs.436367                                | laminin, alpha 3                            | 5.49175   | 1.2286329  | -1.2286329 |
| 203917_at   | 1525              | CXADR                            | Hs.634837                                | coxsackie virus and adenovirus receptor     | 5.485703  | 1.2278385  | -1.227838  |
| 202036_s_at | 6422              | SFRP1                            | Hs.213424                                | secreted frizzled-related protein 1         | 5.4833627 | 1.2275305  | -1.2275305 |
| 228933_at   | 4810              | NHS                              | Hs.201623                                | Nance-Horan syndrome (congenital catar      | 5.4745293 | 1.2263675  | -1.2263675 |
| 226907_at   | 81706             | PPP1R14C                         | Hs.486798                                | protein phosphatase 1, regulatory (inhibit  | 5.469787  | 1.2257423  | -1.2257423 |
| 201150_s_at | 7078              | TIMP3                            | Hs.644633                                | TIMP metallopeptidase inhibitor 3           | 5.459283  | 1.2243557  | -1.2243557 |
| 226225_at   | 4163              | MCC                              | Hs.593171                                | mutated in colorectal cancers               | 5.4297132 | 1.220438   | -1.220438  |
| 209260_at   | 2810              | SFN                              | Hs.523718                                | stratifin                                   | 5.4000826 | 1.2164907  | -1.2164907 |
| 235937_at   | 4950              | OCLN                             | Hs.592605                                | occludin                                    | 5.3680882 | 1.212204   | -1.2122045 |
| 65517_at    | 10053             | AP1M2                            | Hs.18894                                 | adaptor-related protein complex 1, mu 2 s   | 5.3230457 | 1.2061262  | -1.2061257 |
| 222859_s_at | 27071             | DAPP1                            | Hs.436271                                | dual adaptor of phosphotyrosine and 3-ph    | 5.2842793 | 1.2008533  | -1.2008533 |
| 202035_s_at | 6422              | SFRP1                            | Hs.213424                                | secreted frizzled-related protein 1         | 5.2513757 | 1.1963482  | -1.1963472 |
| 205769_at   | 11001             | SLC27A2                          | Hs.720807                                | solute carrier family 27 (fatty acid transp | 5.2378635 | 1.1944895  | -1.194489  |
| 203395_s_at | 3280              | HES1                             | Hs.250666                                | hairy and enhancer of split 1, (Drosophila  | 5.2310834 | 1.1935549  | -1.1935549 |
| 204836_at   | 2731              | GLDC                             | Hs.584238                                | glycine dehydrogenase (decarboxylating)     | 5.2166214 | 1.1915579  | -1.1915579 |
| 213478_at   | 23254             | KAZ                              | Hs.368823                                | kazrin                                      | 5.211658  | 1.1908712  | -1.1908712 |
| 215125_s_at | 54575 /// 54576 / | UGT1A1 /// UGT1A10 /// UGT1A3 // | UDP glucuronosyltransferase 1 family, pc | 5.1853733                                   | 1.1872239 | -1.1872239 |            |
| 231033_at   |                   |                                  | Hs.557559                                |                                             | 5.1789093 | 1.1863241  | -1.1863241 |
| 211483_x_at | 816               | CAMK2B                           | Hs.351887                                | calcium/calmodulin-dependent protein kir    | 5.176356  | 1.1859684  | -1.1859684 |
| 1562440_at  | 9175              | MAP3K13                          | Hs.656069                                | Mitogen-activated protein kinase kinase k   | 5.1673355 | 1.1847105  | -1.18471   |
| 219181_at   | 9388              | LIPG                             | Hs.465102                                | lipase, endothelial                         | 5.1239247 | 1.1786251  | -1.1786242 |
| 224762_at   | 347735            | SERINC2                          | Hs.270655                                | serine incorporator 2                       | 5.116157  | 1.1775303  | -1.1775303 |
| 231932_at   | 80342             | TRAF3IP3                         | Hs.147434                                | TRAF3 interacting protein 3                 | 5.101413  | 1.1754484  | -1.1754484 |
| 220030_at   | 55359             | STYK1                            | Hs.24979                                 | serine/threonine/tyrosine kinase 1          | 5.0809107 | 1.1725435  | -1.1725435 |
| 226535_at   | 3694              | ITGB6                            | Hs.470399                                | integrin, beta 6                            | 5.0740247 | 1.171565   | -1.1715655 |

|              |           |              |           |                                             |           |           |            |
|--------------|-----------|--------------|-----------|---------------------------------------------|-----------|-----------|------------|
| 206125_s_at  | 11202     | KLK8         | Hs.104570 | kallikrein-related peptidase 8              | 5.067373  | 1.170619  | -1.170619  |
| 219987_at    | 100288413 | LOC100288413 | Hs.363087 | Similar to Uncharacterized protein LP905    | 5.057904  | 1.1692696 | -1.16927   |
| 216905_s_at  | 6768      | ST14         | Hs.504315 | suppression of tumorigenicity 14 (colon c   | 5.045608  | 1.1675138 | -1.1675143 |
| 204636_at    | 1308      | COL17A1      | Hs.117938 | collagen, type XVII, alpha 1                | 5.018475  | 1.1636248 | -1.1636243 |
| 229030_at    | 388743    | CAPN8        | Hs.291487 | calpain 8                                   | 5.016968  | 1.1634078 | -1.1634078 |
| 205220_at    | 8843      | GPR109B      | Hs.458425 | G protein-coupled receptor 109B             | 4.9844136 | 1.1587119 | -1.1587119 |
| 227184_at    | 5724      | PTAFR        | Hs.433540 | platelet-activating factor receptor         | 4.9439497 | 1.152832  | -1.152832  |
| 236009_at    | 64065     | PERP         | Hs.201446 | PERP, TP53 apoptosis effector               | 4.9234734 | 1.1498384 | -1.149838  |
| 222877_at    |           |              | Hs.660596 |                                             | 4.910191  | 1.1478896 | -1.1478896 |
| 209758_s_at  | 8076      | MFAP5        | Hs.512842 | microfibrillar associated protein 5         | 4.899699  | 1.1463466 | -1.1463466 |
| 201148_s_at  | 7078      | TIMP3        | Hs.644633 | TIMP metalloproteinase inhibitor 3          | 4.880301  | 1.1434851 | -1.1434851 |
| 211778_s_at  | 58495     | OVOL2        | Hs.710157 | ovo-like 2 (Drosophila)                     | 4.848451  | 1.138762  | -1.138762  |
| 91826_at     | 54869     | EPS8L1       | Hs.438862 | EPS8-like 1                                 | 4.8453627 | 1.1383023 | -1.1383023 |
| 205709_s_at  | 1040      | CDS1         | Hs.654899 | CDP-diacylglycerol synthase (phosphatid     | 4.840167  | 1.1375284 | -1.1375284 |
| 230828_at    | 196996    | GRAMD2       | Hs.596332 | GRAM domain containing 2                    | 4.8377647 | 1.1371703 | -1.1371703 |
| 210845_s_at  | 5329      | PLAUR        | Hs.466871 | plasminogen activator, urokinase receptor   | 4.827311  | 1.1356096 | -1.1356101 |
| 213056_at    | 23150     | FRMD4B       | Hs.709671 | FERM domain containing 4B                   | 4.824955  | 1.1352577 | -1.1352577 |
| 212070_at    | 9289      | GPR56        | Hs.513633 | G protein-coupled receptor 56               | 4.81524   | 1.1338043 | -1.1338034 |
| 222746_s_at  | 54836     | BSPRY        | Hs.614517 | B-box and SPRY domain containing            | 4.80452   | 1.1321964 | -1.132196  |
| 225864_at    | 157638    | FAM84B       | Hs.724597 | family with sequence similarity 84, memb    | 4.7839856 | 1.1291065 | -1.1291065 |
| 1553982_a_at | 338382    | RAB7B        | Hs.534612 | RAB7B, member RAS oncogene family           | 4.7483745 | 1.1237168 | -1.1237168 |
| 202286_s_at  | 4070      | TACSTD2      | Hs.23582  | tumor-associated calcium signal transduc    | 4.7386947 | 1.1222448 | -1.1222448 |
| 201149_s_at  | 7078      | TIMP3        | Hs.644633 | TIMP metalloproteinase inhibitor 3          | 4.734017  | 1.1215324 | -1.1215324 |
| 222858_s_at  | 27071     | DAPP1        | Hs.436271 | dual adaptor of phosphotyrosine and 3-ph    | 4.7155585 | 1.1187143 | -1.1187143 |
| 38037_at     | 1839      | HBEGF        | Hs.799    | heparin-binding EGF-like growth factor      | 4.703284  | 1.1168342 | -1.1168342 |
| 201195_s_at  | 8140      | SLC7A5       | Hs.513797 | solute carrier family 7 (cationic amino aci | 4.666237  | 1.1111298 | -1.1111298 |
| 205067_at    | 3553      | IL1B         | Hs.126256 | interleukin 1, beta                         | 4.65095   | 1.1087627 | -1.1087627 |
| 235141_at    | 153562    | MARVELD2     | Hs.724697 | MARVEL domain containing 2                  | 4.635101  | 1.1063004 | -1.1063004 |
| 202283_at    | 5176      | SERPINF1     | Hs.532768 | serpin peptidase inhibitor, clade F (alpha- | 4.633777  | 1.1060944 | -1.1060944 |
| 201428_at    | 1364      | CLDN4        | Hs.699253 | claudin 4                                   | 4.6112814 | 1.1025839 | -1.1025839 |
| 216918_s_at  | 667       | DST          | Hs.604915 | dystonin                                    | 4.5665855 | 1.0955582 | -1.0955577 |
| 220468_at    | 80117     | ARL14        | Hs.287702 | ADP-ribosylation factor-like 14             | 4.5493107 | 1.092824  | -1.092824  |
| 206204_at    | 2888      | GRB14        | Hs.411881 | growth factor receptor-bound protein 14     | 4.5385785 | 1.0911202 | -1.0911202 |
| 241482_at    |           |              |           |                                             | 4.5235095 | 1.0887213 | -1.0887213 |
| 211002_s_at  | 23650     | TRIM29       | Hs.504115 | tripartite motif-containing 29              | 4.508609  | 1.0863409 | -1.0863414 |
| 219489_s_at  | 64359     | NXN          | Hs.527989 | nucleoredoxin                               | 4.503734  | 1.0855608 | -1.0855608 |
| 219938_s_at  | 9050      | PSTPIP2      | Hs.567384 | proline-serine-threonine phosphatase inte   | 4.503222  | 1.0854788 | -1.0854788 |
| 221042_s_at  | 79789     | CLMN         | Hs.301478 | calmin (calponin-like, transmembrane)       | 4.4940643 | 1.0840101 | -1.0840106 |
| 207102_at    | 6718      | AKR1D1       | Hs.201667 | aldo-keto reductase family 1, member D1     | 4.455738  | 1.0778322 | -1.0778322 |
| 218807_at    | 10451     | VAV3         | Hs.267659 | vav 3 guanine nucleotide exchange factor    | 4.4062843 | 1.0697813 | -1.0697813 |
| 203037_s_at  | 9788      | MTSS1        | Hs.336994 | metastasis suppressor 1                     | 4.3775887 | 1.0650682 | -1.0650682 |
| 228977_at    | 729680    | LOC729680    | Hs.130652 | hypothetical protein LOC729680              | 4.3745055 | 1.0645599 | -1.0645599 |
| 210827_s_at  | 1999      | ELF3         | Hs.67928  | E74-like factor 3 (ets domain transcriptior | 4.3744125 | 1.0645447 | -1.0645447 |

|             |                  |           |                                             |           |            |             |
|-------------|------------------|-----------|---------------------------------------------|-----------|------------|-------------|
| 243276_at   | 259173 ALS2CL    | Hs.517937 | ALS2 C-terminal like                        | 4.3711376 | 1.0640044  | -1.0640044  |
| 202005_at   | 6768 ST14        | Hs.504315 | suppression of tumorigenicity 14 (colon c   | 4.3688874 | 1.063633   | -1.063633   |
| 206393_at   | 7136 TNNI2       | Hs.523403 | troponin I type 2 (skeletal, fast)          | 4.3584557 | 1.0619087  | -1.0619082  |
| 241470_x_at |                  | Hs.247150 |                                             | 4.3409834 | 1.059011   | -1.059011   |
| 206109_at   | 2523 FUT1        | Hs.69747  | fucosyltransferase 1 (galactoside 2-alpha-  | 4.339642  | 1.0587878  | -1.0587883  |
| 201286_at   | 6382 SDC1        | Hs.224607 | syndecan 1                                  | 4.3359103 | 1.0581675  | -1.0581675  |
| 241355_at   | 55806 HR         | Hs.272367 | hairless homolog (mouse)                    | 4.2926717 | 1.0509377  | -1.0509381  |
| 224901_at   | 79966 SCD5       | Hs.379191 | stearoyl-CoA desaturase 5                   | 4.2741976 | 1.0478268  | -1.0478268  |
| 203287_at   | 3898 LAD1        | Hs.519035 | ladinin 1                                   | 4.2446504 | 1.0428228  | -1.0428228  |
| 229144_at   | 23254 KAZ        | Hs.368823 | kazrin                                      | 4.238175  | 1.0417213  | -1.0417218  |
| 228153_at   | 255488 RNF144B   | Hs.148741 | ring finger protein 144B                    | 4.2269764 | 1.039813   | -1.039813   |
| 235924_at   |                  | Hs.561511 |                                             | 4.221307  | 1.0388451  | -1.0388446  |
| 202504_at   | 23650 TRIM29     | Hs.504115 | tripartite motif-containing 29              | 4.213307  | 1.0374765  | -1.0374765  |
| 240633_at   | 285489 DOK7      | Hs.122110 | docking protein 7                           | 4.1974006 | 1.0347481  | -1.0347481  |
| 230266_at   | 338382 RAB7B     | Hs.534612 | RAB7B, member RAS oncogene family           | 4.1791    | 1.0315962  | -1.0315962  |
| 201998_at   | 6480 ST6GAL1     | Hs.207459 | ST6 beta-galactosamide alpha-2,6-sialyltr   | 4.1682754 | 1.0297251  | -1.0297256  |
| 244107_at   |                  |           |                                             | 4.14847   | 1.0262899  | -1.0262895  |
| 232181_at   | 133522 PPARGC1B  | Hs.483816 | peroxisome proliferator-activated receptor  | 4.1451097 | 1.0257053  | -1.0257049  |
| 203571_s_at | 10974 C10orf116  | Hs.642660 | chromosome 10 open reading frame 116        | 4.1310782 | 1.0232592  | -1.0232592  |
| 226185_at   | 1040 CDS1        | Hs.654899 | CDP-diacylglycerol synthase (phosphatid:    | 4.0949774 | 1.0169277  | -1.0169277  |
| 226069_at   | 144165 PRICKLE1  | Hs.720221 | prickle homolog 1 (Drosophila)              | 4.094785  | 1.0168939  | -1.0168939  |
| 205780_at   | 638 BIK          | Hs.475055 | BCL2-interacting killer (apoptosis-induci   | 4.087978  | 1.0156937  | -1.0156937  |
| 244829_at   | 221718 C6orf218  | Hs.173337 | chromosome 6 open reading frame 218         | 4.081557  | 1.0145597  | -1.0145597  |
| 232277_at   | 64078 SLC28A3    | Hs.591877 | solute carrier family 28 (sodium-coupled 1  | 4.06561   | 1.0117359  | -1.0117359  |
| 204542_at   | 10610 ST6GALNAC2 | Hs.592105 | ST6 (alpha-N-acetyl-neuraminy-2,3-beta-     | 4.0593786 | 1.0106292  | -1.0106297  |
| 236470_at   |                  | Hs.606038 |                                             | 4.048271  | 1.0086527  | -1.0086532  |
| 238778_at   | 143098 MPP7      | Hs.499159 | membrane protein, palmitoylated 7 (MAC      | 4.037175  | 1.0066733  | -1.0066729  |
| 213230_at   | 30850 CDR2L      | Hs.78358  | cerebellar degeneration-related protein 2-l | 4.0296764 | 1.005332   | -1.005332   |
| 218806_s_at | 10451 VAV3       | Hs.267659 | vav 3 guanine nucleotide exchange factor    | 3.9808824 | 0.9965439  | -0.99654436 |
| 201510_at   | 1999 ELF3        | Hs.67928  | E74-like factor 3 (ets domain transcrip     | 3.9692445 | 0.994432   | -0.99443245 |
| 212365_at   | 4430 MYO1B       | Hs.439620 | myosin IB                                   | 3.958283  | 0.99243736 | -0.99243736 |
| 207345_at   | 10468 FST        | Hs.9914   | follistatin                                 | 3.9470842 | 0.99039364 | -0.99039364 |
| 39248_at    | 360 AQP3         | Hs.234642 | aquaporin 3 (Gill blood group)              | 3.9418797 | 0.9894419  | -0.9894419  |
| 201416_at   | 6659 SOX4        | Hs.643910 | SRY (sex determining region Y)-box 4        | 3.9276521 | 0.9868336  | -0.9868336  |
| 214586_at   | 2861 GPR37       | Hs.723816 | G protein-coupled receptor 37 (endothelin   | 3.9208815 | 0.985589   | -0.985589   |
| 225613_at   | 375449 MAST4     | Hs.595458 | microtubule associated serine/threonine ki  | 3.9142778 | 0.9843731  | -0.9843731  |
| 242127_at   |                  | Hs.659830 |                                             | 3.8959165 | 0.98098135 | -0.98098135 |
| 220540_at   | 60598 KCNK15     | Hs.528664 | potassium channel, subfamily K, member      | 3.888229  | 0.97955656 | -0.97955656 |
| 238750_at   | 56477 CCL28      | Hs.656904 | chemokine (C-C motif) ligand 28             | 3.888144  | 0.9795408  | -0.9795408  |
| 206170_at   | 154 ADRB2        | Hs.2551   | adrenergic, beta-2-, receptor, surface      | 3.8876145 | 0.9794426  | -0.9794426  |
| 213802_at   | 8492 PRSS12      | Hs.654823 | protease, serine, 12 (neurotrypsin, motops  | 3.8632953 | 0.974916   | -0.974916   |
| 229530_at   | 2982 GUCY1A3     | Hs.24258  | guanylate cyclase 1, soluble, alpha 3       | 3.8538425 | 0.9731488  | -0.9731488  |
| 214549_x_at | 6698 SPRR1A      | Hs.46320  | small proline-rich protein 1A               | 3.853025  | 0.97299576 | -0.97299576 |

|              |               |                      |           |                                             |           |            |             |
|--------------|---------------|----------------------|-----------|---------------------------------------------|-----------|------------|-------------|
| 229842_at    | 1999          | ELF3                 | Hs.67928  | E74-like factor 3 (ets domain transcrip     | 3.827524  | 0.96820545 | -0.9682059  |
| 202644_s_at  | 7128          | TNFAIP3              | Hs.211600 | tumor necrosis factor, alpha-induced prote  | 3.819753  | 0.96673965 | -0.96673965 |
| 219517_at    | 619189 ///    | 80237 ELL3 /// SERIN | Hs.604985 | elongation factor RNA polymerase II-like    | 3.819022  | 0.9666014  | -0.96660185 |
| 33323_r_at   | 2810          | SFN                  | Hs.523718 | stratifin                                   | 3.817466  | 0.96630764 | -0.96630764 |
| 205251_at    | 8864          | PER2                 | Hs.58756  | period homolog 2 (Drosophila)               | 3.804326  | 0.96382046 | -0.96382046 |
| 233555_s_at  | 55959         | SULF2                | Hs.162016 | sulfatase 2                                 | 3.7991717 | 0.96284246 | -0.96284246 |
| 238498_at    |               |                      | Hs.349207 |                                             | 3.7677207 | 0.95684576 | -0.95684624 |
| 221655_x_at  | 54869         | EPS8L1               | Hs.438862 | EPS8-like 1                                 | 3.7648463 | 0.9562955  | -0.9562955  |
| 204751_x_at  | 1824          | DSC2                 | Hs.95612  | desmocollin 2                               | 3.7632017 | 0.9559803  | -0.9559803  |
| 225301_s_at  | 4645          | MYO5B                | Hs.720076 | myosin VB                                   | 3.7599294 | 0.9553528  | -0.9553528  |
| 205977_s_at  | 2041          | EPHA1                | Hs.89839  | EPH receptor A1                             | 3.7594435 | 0.9552598  | -0.9552593  |
| 219209_at    | 64135         | IFIH1                | Hs.163173 | interferon induced with helicase C domain   | 3.7459733 | 0.9526701  | -0.9526706  |
| 239835_at    | 84541         | KBTBD8               | Hs.116665 | kelch repeat and BTB (POZ) domain cont      | 3.7456763 | 0.95261335 | -0.9526129  |
| 219932_at    | 28965         | SLC27A6              | Hs.49765  | solute carrier family 27 (fatty acid transp | 3.7451787 | 0.95251703 | -0.9525175  |
| 1564786_at   | 338667        | LOC338667            |           | hypothetical protein LOC338667              | 3.7428684 | 0.95207214 | -0.95207214 |
| 39402_at     | 3553          | IL1B                 | Hs.126256 | interleukin 1, beta                         | 3.7208822 | 0.9478226  | -0.9478221  |
| 202207_at    | 10123         | ARL4C                | Hs.723194 | ADP-ribosylation factor-like 4C             | 3.7012484 | 0.94400597 | -0.94400597 |
| 237690_at    | 221393        | GPR115               | Hs.150131 | G protein-coupled receptor 115              | 3.7010844 | 0.943974   | -0.943974   |
| 233045_at    | 286126        | LOC286126            | Hs.214040 | hypothetical protein LOC286126              | 3.680611  | 0.93997264 | -0.93997264 |
| 206032_at    | 1825          | DSC3                 | Hs.41690  | desmocollin 3                               | 3.6770375 | 0.9392719  | -0.9392719  |
| 201976_s_at  | 4651          | MYO10                | Hs.481720 | myosin X                                    | 3.6747532 | 0.9388237  | -0.9388237  |
| 242509_at    |               |                      |           |                                             | 3.6641376 | 0.9367366  | -0.93673706 |
| 1569607_s_at | 100132733 /// | 28 ANKRD20A1 ///     | Hs.632663 | ankyrin repeat domain 20 family, member     | 3.656725  | 0.93527603 | -0.93527603 |
| 223278_at    | 2706          | GJB2                 | Hs.524894 | gap junction protein, beta 2, 26kDa         | 3.6442237 | 0.932806   | -0.93280554 |
| 229228_at    | 9586          | CREB5                | Hs.437075 | cAMP responsive element binding protei      | 3.6391072 | 0.93179226 | -0.93179226 |
| 235638_at    | 166824        | RASSF6               | Hs.590920 | Ras association (RalGDS/AF-6) domain f      | 3.6359608 | 0.93116856 | -0.9311681  |
| 1553132_a_at | 123036        | TC2N                 | Hs.510262 | tandem C2 domains, nuclear                  | 3.6343389 | 0.9308462  | -0.9308467  |
| 231460_at    | 100507511     | LOC100507511         |           | hypothetical LOC100507511                   | 3.6306636 | 0.93011665 | -0.93011665 |
| 1555310_a_at | 56924         | PAK6                 |           | p21 protein (Cdc42/Rac)-activated kinase    | 3.6281686 | 0.92962074 | -0.92962074 |
| 224435_at    | 84293         | C10orf58             | Hs.500333 | chromosome 10 open reading frame 58         | 3.6088607 | 0.9257717  | -0.9257717  |
| 231785_at    | 4909          | NTF4                 | Hs.266902 | neurotrophin 4                              | 3.6074605 | 0.9254918  | -0.9254918  |
| 238622_at    | 5912          | RAP2B                | Hs.98643  | RAP2B, member of RAS oncogene famil         | 3.606433  | 0.9252863  | -0.9252863  |
| 244780_at    | 130367        | SGPP2                | Hs.591604 | sphingosine-1-phosphate phosphatase 2       | 3.6050708 | 0.925014   | -0.92501354 |
| 236489_at    | 266977        | GPR110               | Hs.256897 | G protein-coupled receptor 110              | 3.5929344 | 0.9225812  | -0.92258143 |
| 217523_at    | 960           | CD44                 | Hs.502328 | CD44 molecule (Indian blood group)          | 3.5876012 | 0.92150974 | -0.92150974 |
| 217497_at    | 1890          | TYMP                 | Hs.592212 | thymidine phosphorylase                     | 3.5872536 | 0.9214401  | -0.92143965 |
| 210335_at    | 9182          | RASSF9               | Hs.527881 | Ras association (RalGDS/AF-6) domain f      | 3.5856428 | 0.9211159  | -0.9211159  |
| 239278_at    |               |                      | Hs.444721 |                                             | 3.583368  | 0.9206581  | -0.9206581  |
| 224013_s_at  | 83595         | SOX7                 | Hs.709543 | SRY (sex determining region Y)-box 7        | 3.5757287 | 0.9191189  | -0.9191184  |
| 208228_s_at  | 2263          | FGFR2                | Hs.533683 | fibroblast growth factor receptor 2         | 3.573745  | 0.91871834 | -0.91871834 |
| 242426_at    | 145957        | NRG4                 | Hs.696574 | neuregulin 4                                | 3.5610762 | 0.91615677 | -0.91615653 |
| 209324_s_at  | 6004          | RGS16                | Hs.413297 | regulator of G-protein signaling 16         | 3.5459528 | 0.9130864  | -0.9130869  |
| 211924_s_at  | 5329          | PLAUR                | Hs.466871 | plasminogen activator, urokinase receptor   | 3.5419574 | 0.9122734  | -0.9122734  |

|              |                                  |           |                                            |           |            |             |
|--------------|----------------------------------|-----------|--------------------------------------------|-----------|------------|-------------|
| 226403_at    | 147798 TMC4                      | Hs.355126 | transmembrane channel-like 4               | 3.541016  | 0.9120817  | -0.9120817  |
| 232678_at    |                                  | Hs.677363 |                                            | 3.5392985 | 0.9117317  | -0.9117317  |
| 222572_at    | 54704 PDP1                       | Hs.22265  | pyruvate dehydrogenase phosphatase cataly  | 3.5383067 | 0.91152954 | -0.91152954 |
| 214370_at    | 6279 S100A8                      | Hs.416073 | S100 calcium binding protein A8            | 3.5264785 | 0.90911436 | -0.9091139  |
| 212364_at    | 4430 MYO1B                       | Hs.439620 | myosin IB                                  | 3.522256  | 0.90824986 | -0.90824986 |
| 231776_at    | 8320 EOMES                       | Hs.591663 | eomesodermin                               | 3.5148258 | 0.90672636 | -0.90672684 |
| 236718_at    | 4651 MYO10                       | Hs.481720 | myosin X                                   | 3.5115607 | 0.9060559  | -0.9060564  |
| 244536_at    |                                  | Hs.624309 |                                            | 3.5097864 | 0.9056916  | -0.9056916  |
| 201743_at    | 929 CD14                         | Hs.163867 | CD14 molecule                              | 3.5067692 | 0.90507126 | -0.90507126 |
| 234608_at    | 3909 LAMA3                       | Hs.436367 | laminin, alpha 3                           | 3.503917  | 0.9044843  | -0.9044843  |
| 219518_s_at  | 619189 /// 80237 ELL3 /// SERINC | Hs.604985 | elongation factor RNA polymerase II-like   | 3.4994345 | 0.90356064 | -0.9035611  |
| 224027_at    | 56477 CCL28                      | Hs.656904 | chemokine (C-C motif) ligand 28            | 3.4930592 | 0.9022455  | -0.9022455  |
| 1554079_at   | 374378 GALNTL4                   | Hs.655152 | UDP-N-acetyl-alpha-D-galactosamine:po      | 3.4918633 | 0.9019985  | -0.9019985  |
| 218717_s_at  | 55214 LEPREL1                    | Hs.374191 | leprecan-like 1                            | 3.4735699 | 0.8982096  | -0.8982096  |
| 218032_at    | 8303 SNN                         | Hs.618526 | stannin                                    | 3.473463  | 0.89818764 | -0.89818716 |
| 240284_x_at  | 100507644 LOC100507644           |           | hypothetical LOC100507644                  | 3.464734  | 0.8963723  | -0.8963723  |
| 229552_at    | 283454 LOC283454                 | Hs.26605  | hypothetical protein LOC283454             | 3.4541907 | 0.8941736  | -0.8941741  |
| 202889_x_at  | 9053 MAP7                        | Hs.486548 | microtubule-associated protein 7           | 3.4538927 | 0.89411163 | -0.89411163 |
| 202897_at    | 140885 SIRPA                     | Hs.724417 | signal-regulatory protein alpha            | 3.4501116 | 0.8933215  | -0.8933215  |
| 228698_at    | 83595 SOX7                       | Hs.709543 | SRY (sex determining region Y)-box 7       | 3.4268117 | 0.88843346 | -0.88843346 |
| 224325_at    | 8325 FZD8                        | Hs.302634 | frizzled homolog 8 (Drosophila)            | 3.4212234 | 0.88725615 | -0.88725615 |
| 225792_at    | 51361 HOOK1                      | Hs.378836 | hook homolog 1 (Drosophila)                | 3.4192903 | 0.88684845 | -0.88684845 |
| 205531_s_at  | 27165 GLS2                       | Hs.212606 | glutaminase 2 (liver, mitochondrial)       | 3.4192598 | 0.8868418  | -0.88684225 |
| 33322_i_at   | 2810 SFN                         | Hs.523718 | stratifin                                  | 3.415723  | 0.886096   | -0.88609505 |
| 227266_s_at  | 2533 FYB                         | Hs.370503 | FYN binding protein                        | 3.4047549 | 0.88377523 | -0.8837757  |
| 205931_s_at  | 9586 CREB5                       | Hs.437075 | cAMP responsive element binding proteir    | 3.4007387 | 0.8829241  | -0.8829241  |
| 47560_at     | 22859 LPHN1                      | Hs.94229  | latrophilin 1                              | 3.3874128 | 0.88009167 | -0.88009214 |
| 240180_at    |                                  | Hs.547712 |                                            | 3.3650823 | 0.8753209  | -0.8753209  |
| 206033_s_at  | 1825 DSC3                        | Hs.41690  | desmocollin 3                              | 3.3573568 | 0.87366295 | -0.87366295 |
| 201565_s_at  | 3398 ID2                         | Hs.180919 | inhibitor of DNA binding 2, dominant neg   | 3.3559468 | 0.8733597  | -0.87336016 |
| 206277_at    | 5029 P2RY2                       | Hs.339    | purinergic receptor P2Y, G-protein coupl   | 3.3555996 | 0.8732853  | -0.8732853  |
| 206517_at    | 1014 CDH16                       | Hs.513660 | cadherin 16, KSP-cadherin                  | 3.354616  | 0.8730736  | -0.87307405 |
| 218779_x_at  | 54869 EPS8L1                     | Hs.438862 | EPS8-like 1                                | 3.3510077 | 0.87229776 | -0.8722973  |
| 208539_x_at  | 6701 SPRR2B                      | Hs.568239 | small proline-rich protein 2B              | 3.3391325 | 0.8697367  | -0.8697367  |
| 227410_at    | 131583 FAM43A                    | Hs.435080 | family with sequence similarity 43, memb   | 3.3290296 | 0.86755085 | -0.86755085 |
| 219461_at    | 56924 PAK6                       |           | p21 protein (Cdc42/Rac)-activated kinase   | 3.3224585 | 0.8661256  | -0.8661256  |
| 206122_at    | 6665 SOX15                       | Hs.95582  | SRY (sex determining region Y)-box 15      | 3.318207  | 0.86520195 | -0.86520195 |
| 233488_at    | 84659 RNASE7                     | Hs.525206 | ribonuclease, RNase A family, 7            | 3.3161755 | 0.8647604  | -0.8647599  |
| 202643_s_at  | 7128 TNFAIP3                     | Hs.211600 | tumor necrosis factor, alpha-induced prote | 3.3054218 | 0.8624172  | -0.8624172  |
| 219976_at    | 51361 HOOK1                      | Hs.378836 | hook homolog 1 (Drosophila)                | 3.2977614 | 0.8607435  | -0.8607435  |
| 1552928_s_at | 257397 TAB3                      | Hs.188256 | TGF-beta activated kinase 1/MAP3K7 bi      | 3.2875707 | 0.858511   | -0.858511   |
| 203397_s_at  | 2591 GALNT3                      | Hs.170986 | UDP-N-acetyl-alpha-D-galactosamine:po      | 3.2863019 | 0.8582325  | -0.8582325  |
| 218273_s_at  | 54704 PDP1                       | Hs.22265  | pyruvate dehydrogenase phosphatase cataly  | 3.283657  | 0.8576517  | -0.8576517  |

|              |                                  |           |                                               |           |            |             |
|--------------|----------------------------------|-----------|-----------------------------------------------|-----------|------------|-------------|
| 206156_at    | 2709 GJB5                        | Hs.198249 | gap junction protein, beta 5, 31.1kDa         | 3.2805057 | 0.85695934 | -0.85695887 |
| 244350_at    | 4651 MYO10                       | Hs.481720 | myosin X                                      | 3.2787766 | 0.8565788  | -0.8565788  |
| 202800_at    | 6507 SLC1A3                      | Hs.481918 | solute carrier family 1 (glial high affinity) | 3.2720127 | 0.8550892  | -0.8550892  |
| 201015_s_at  | 3728 JUP                         | Hs.514174 | junction plakoglobin                          | 3.2602632 | 0.85249424 | -0.85249424 |
| 201417_at    | 6659 SOX4                        | Hs.643910 | SRY (sex determining region Y)-box 4          | 3.259522  | 0.8523302  | -0.8523302  |
| 227897_at    |                                  | Hs.700713 |                                               | 3.2554264 | 0.85142326 | -0.85142326 |
| 1554246_at   | 149466 C1orf210                  | Hs.158963 | chromosome 1 open reading frame 210           | 3.2471051 | 0.84957695 | -0.8495772  |
| 219528_s_at  | 64919 BCL11B                     | Hs.709690 | B-cell CLL/lymphoma 11B (zinc finger p        | 3.2469373 | 0.84953976 | -0.84953976 |
| 204794_at    | 1844 DUSP2                       | Hs.1183   | dual specificity phosphatase 2                | 3.2456348 | 0.8492508  | -0.84924984 |
| 219991_at    | 56606 SLC2A9                     | Hs.656895 | solute carrier family 2 (facilitated glucose  | 3.2443895 | 0.8489733  | -0.84897375 |
| 227393_at    | 338440 ANO9                      | Hs.501622 | anoctamin 9                                   | 3.226708  | 0.84503174 | -0.84503126 |
| 210059_s_at  | 5603 MAPK13                      | Hs.178695 | mitogen-activated protein kinase 13           | 3.221811  | 0.84393597 | -0.84393597 |
| 226817_at    | 1824 DSC2                        | Hs.95612  | desmocollin 2                                 | 3.2165124 | 0.84274864 | -0.84274864 |
| 213923_at    | 5912 RAP2B                       | Hs.98643  | RAP2B, member of RAS oncogene famil           | 3.2163508 | 0.8427124  | -0.8427124  |
| 203713_s_at  | 3993 LLGL2                       | Hs.514477 | lethal giant larvae homolog 2 (Drosophila     | 3.2134871 | 0.8420701  | -0.8420696  |
| 225611_at    | 375449 MAST4                     | Hs.595458 | microtubule associated serine/threonine ki    | 3.2107842 | 0.8414631  | -0.8414626  |
| 213492_at    | 1280 COL2A1                      | Hs.408182 | collagen, type II, alpha 1                    | 3.2069893 | 0.84061    | -0.84060955 |
| 241455_at    | 647024 C6orf132                  | Hs.575337 | chromosome 6 open reading frame 132           | 3.1937366 | 0.83762264 | -0.83762264 |
| 210409_at    | 653483 C6orf124                  | Hs.520556 | chromosome 6 open reading frame 124           | 3.1853998 | 0.8357372  | -0.8357372  |
| 206385_s_at  | 288 ANK3                         | Hs.499725 | ankyrin 3, node of Ranvier (ankyrin G)        | 3.1847093 | 0.8355808  | -0.8355808  |
| 227717_at    | 389337 ARHGEF37                  | Hs.256206 | Rho guanine nucleotide exchange factor (      | 3.1845207 | 0.8355379  | -0.8355384  |
| 203074_at    | 244 /// 653145 /// ANXA8 /// ANX | Hs.723897 | annexin A8 /// annexin A8-like 1 /// annex    | 3.1693614 | 0.8320961  | -0.8320961  |
| 226302_at    | 5205 ATP8B1                      | Hs.216623 | ATPase, aminophospholipid transporter, c      | 3.168183  | 0.83182764 | -0.8318281  |
| 226870_at    | 118881 COMTD1                    | Hs.355333 | catechol-O-methyltransferase domain con       | 3.1628566 | 0.8306141  | -0.8306141  |
| 223218_s_at  | 64332 NFKBIZ                     | Hs.319171 | nuclear factor of kappa light polypeptide     | 3.1531496 | 0.8283968  | -0.8283968  |
| 220638_s_at  | 23624 CBLC                       | Hs.466907 | Cas-Br-M (murine) ecotropic retroviral tr     | 3.1468456 | 0.82695293 | -0.8269534  |
| 206864_s_at  | 8739 HRK                         | Hs.87247  | harakiri, BCL2 interacting protein (contai    | 3.1443772 | 0.8263869  | -0.8263874  |
| 218309_at    | 55450 CAMK2N1                    | Hs.197922 | calcium/calmodulin-dependent protein kir      | 3.1381946 | 0.8249674  | -0.8249674  |
| 238575_at    | 114880 OSBPL6                    | Hs.318775 | oxysterol binding protein-like 6              | 3.130069  | 0.8230972  | -0.8230972  |
| 219513_s_at  | 10045 SH2D3A                     | Hs.439645 | SH2 domain containing 3A                      | 3.1236107 | 0.8216076  | -0.8216071  |
| 1552496_a_at | 23242 COBL                       | Hs.99141  | cordons-bleu homolog (mouse)                  | 3.1206748 | 0.82092905 | -0.82092905 |
| 213764_s_at  | 8076 MFAP5                       | Hs.512842 | microfibrillar associated protein 5           | 3.117814  | 0.82026744 | -0.82026744 |
| 217014_s_at  | 563 AZGP1                        | Hs.546239 | alpha-2-glycoprotein 1, zinc-binding          | 3.1060514 | 0.81754065 | -0.8175411  |
| 229221_at    | 960 CD44                         | Hs.502328 | CD44 molecule (Indian blood group)            | 3.1037292 | 0.81700134 | -0.81700134 |
| 209955_s_at  | 2191 FAP                         | Hs.654370 | fibroblast activation protein, alpha          | 3.0960817 | 0.8152218  | -0.8152218  |
| 207540_s_at  | 6850 SYK                         | Hs.371720 | spleen tyrosine kinase                        | 3.0918522 | 0.8142357  | -0.8142357  |
| 235199_at    | 54941 RNF125                     | Hs.633703 | ring finger protein 125                       | 3.0889482 | 0.8135576  | -0.8135581  |
| 206132_at    | 4163 MCC                         | Hs.593171 | mutated in colorectal cancers                 | 3.0825882 | 0.81207085 | -0.8120713  |
| 237252_at    | 7056 THBD                        | Hs.2030   | thrombomodulin                                | 3.0800707 | 0.81148195 | -0.8114815  |
| 201130_s_at  | 999 CDH1                         | Hs.461086 | cadherin 1, type 1, E-cadherin (epithelial)   | 3.0746758 | 0.8102174  | -0.8102169  |
| 209774_x_at  | 2920 CXCL2                       | Hs.75765  | chemokine (C-X-C motif) ligand 2              | 3.0691595 | 0.8089218  | -0.8089218  |
| 1559034_at   | 284759 SIRPB2                    | Hs.721685 | signal-regulatory protein beta 2              | 3.0611582 | 0.8070388  | -0.8070388  |
| 209683_at    | 81553 FAM49A                     | Hs.467769 | family with sequence similarity 49, memb      | 3.0568414 | 0.80602074 | -0.806021   |

|              |                 |           |                                              |           |            |             |
|--------------|-----------------|-----------|----------------------------------------------|-----------|------------|-------------|
| 204798_at    | 4602 MYB        | Hs.606320 | v-myb myeloblastosis viral oncogene hom      | 3.0532663 | 0.80517673 | -0.80517673 |
| 232291_at    | 407975 MIR17HG  | Hs.24115  | MIR17 host gene (non-protein coding)         | 3.0400538 | 0.8020487  | -0.8020482  |
| 223423_at    | 26996 GPR160    | Hs.231320 | G protein-coupled receptor 160               | 3.033266  | 0.800436   | -0.800436   |
| 204675_at    | 6715 SRD5A1     | Hs.552    | steroid-5-alpha-reductase, alpha polypepti   | 3.0244083 | 0.7983265  | -0.7983265  |
| 205515_at    | 8492 PRSS12     | Hs.654823 | protease, serine, 12 (neurotrypsin, motops   | 3.0237846 | 0.7981777  | -0.7981777  |
| 1569203_at   | 2920 CXCL2      | Hs.75765  | chemokine (C-X-C motif) ligand 2             | 3.0209577 | 0.797503   | -0.797503   |
| 238567_at    | 130367 SGPP2    | Hs.591604 | sphingosine-1-phosphate phosphatase 2        | 3.0197167 | 0.7972069  | -0.7972064  |
| 232802_at    | 90019 SYT8      | Hs.161031 | synaptotagmin VIII                           | 3.0157201 | 0.7962513  | -0.7962513  |
| 225344_at    | 135112 NCOA7    | Hs.171426 | nuclear receptor coactivator 7               | 3.0144627 | 0.79594994 | -0.7959509  |
| 242354_at    |                 | Hs.569458 |                                              | 3.0116403 | 0.79527473 | -0.79527473 |
| 212338_at    | 4642 MYO1D      | Hs.602063 | myosin ID                                    | 3.0036578 | 0.79336023 | -0.79336023 |
| 205676_at    | 1594 CYP27B1    | Hs.524528 | cytochrome P450, family 27, subfamily B      | 2.999744  | 0.79241943 | -0.7924199  |
| 219412_at    | 23682 RAB38     | Hs.591975 | RAB38, member RAS oncogene family            | 2.9937682 | 0.7909813  | -0.7909813  |
| 225987_at    | 79689 STEAP4    | Hs.521008 | STEAP family member 4                        | 2.9892654 | 0.78989553 | -0.78989553 |
| 225822_at    | 128218 TMEM125  | Hs.104476 | transmembrane protein 125                    | 2.9870286 | 0.7893553  | -0.78935575 |
| 221942_s_at  | 2982 GUCY1A3    | Hs.24258  | guanylate cyclase 1, soluble, alpha 3        | 2.9866703 | 0.789269   | -0.789269   |
| 218559_s_at  | 9935 MAFB       | Hs.169487 | v-maf musculoaponeurotic fibrosarcoma c      | 2.9786732 | 0.7873354  | -0.78733444 |
| 221646_s_at  | 79844 ZDHHC11   | Hs.723221 | zinc finger, DHHC-type containing 11         | 2.9702713 | 0.7852974  | -0.7852974  |
| 204430_s_at  | 6518 SLC2A5     | Hs.530003 | solute carrier family 2 (facilitated glucose | 2.9651022 | 0.7840409  | -0.7840409  |
| 229598_at    | 22837 COBL1     | Hs.470457 | COBL-like 1                                  | 2.9648225 | 0.78397274 | -0.783973   |
| 211795_s_at  | 2533 FYB        | Hs.370503 | FYN binding protein                          | 2.9642057 | 0.78382254 | -0.783823   |
| 201287_s_at  | 6382 SDC1       | Hs.224607 | syndecan 1                                   | 2.9628196 | 0.7834854  | -0.7834854  |
| 225299_at    | 4645 MYO5B      | Hs.720076 | myosin VB                                    | 2.9587085 | 0.7824836  | -0.78248405 |
| 204130_at    | 3291 HSD11B2    | Hs.1376   | hydroxysteroid (11-beta) dehydrogenase 2     | 2.9572158 | 0.78211975 | -0.78211975 |
| 202357_s_at  | 629 CFB         | Hs.69771  | complement factor B                          | 2.9564495 | 0.78193283 | -0.78193283 |
| 223075_s_at  | 83543 AIF1L     | Hs.4944   | allograft inflammatory factor 1-like         | 2.9563909 | 0.7819185  | -0.7819185  |
| 213279_at    | 115817 DHRS1    | Hs.723166 | dehydrogenase/reductase (SDR family) m       | 2.9551053 | 0.78160477 | -0.78160477 |
| 219630_at    | 10158 PDZK1IP1  | Hs.431099 | PDZK1 interacting protein 1                  | 2.9541366 | 0.78136826 | -0.78136826 |
| 214071_at    | 2774 GNAL       | Hs.136295 | guanine nucleotide binding protein (G prc    | 2.9508216 | 0.7805581  | -0.7805586  |
| 235549_at    | 255488 RNF144B  | Hs.148741 | ring finger protein 144B                     | 2.9481494 | 0.77990484 | -0.77990484 |
| 210959_s_at  | 6715 SRD5A1     | Hs.552    | steroid-5-alpha-reductase, alpha polypepti   | 2.9449697 | 0.77912617 | -0.77912664 |
| 205490_x_at  | 2707 GJB3       | Hs.620718 | gap junction protein, beta 3, 31kDa          | 2.941739  | 0.7783346  | -0.7783346  |
| 210749_x_at  | 780 DDR1        | Hs.631988 | discoidin domain receptor tyrosine kinase    | 2.9407706 | 0.77809715 | -0.77809715 |
| 238028_at    | 647024 C6orf132 | Hs.575337 | chromosome 6 open reading frame 132          | 2.9374883 | 0.7772918  | -0.7772913  |
| 235046_at    | 8821 INPP4B     | Hs.658245 | inositol polyphosphate-4-phosphatase, typ    | 2.9365048 | 0.77705    | -0.77705    |
| 207178_s_at  | 2444 FRK        | Hs.89426  | fyn-related kinase                           | 2.9352784 | 0.77674866 | -0.77674866 |
| 229720_at    | 573 BAG1        | Hs.377484 | BCL2-associated athanogene                   | 2.9337537 | 0.77637386 | -0.77637386 |
| 244623_at    | 56479 KCNQ5     | Hs.445324 | potassium voltage-gated channel, KQT-lil     | 2.9333494 | 0.7762747  | -0.7762742  |
| 228155_at    | 84293 C10orf58  | Hs.500333 | chromosome 10 open reading frame 58          | 2.9329684 | 0.77618027 | -0.7761812  |
| 236172_at    | 1241 LTB4R      | Hs.567248 | leukotriene B4 receptor                      | 2.9318383 | 0.77590275 | -0.77590275 |
| 220262_s_at  | 65989 DLK2      | Hs.337251 | delta-like 2 homolog (Drosophila)            | 2.9283712 | 0.7750492  | -0.7750492  |
| 205376_at    | 8821 INPP4B     | Hs.658245 | inositol polyphosphate-4-phosphatase, typ    | 2.9279075 | 0.77493477 | -0.77493525 |
| 1559190_s_at | 112724 RDH13    | Hs.327631 | retinol dehydrogenase 13 (all-trans/9-cis)   | 2.9243746 | 0.77406406 | -0.77406406 |

|              |                  |           |                                               |           |            |             |
|--------------|------------------|-----------|-----------------------------------------------|-----------|------------|-------------|
| 228256_s_at  | 64097 EPB41L4A   | Hs.584954 | erythrocyte membrane protein band 4.1 lil     | 2.922987  | 0.7737217  | -0.7737217  |
| 237063_at    |                  | Hs.180902 |                                               | 2.9158716 | 0.7719636  | -0.7719636  |
| 201465_s_at  | 3725 JUN         | Hs.723911 | jun proto-oncogene                            | 2.9124715 | 0.7711122  | -0.7711122  |
| 202688_at    | 8743 TNFSF10     | Hs.478275 | tumor necrosis factor (ligand) superfamily    | 2.9101803 | 0.77055454 | -0.77055407 |
| 229276_at    | 57549 IGSF9      | Hs.591472 | immunoglobulin superfamily, member 9          | 2.9036443 | 0.76893234 | -0.76893234 |
| 214329_x_at  | 8743 TNFSF10     | Hs.478275 | tumor necrosis factor (ligand) superfamily    | 2.9026866 | 0.7686944  | -0.7686944  |
| 1554887_at   |                  |           |                                               | 2.9007483 | 0.7682123  | -0.7682128  |
| 209442_x_at  | 288 ANK3         | Hs.499725 | ankyrin 3, node of Ranvier (ankyrin G)        | 2.896623  | 0.76718616 | -0.7671857  |
| 224215_s_at  | 28514 DLL1       | Hs.379912 | delta-like 1 (Drosophila)                     | 2.8957882 | 0.766978   | -0.766978   |
| 218704_at    | 54894 RNF43      | Hs.584916 | ring finger protein 43                        | 2.8915493 | 0.7659216  | -0.7659211  |
| 238742_x_at  |                  | Hs.569458 |                                               | 2.8908346 | 0.76574326 | -0.7657428  |
| 205185_at    | 11005 SPINK5     | Hs.331555 | serine peptidase inhibitor, Kazal type 5      | 2.8889558 | 0.76527405 | -0.76527405 |
| 215471_s_at  | 9053 MAP7        | Hs.486548 | microtubule-associated protein 7              | 2.8885977 | 0.7651844  | -0.7651849  |
| 200606_at    | 1832 DSP         | Hs.519873 | desmoplakin                                   | 2.8844123 | 0.7641382  | -0.7641392  |
| 232701_at    |                  | Hs.663547 |                                               | 2.8781707 | 0.7625761  | -0.7625761  |
| 228302_x_at  | 55450 CAMK2N1    | Hs.197922 | calcium/calmodulin-dependent protein kir      | 2.8772728 | 0.76235104 | -0.76235104 |
| 205805_s_at  | 4919 ROR1        | Hs.654491 | receptor tyrosine kinase-like orphan recep    | 2.8757803 | 0.7619767  | -0.7619767  |
| 213107_at    | 23043 TNIK       | Hs.34024  | TRAF2 and NCK interacting kinase              | 2.8679483 | 0.7600093  | -0.76000977 |
| 200952_s_at  | 894 CCND2        | Hs.376071 | cyclin D2                                     | 2.8674157 | 0.7598758  | -0.7598753  |
| 215243_s_at  | 2707 GJB3        | Hs.620718 | gap junction protein, beta 3, 31kDa           | 2.8672972 | 0.75984573 | -0.75984573 |
| 207169_x_at  | 780 DDR1         | Hs.631988 | discoidin domain receptor tyrosine kinase     | 2.8592494 | 0.7578182  | -0.7578182  |
| 1557389_at   |                  | Hs.655149 |                                               | 2.856698  | 0.757174   | -0.7571745  |
| 203887_s_at  | 7056 THBD        | Hs.2030   | thrombomodulin                                | 2.85403   | 0.75650024 | -0.75650024 |
| 225955_at    | 284207 METRNL    | Hs.378821 | meteorin, glial cell differentiation regulato | 2.8507266 | 0.7556648  | -0.7556648  |
| 221211_s_at  | 56911 C21orf7    | Hs.222802 | chromosome 21 open reading frame 7            | 2.8490489 | 0.75524044 | -0.75523996 |
| 240304_s_at  | 79838 TMC5       | Hs.115838 | transmembrane channel-like 5                  | 2.8455076 | 0.75434303 | -0.75434303 |
| 226187_at    | 1040 CDS1        | Hs.654899 | CDP-diacylglycerol synthase (phosphatid:      | 2.8400543 | 0.75295925 | -0.75295925 |
| 90265_at     | 11033 ADAP1      | Hs.644629 | ArfGAP with dual PH domains 1                 | 2.8189087 | 0.74756813 | -0.7475686  |
| 201466_s_at  | 3725 JUN         | Hs.723911 | jun proto-oncogene                            | 2.8148038 | 0.7465172  | -0.7465172  |
| 213668_s_at  | 6659 SOX4        | Hs.643910 | SRY (sex determining region Y)-box 4          | 2.8106055 | 0.7454405  | -0.7454405  |
| 208083_s_at  | 3694 ITGB6       | Hs.470399 | integrin, beta 6                              | 2.8095114 | 0.7451596  | -0.7451596  |
| 222217_s_at  | 11000 SLC27A3    | Hs.438723 | solute carrier family 27 (fatty acid transp   | 2.809206  | 0.74508095 | -0.7450814  |
| 230482_at    | 81849 ST6GALNAC5 | Hs.303609 | ST6 (alpha-N-acetyl-neuraminy-2,3-beta-       | 2.8089988 | 0.745028   | -0.745028   |
| 201464_x_at  | 3725 JUN         | Hs.723911 | jun proto-oncogene                            | 2.8084993 | 0.74489975 | -0.74489975 |
| 222670_s_at  | 9935 MAFB        | Hs.169487 | v-maf musculoaponeurotic fibrosarcoma c       | 2.8083434 | 0.7448597  | -0.7448597  |
| 205249_at    | 1959 EGR2        | Hs.1395   | early growth response 2                       | 2.8080947 | 0.7447958  | -0.7447958  |
| 218902_at    | 4851 NOTCH1      | Hs.495473 | notch 1                                       | 2.7995727 | 0.7426033  | -0.7426033  |
| 232609_at    | 92359 CRB3       | Hs.150319 | crumbs homolog 3 (Drosophila)                 | 2.7960966 | 0.74170685 | -0.7417073  |
| 205774_at    | 2161 F12         | Hs.1321   | coagulation factor XII (Hageman factor)       | 2.7947466 | 0.74135876 | -0.74135876 |
| 228260_at    | 1993 ELAVL2      | Hs.166109 | ELAV (embryonic lethal, abnormal visior       | 2.7926848 | 0.7408266  | -0.74082613 |
| 235144_at    | 158158 RASEF     | Hs.657750 | RAS and EF-hand domain containing             | 2.7919943 | 0.74064827 | -0.7406478  |
| 223454_at    | 58191 CXCL16     | Hs.724659 | chemokine (C-X-C motif) ligand 16             | 2.7874072 | 0.7394619  | -0.7394619  |
| 1553639_a_at | 133522 PPARGC1B  | Hs.483816 | peroxisome proliferator-activated receptor    | 2.7872396 | 0.7394185  | -0.7394185  |



|              |                                                    |           |                                                   |           |            |             |
|--------------|----------------------------------------------------|-----------|---------------------------------------------------|-----------|------------|-------------|
| 204519_s_at  | 51090 PLLP                                         | Hs.632215 | plasmolipin                                       | 2.7869983 | 0.73935604 | -0.73935604 |
| 208779_x_at  | 780 DDR1                                           | Hs.631988 | discoidin domain receptor tyrosine kinase         | 2.7857568 | 0.73903465 | -0.73903465 |
| 201329_s_at  | 2114 ETS2                                          | Hs.644231 | v-ets erythroblastosis virus E26 oncogene         | 2.779804  | 0.7374916  | -0.7374916  |
| 239350_at    | 91862 MARVELD3                                     | Hs.513706 | MARVEL domain containing 3                        | 2.7755222 | 0.7363796  | -0.7363796  |
| 223895_s_at  | 55040 EPN3                                         | Hs.670090 | epsin 3                                           | 2.770855  | 0.7351656  | -0.7351656  |
| 222892_s_at  | 55287 TMEM40                                       | Hs.475502 | transmembrane protein 40                          | 2.7683825 | 0.73452187 | -0.7345214  |
| 204224_s_at  | 2643 GCH1                                          | Hs.86724  | GTP cyclohydrolase I                              | 2.7669892 | 0.7341585  | -0.7341585  |
| 226489_at    | 57458 TMCC3                                        | Hs.370410 | transmembrane and coiled-coil domain fa           | 2.7633188 | 0.733201   | -0.733201   |
| 233317_at    | 928 CD9                                            | Hs.114286 | CD9 molecule                                      | 2.7628512 | 0.73307896 | -0.73307896 |
| 201939_at    | 10769 PLK2                                         | Hs.398157 | polo-like kinase 2                                | 2.7613487 | 0.732687   | -0.73268604 |
| 203854_at    | 3426 CFI                                           | Hs.312485 | complement factor I                               | 2.758108  | 0.7318392  | -0.73183966 |
| 220588_at    | 55653 BCAS4                                        | Hs.381178 | breast carcinoma amplified sequence 4             | 2.7555192 | 0.7311621  | -0.7311621  |
| 1563900_at   | 222584 FAM83B                                      | Hs.657974 | family with sequence similarity 83, memb          | 2.7515476 | 0.7301216  | -0.7301216  |
| 206698_at    | 7504 XK                                            | Hs.78919  | X-linked Kx blood group (McLeod syndr             | 2.7390857 | 0.7268472  | -0.7268472  |
| 226666_at    | 23002 DAAM1                                        | Hs.654934 | dishevelled associated activator of morph         | 2.7367744 | 0.72623825 | -0.72623825 |
| 219352_at    | 55008 HERC6                                        | Hs.529317 | hect domain and RLD 6                             | 2.7267847 | 0.7236004  | -0.7236004  |
| 206400_at    | 3963 /// 653499 LGALS7 /// LG                      | Hs.707031 | lectin, galactoside-binding, soluble, 7 /// l     | 2.714994  | 0.7204747  | -0.72047424 |
| 227405_s_at  | 8325 FZD8                                          | Hs.302634 | frizzled homolog 8 (Drosophila)                   | 2.7140932 | 0.7202349  | -0.72023535 |
| 1560531_at   | 353132 LCE1B                                       | Hs.375103 | late cornified envelope 1B                        | 2.7138464 | 0.72016954 | -0.72016954 |
| 222354_at    | 50848 F11R                                         | Hs.517293 | F11 receptor                                      | 2.7128375 | 0.7199011  | -0.71990156 |
| 203828_s_at  | 9235 IL32                                          | Hs.943    | interleukin 32                                    | 2.7115395 | 0.71955633 | -0.71955585 |
| 242874_at    |                                                    | Hs.606505 |                                                   | 2.7107177 | 0.71933746 | -0.71933746 |
| 232290_at    |                                                    | Hs.655775 |                                                   | 2.7063777 | 0.7181816  | -0.7181816  |
| 208165_s_at  | 10279 PRSS16                                       | Hs.274407 | protease, serine, 16 (thymus)                     | 2.7010205 | 0.71675205 | -0.7167525  |
| 215074_at    | 4430 MYO1B                                         | Hs.439620 | myosin IB                                         | 2.700941  | 0.7167311  | -0.7167311  |
| 219454_at    | 25975 EGFL6                                        | Hs.12844  | EGF-like-domain, multiple 6                       | 2.699877  | 0.7164469  | -0.7164469  |
| 225283_at    | 91947 ARRDC4                                       | Hs.6093   | arrestin domain containing 4                      | 2.6949308 | 0.71512413 | -0.71512413 |
| 206865_at    | 8739 HRK                                           | Hs.87247  | harakiri, BCL2 interacting protein (contai        | 2.6936076 | 0.71476984 | -0.71476984 |
| 207126_x_at  | 54575 /// 54576 / UGT1A1 /// UGT1A10 /// UGT1A4 // |           | UDP glucuronosyltransferase 1 family, pc          | 2.6877186 | 0.71319103 | -0.71319103 |
| 232151_at    | 346389 MACC1                                       | Hs.598388 | metastasis associated in colon cancer 1           | 2.6866171 | 0.7128954  | -0.7128954  |
| 218815_s_at  | 55092 TMEM51                                       | Hs.465305 | transmembrane protein 51                          | 2.6864786 | 0.7128582  | -0.7128582  |
| 223217_s_at  | 64332 NFKBIZ                                       | Hs.319171 | nuclear factor of kappa light polypeptide $\zeta$ | 2.684604  | 0.71235466 | -0.71235466 |
| 231926_at    | 58513 EPS15L1                                      | Hs.654639 | epidermal growth factor receptor pathway          | 2.6809108 | 0.7113619  | -0.7113614  |
| 230430_at    | 954 ENTPD2                                         | Hs.123036 | ectonucleoside triphosphate diphosphohyc          | 2.680777  | 0.71132565 | -0.71132565 |
| 227021_at    | 221656 KDM1B                                       | Hs.709336 | lysine (K)-specific demethylase 1B                | 2.6786206 | 0.71074533 | -0.71074486 |
| 203888_at    | 7056 THBD                                          | Hs.2030   | thrombomodulin                                    | 2.6731927 | 0.7092819  | -0.7092819  |
| 1552797_s_at | 150696 PROM2                                       | Hs.469313 | prominin 2                                        | 2.6730902 | 0.70925426 | -0.70925426 |
| 217744_s_at  | 64065 PERP                                         | Hs.201446 | PERP, TP53 apoptosis effector                     | 2.6724718 | 0.7090874  | -0.7090874  |
| 210058_at    | 5603 MAPK13                                        | Hs.178695 | mitogen-activated protein kinase 13               | 2.672138  | 0.70899725 | -0.70899725 |
| 40016_g_at   | 375449 MAST4                                       | Hs.595458 | microtubule associated serine/threonine ki        | 2.6713626 | 0.7087879  | -0.7087879  |
| 204714_s_at  | 2153 F5                                            | Hs.30054  | coagulation factor V (proaccelerin, labile        | 2.6690838 | 0.7081723  | -0.7081723  |
| 202687_s_at  | 8743 TNFSF10                                       | Hs.478275 | tumor necrosis factor (ligand) superfamily        | 2.6609933 | 0.7059827  | -0.7059822  |
| 209126_x_at  | 3854 KRT6B                                         | Hs.708950 | keratin 6B                                        | 2.6564844 | 0.70475864 | -0.7047596  |

|              |                                 |           |                                              |           |            |             |
|--------------|---------------------------------|-----------|----------------------------------------------|-----------|------------|-------------|
| 241021_at    |                                 | Hs.667718 |                                              | 2.6529818 | 0.70380735 | -0.70380735 |
| 226068_at    | 6850 SYK                        | Hs.371720 | spleen tyrosine kinase                       | 2.652167  | 0.7035861  | -0.7035856  |
| 200924_s_at  | 6520 SLC3A2                     | Hs.502769 | solute carrier family 3 (activators of dibas | 2.6518893 | 0.7035103  | -0.7035103  |
| 218792_s_at  | 54836 BSPRY                     | Hs.614517 | B-box and SPRY domain containing             | 2.648812  | 0.70267296 | -0.7026725  |
| 218990_s_at  | 6707 SPRR3                      | Hs.139322 | small proline-rich protein 3                 | 2.6478002 | 0.70239735 | -0.70239687 |
| 213085_s_at  | 23286 WWC1                      | Hs.484047 | WW and C2 domain containing 1                | 2.6477275 | 0.7023773  | -0.7023773  |
| 223805_at    | 114880 OSBPL6                   | Hs.318775 | oxysterol binding protein-like 6             | 2.6475945 | 0.7023411  | -0.7023411  |
| 242053_at    |                                 | Hs.596071 |                                              | 2.6455922 | 0.7017951  | -0.7017956  |
| 242873_at    |                                 | Hs.638425 |                                              | 2.6441393 | 0.7013993  | -0.70139885 |
| 227461_at    | 85439 STON2                     | Hs.14248  | stonin 2                                     | 2.6430376 | 0.70109844 | -0.70109844 |
| 209569_x_at  | 27065 D4S234E                   | Hs.518595 | DNA segment on chromosome 4 (unique)         | 2.6407218 | 0.70046616 | -0.70046616 |
| 206115_at    | 1960 EGR3                       | Hs.534313 | early growth response 3                      | 2.6385336 | 0.6998682  | -0.6998682  |
| 230708_at    | 144165 PRICKLE1                 | Hs.720221 | prickle homolog 1 (Drosophila)               | 2.6382258 | 0.6997838  | -0.6997843  |
| 205109_s_at  | 50649 ARHGEF4                   | Hs.469935 | Rho guanine nucleotide exchange factor (     | 2.6378458 | 0.6996803  | -0.69967985 |
| 208123_at    | 9312 KCNB2                      | Hs.661102 | potassium voltage-gated channel, Shab-re     | 2.6376147 | 0.6996169  | -0.6996169  |
| 202575_at    | 1382 CRABP2                     | Hs.405662 | cellular retinoic acid binding protein 2     | 2.6260297 | 0.69644165 | -0.69644165 |
| 209125_at    | 3853 KRT6A                      | Hs.700779 | keratin 6A                                   | 2.6197119 | 0.69470406 | -0.69470406 |
| 231102_at    | 54677 CROT                      | Hs.125039 | carnitine O-octanoyltransferase              | 2.6186478 | 0.6944108  | -0.6944113  |
| 209720_s_at  | 6317 SERPINB3                   | Hs.227948 | serpin peptidase inhibitor, clade B (ovalbi  | 2.6176095 | 0.69412494 | -0.69412494 |
| 201328_at    | 2114 ETS2                       | Hs.644231 | v-ets erythroblastosis virus E26 oncogene    | 2.6125798 | 0.6927376  | -0.6927376  |
| 236261_at    | 114880 OSBPL6                   | Hs.318775 | oxysterol binding protein-like 6             | 2.6090531 | 0.6917629  | -0.6917634  |
| 204713_s_at  | 2153 F5                         | Hs.30054  | coagulation factor V (proaccelerin, labile   | 2.6089764 | 0.69174194 | -0.69174194 |
| 227204_at    | 84552 PARD6G                    | Hs.654920 | par-6 partitioning defective 6 homolog ga    | 2.607721  | 0.6913948  | -0.6913948  |
| 239775_at    |                                 |           |                                              | 2.6054485 | 0.69076586 | -0.69076586 |
| 1564796_at   | 2012 EMP1                       | Hs.436298 | epithelial membrane protein 1                | 2.6015692 | 0.68969107 | -0.68969107 |
| 225496_s_at  | 54843 SYTL2                     | Hs.369520 | synaptotagmin-like 2                         | 2.599216  | 0.6890383  | -0.6890383  |
| 1553589_a_at | 10158 PDZK1IP1                  | Hs.431099 | PDZK1 interacting protein 1                  | 2.59854   | 0.6888504  | -0.6888509  |
| 230179_at    | 285812 LOC285812                | Hs.593631 | hypothetical protein LOC285812               | 2.5902352 | 0.68654156 | -0.68654156 |
| 1554921_a_at | 8796 SCEL                       | Hs.534699 | sciellin                                     | 2.5859525 | 0.68534803 | -0.6853478  |
| 244665_at    |                                 | Hs.668855 |                                              | 2.5826082 | 0.6844144  | -0.6844144  |
| 226912_at    | 254887 ZDHHC23                  | Hs.21902  | zinc finger, DHHC-type containing 23         | 2.5806816 | 0.68387604 | -0.68387604 |
| 225020_at    | 153090 DAB2IP                   | Hs.522378 | DAB2 interacting protein                     | 2.578751  | 0.68333626 | -0.68333626 |
| 212558_at    | 10252 SPRY1                     | Hs.436944 | sprouty homolog 1, antagonist of FGF sig     | 2.5774848 | 0.68298197 | -0.68298197 |
| 239196_at    | 118932 ANKRD22                  | Hs.217484 | ankyrin repeat domain 22                     | 2.577311  | 0.68293333 | -0.68293333 |
| 1555421_at   | 130340 AP1S3                    | Hs.632555 | adaptor-related protein complex 1, sigma     | 2.5765429 | 0.6827183  | -0.6827183  |
| 213267_at    | 100509911 /// 23 DOPEY1 /// LOC | Hs.520246 | dopey family member 1 /// hypothetical L     | 2.576542  | 0.6827178  | -0.6827183  |
| 212560_at    | 6653 SORL1                      | Hs.368592 | sortilin-related receptor, L(DLR class) A 1  | 2.5747304 | 0.6822109  | -0.68221045 |
| 1553986_at   | 158158 RASEF                    | Hs.657750 | RAS and EF-hand domain containing            | 2.5736575 | 0.68191004 | -0.68191004 |
| 201656_at    | 3655 ITGA6                      | Hs.133397 | integrin, alpha 6                            | 2.573547  | 0.68187904 | -0.68187904 |
| 214580_x_at  | 286887 /// 3853 / KRT6A /// KRT | Hs.708950 | keratin 6A /// keratin 6B /// keratin 6C     | 2.573506  | 0.6818676  | -0.6818676  |
| 202206_at    | 10123 ARL4C                     | Hs.723194 | ADP-ribosylation factor-like 4C              | 2.5689187 | 0.6805806  | -0.6805806  |
| 223784_at    | 57393 TMEM27                    | Hs.129614 | transmembrane protein 27                     | 2.5689187 | 0.6805806  | -0.6805806  |
| 225467_s_at  | 112724 RDH13                    | Hs.327631 | retinol dehydrogenase 13 (all-trans/9-cis)   | 2.5676336 | 0.68021965 | -0.68021965 |

|              |                        |           |                                                  |           |            |             |
|--------------|------------------------|-----------|--------------------------------------------------|-----------|------------|-------------|
| 1007_s_at    | 780 DDR1               | Hs.631988 | discoidin domain receptor tyrosine kinase        | 2.5657501 | 0.67969036 | -0.67969036 |
| 204019_s_at  | 26751 SH3YL1           | Hs.515951 | SH3 domain containing, Ysc84-like 1 (S.          | 2.5581276 | 0.67754364 | -0.6775446  |
| 228975_at    | 80320 SP6              | Hs.253603 | Sp6 transcription factor                         | 2.5580795 | 0.67753077 | -0.6775303  |
| 209173_at    | 10551 AGR2             | Hs.530009 | anterior gradient homolog 2 ( <i>Xenopus lae</i> | 2.5575907 | 0.6773925  | -0.67739296 |
| 226200_at    | 57176 VARS2            | Hs.597526 | valyl-tRNA synthetase 2, mitochondrial (†        | 2.5520184 | 0.6758194  | -0.6758194  |
| 233634_at    | 91862 MARVELD3         | Hs.513706 | MARVEL domain containing 3                       | 2.5512679 | 0.6756072  | -0.6756072  |
| 235310_at    | 257144 GCET2           | Hs.49614  | germinal center expressed transcript 2           | 2.5466814 | 0.67430925 | -0.67430925 |
| 244353_s_at  | 154091 SLC2A12         | Hs.486508 | solute carrier family 2 (facilitated glucose     | 2.5442753 | 0.6736274  | -0.6736274  |
| 219648_at    | 55686 MREG             | Hs.707104 | melanoregulin                                    | 2.5431032 | 0.673295   | -0.673295   |
| 236595_at    | 100507307 LOC100507307 |           | hypothetical LOC100507307                        | 2.5381029 | 0.6718755  | -0.671875   |
| 238513_at    | 79056 PRRG4            | Hs.471695 | Proline rich Gla (G-carboxyglutamic acid,        | 2.5380952 | 0.6718731  | -0.6718731  |
| 210026_s_at  | 29775 CARD10           | Hs.57973  | caspase recruitment domain family, mem†          | 2.5325377 | 0.6702919  | -0.6702919  |
| 205309_at    | 27293 SMPDL3B          | Hs.123659 | sphingomyelin phosphodiesterase, acid-lil        | 2.5252516 | 0.66821384 | -0.66821337 |
| 231858_x_at  | 91056 DKFZp761E198     | Hs.591957 | DKFZp761E198 protein                             | 2.5241094 | 0.6678872  | -0.6678872  |
| 223322_at    | 83593 RASSF5           | Hs.497579 | Ras association (RalGDS/AF-6) domain f           | 2.522815  | 0.6675172  | -0.6675172  |
| 216641_s_at  | 3898 LAD1              | Hs.519035 | ladinin 1                                        | 2.517766  | 0.6660719  | -0.66607237 |
| 203765_at    | 25801 GCA              | Hs.377894 | grancalcin, EF-hand calcium binding prot         | 2.5166724 | 0.6657586  | -0.66575885 |
| 209631_s_at  | 2861 GPR37             | Hs.723816 | G protein-coupled receptor 37 (endothelin        | 2.513239  | 0.66477394 | -0.66477394 |
| 203586_s_at  | 379 ARL4D              | Hs.183153 | ADP-ribosylation factor-like 4D                  | 2.5118861 | 0.6643858  | -0.6643853  |
| 226065_at    | 144165 PRICKLE1        | Hs.524348 | prickle homolog 1 ( <i>Drosophila</i> )          | 2.5102396 | 0.6639123  | -0.6639128  |
| 231311_at    |                        | Hs.634674 |                                                  | 2.5094945 | 0.6636982  | -0.6636987  |
| 228221_at    | 126969 SLC44A3         | Hs.483423 | solute carrier family 44, member 3               | 2.5078065 | 0.66321325 | -0.6632128  |
| 200635_s_at  | 5792 PTPRF             | Hs.272062 | protein tyrosine phosphatase, receptor typ       | 2.503711  | 0.66203403 | -0.66203403 |
| 219395_at    | 80004 ESRP2            | Hs.592053 | epithelial splicing regulatory protein 2         | 2.503165  | 0.6618767  | -0.6618767  |
| 227806_at    | 404550 C16orf74        | Hs.461655 | chromosome 16 open reading frame 74              | 2.498593  | 0.66055775 | -0.6605582  |
| 219115_s_at  | 53832 IL20RA           | Hs.445868 | interleukin 20 receptor, alpha                   | 2.4953308 | 0.6596155  | -0.6596155  |
| 229952_at    |                        | Hs.660389 |                                                  | 2.495127  | 0.6595564  | -0.65955687 |
| 225566_at    | 8828 NRP2              | Hs.471200 | neuropilin 2                                     | 2.4936702 | 0.65913534 | -0.65913534 |
| 201566_x_at  | 3398 ID2               | Hs.180919 | inhibitor of DNA binding 2, dominant neg         | 2.4906604 | 0.65826416 | -0.65826416 |
| 224240_s_at  | 56477 CCL28            | Hs.656904 | chemokine (C-C motif) ligand 28                  | 2.4904406 | 0.65820074 | -0.65820026 |
| 203332_s_at  | 3635 INPP5D            | Hs.262886 | inositol polyphosphate-5-phosphatase, 14:        | 2.4840407 | 0.6563444  | -0.6563444  |
| 237187_at    |                        | Hs.610726 |                                                  | 2.4797177 | 0.65508795 | -0.65508795 |
| 233565_s_at  | 27111 SDCBP2           | Hs.657015 | syndecan binding protein (syntenin) 2            | 2.4759784 | 0.6539993  | -0.6539993  |
| 228787_s_at  | 55653 BCAS4            | Hs.381178 | breast carcinoma amplified sequence 4            | 2.473706  | 0.653337   | -0.653337   |
| 228885_at    | 256691 MAMDC2          | Hs.547172 | MAM domain containing 2                          | 2.4730911 | 0.6531577  | -0.6531577  |
| 202193_at    | 3985 LIMK2             | Hs.474596 | LIM domain kinase 2                              | 2.4661448 | 0.65112877 | -0.65112877 |
| 1552487_a_at | 646 BNC1               | Hs.459153 | basonuclin 1                                     | 2.463844  | 0.6504555  | -0.6504555  |
| 219684_at    | 64108 RTP4             | Hs.43388  | receptor (chemosensory) transporter prote        | 2.4602425 | 0.64940023 | -0.64940023 |
| 1555829_at   | 57488 ESYT2            | Hs.490795 | extended synaptotagmin-like protein 2            | 2.4592202 | 0.6491003  | -0.64910054 |
| 229225_at    | 8828 NRP2              | Hs.471200 | neuropilin 2                                     | 2.4585922 | 0.64891624 | -0.64891624 |
| 216268_s_at  | 182 JAG1               | Hs.724464 | jagged 1                                         | 2.4541626 | 0.64761543 | -0.64761543 |
| 222642_s_at  | 55161 TMEM33           | Hs.31082  | transmembrane protein 33                         | 2.4525132 | 0.64713    | -0.64713097 |
| 204667_at    | 3169 FOXA1             | Hs.163484 | forkhead box A1                                  | 2.4495938 | 0.6462712  | -0.6462712  |

|              |                                                    |           |                                             |           |            |             |
|--------------|----------------------------------------------------|-----------|---------------------------------------------|-----------|------------|-------------|
| 218844_at    | 80221 ACSF2                                        | Hs.288959 | acyl-CoA synthetase family member 2         | 2.4445612 | 0.6447878  | -0.6447878  |
| 236543_at    |                                                    | Hs.130203 |                                             | 2.4432478 | 0.6444001  | -0.6444001  |
| 210145_at    | 5321 PLA2G4A                                       | Hs.497200 | phospholipase A2, group IVA (cytosolic,     | 2.4413993 | 0.64385414 | -0.64385414 |
| 235605_at    | 54897 CASZ1                                        | Hs.439894 | castor zinc finger 1                        | 2.4330337 | 0.6413779  | -0.6413784  |
| 216060_s_at  | 23002 DAAM1                                        | Hs.654934 | dishevelled associated activator of morpho  | 2.4278772 | 0.63984776 | -0.63984776 |
| 1555772_a_at | 993 CDC25A                                         | Hs.437705 | cell division cycle 25 homolog A (S. poml   | 2.4229417 | 0.63838005 | -0.6383796  |
| 232001_at    | 439949 LOC439949                                   | Hs.590987 | hypothetical LOC439949                      | 2.420826  | 0.6377497  | -0.6377497  |
| 222870_s_at  | 10678 B3GNT2                                       | Hs.173203 | UDP-GlcNAc:betaGal beta-1,3-N-acetylgl      | 2.419722  | 0.63742065 | -0.63742065 |
| 203144_s_at  | 9674 KIAA0040                                      | Hs.518138 | KIAA0040                                    | 2.4189544 | 0.6371918  | -0.6371918  |
| 218780_at    | 29911 HOOK2                                        | Hs.30792  | hook homolog 2 (Drosophila)                 | 2.414574  | 0.6358843  | -0.6358843  |
| 218465_at    | 55161 TMEM33                                       | Hs.31082  | transmembrane protein 33                    | 2.4128156 | 0.6353588  | -0.6353588  |
| 1555724_s_at | 6876 TAGLN                                         | Hs.410977 | transgelin                                  | 2.411799  | 0.6350546  | -0.63505507 |
| 201005_at    | 928 CD9                                            | Hs.114286 | CD9 molecule                                | 2.407106  | 0.6336498  | -0.6336498  |
| 208596_s_at  | 54575 /// 54576 / UGT1A1 /// UGT1A10 /// UGT1A3 // |           | UDP glucuronosyltransferase 1 family, pc    | 2.40309   | 0.63244534 | -0.63244534 |
| 1564706_s_at | 27165 GLS2                                         | Hs.212606 | glutaminase 2 (liver, mitochondrial)        | 2.3993528 | 0.6313224  | -0.63132286 |
| 214734_at    | 23086 EXPH5                                        | Hs.28540  | exophilin 5                                 | 2.393587  | 0.6295872  | -0.6295872  |
| 223233_s_at  | 57530 CGN                                          | Hs.591464 | cingulin                                    | 2.3923113 | 0.62920284 | -0.62920237 |
| 200636_s_at  | 5792 PTPRF                                         | Hs.272062 | protein tyrosine phosphatase, receptor typ  | 2.3905292 | 0.628665   | -0.628665   |
| 207557_s_at  | 6262 RYR2                                          | Hs.109514 | ryanodine receptor 2 (cardiac)              | 2.389434  | 0.6283345  | -0.6283345  |
| 219142_at    | 65997 RASL11B                                      | Hs.8035   | RAS-like, family 11, member B               | 2.3894105 | 0.62832737 | -0.62832737 |
| 223748_at    | 83959 SLC4A11                                      | Hs.105607 | solute carrier family 4, sodium borate tran | 2.3879673 | 0.62789154 | -0.62789154 |
| 206581_at    | 646 BNC1                                           | Hs.459153 | basonuclin 1                                | 2.3874242 | 0.6277275  | -0.6277275  |
| 227195_at    | 84858 ZNF503                                       | Hs.195710 | zinc finger protein 503                     | 2.3869445 | 0.62758255 | -0.62758255 |
| 222891_s_at  | 53335 BCL11A                                       | Hs.370549 | B-cell CLL/lymphoma 11A (zinc finger p      | 2.384828  | 0.62694263 | -0.62694263 |
| 232662_x_at  | 84293 C10orf58                                     | Hs.718589 | chromosome 10 open reading frame 58         | 2.3842826 | 0.62677765 | -0.62677765 |
| 240861_at    |                                                    |           |                                             | 2.384007  | 0.6266942  | -0.6266942  |
| 222348_at    |                                                    |           |                                             | 2.3834412 | 0.626523   | -0.626523   |
| 231192_at    | 23566 LPAR3                                        | Hs.674915 | lysophosphatidic acid receptor 3            | 2.3831904 | 0.6264472  | -0.62644696 |
| 226560_at    |                                                    | Hs.210043 |                                             | 2.3825622 | 0.62625694 | -0.62625694 |
| 229933_at    | 148304 C1orf74                                     | Hs.497642 | chromosome 1 open reading frame 74          | 2.3822606 | 0.6261654  | -0.62616587 |
| 205266_at    | 3976 LIF                                           | Hs.2250   | leukemia inhibitory factor (cholinergic dif | 2.3810823 | 0.6258087  | -0.6258087  |
| 45633_at     | 64785 GINS3                                        | Hs.47125  | GINS complex subunit 3 (Psf3 homolog)       | 2.3800342 | 0.62549114 | -0.62549114 |
| 234970_at    | 123036 TC2N                                        | Hs.510262 | tandem C2 domains, nuclear                  | 2.379696  | 0.6253886  | -0.6253886  |
| 228918_at    | 100288617 LOC100288617                             | Hs.720040 | Hypothetical protein LOC100288617           | 2.3790975 | 0.6252074  | -0.62520695 |
| 219497_s_at  | 53335 BCL11A                                       | Hs.370549 | B-cell CLL/lymphoma 11A (zinc finger p      | 2.3787878 | 0.6251135  | -0.625113   |
| 206391_at    | 5918 RARRES1                                       | Hs.131269 | retinoic acid receptor responder (tazaroter | 2.3753238 | 0.62406206 | -0.62406206 |
| 211661_x_at  | 5724 PTAFR                                         | Hs.433540 | platelet-activating factor receptor         | 2.374662  | 0.62386084 | -0.6238613  |
| 235269_at    | 113828 FAM83F                                      | Hs.197680 | family with sequence similarity 83, memb    | 2.3742726 | 0.6237426  | -0.62374306 |
| 1555801_s_at | 151126 ZNF385B                                     | Hs.655005 | zinc finger protein 385B                    | 2.3713768 | 0.62286234 | -0.6228626  |
| 205466_s_at  | 9957 HS3ST1                                        | Hs.507348 | heparan sulfate (glucosamine) 3-O-sulfotr   | 2.3693552 | 0.6222472  | -0.6222472  |
| 213191_at    | 148022 TICAM1                                      | Hs.29344  | toll-like receptor adaptor molecule 1       | 2.3653762 | 0.6210346  | -0.6210351  |
| 220052_s_at  | 26277 TINF2                                        | Hs.496191 | TERF1 (TRF1)-interacting nuclear factor     | 2.365019  | 0.6209259  | -0.6209259  |
| 219429_at    | 79152 FA2H                                         | Hs.461329 | fatty acid 2-hydroxylase                    | 2.3644845 | 0.6207628  | -0.6207628  |

|              |           |           |           |                                            |           |            |             |
|--------------|-----------|-----------|-----------|--------------------------------------------|-----------|------------|-------------|
| 1559132_at   | 283232    | TMEM80    | Hs.448664 | transmembrane protein 80                   | 2.3595498 | 0.619256   | -0.61925554 |
| 204268_at    | 6273      | S100A2    | Hs.516484 | S100 calcium binding protein A2            | 2.3589203 | 0.6190634  | -0.6190634  |
| 230769_at    | 163259    | DENND2C   | Hs.654928 | DENN/MADD domain containing 2C             | 2.3584495 | 0.6189194  | -0.6189194  |
| 231183_s_at  | 182       | JAG1      | Hs.724464 | Jagged 1 (Alagille syndrome)               | 2.3576202 | 0.6186657  | -0.6186657  |
| 208156_x_at  | 83481     | EPPK1     | Hs.200412 | epiplakin 1                                | 2.3559813 | 0.61816406 | -0.61816406 |
| 201422_at    | 10437     | IFI30     | Hs.14623  | interferon, gamma-inducible protein 30     | 2.35271   | 0.61716175 | -0.61716175 |
| 231726_at    | 56122     | PCDHB14   | Hs.658497 | protocadherin beta 14                      | 2.3504732 | 0.6164756  | -0.6164756  |
| 202934_at    | 3099      | HK2       | Hs.406266 | hexokinase 2                               | 2.3489618 | 0.6160116  | -0.6160116  |
| 1566232_at   |           |           | Hs.652960 |                                            | 2.348236  | 0.61578846 | -0.61578894 |
| 200637_s_at  | 5792      | PTPRF     | Hs.272062 | protein tyrosine phosphatase, receptor typ | 2.3461103 | 0.61513567 | -0.6151352  |
| 240135_x_at  |           |           | Hs.716603 |                                            | 2.345753  | 0.6150255  | -0.6150255  |
| 1556499_s_at | 1277      | COL1A1    | Hs.172928 | collagen, type I, alpha 1                  | 2.3394566 | 0.6130867  | -0.6130867  |
| 204029_at    | 1952      | CELSR2    | Hs.57652  | cadherin, EGF LAG seven-pass G-type re     | 2.338936  | 0.6129265  | -0.612926   |
| 1564651_at   | 221710    | LOC221710 | Hs.656600 | hypothetical protein LOC221710             | 2.3382328 | 0.61270905 | -0.6127095  |
| 213913_s_at  | 23329     | TBC1D30   | Hs.192492 | TBC1 domain family, member 30              | 2.3361526 | 0.6120672  | -0.6120672  |
| 225645_at    | 26298     | EHF       | Hs.653859 | ets homologous factor                      | 2.3353403 | 0.6118164  | -0.6118164  |
| 36499_at     | 1952      | CELSR2    | Hs.57652  | cadherin, EGF LAG seven-pass G-type re     | 2.33426   | 0.6114826  | -0.6114826  |
| 222895_s_at  | 64919     | BCL11B    | Hs.709690 | B-cell CLL/lymphoma 11B (zinc finger p     | 2.3305438 | 0.61033344 | -0.6103332  |
| 209212_s_at  | 688       | KLF5      | Hs.508234 | Kruppel-like factor 5 (intestinal)         | 2.32502   | 0.6086216  | -0.6086216  |
| 209098_s_at  | 182       | JAG1      | Hs.724464 | jagged 1                                   | 2.3237348 | 0.6082225  | -0.60822296 |
| 209782_s_at  | 1628      | DBP       | Hs.528006 | D site of albumin promoter (albumin D-bo   | 2.3223467 | 0.6077914  | -0.6077919  |
| 221232_s_at  | 26287     | ANKRD2    | Hs.73708  | ankyrin repeat domain 2 (stretch responsi  | 2.3207207 | 0.60728645 | -0.60728645 |
| 205547_s_at  | 6876      | TAGLN     | Hs.410977 | transgelin                                 | 2.3201983 | 0.6071243  | -0.60712385 |
| 219168_s_at  | 55615     | PRR5      | Hs.102336 | proline rich 5 (renal)                     | 2.3194048 | 0.6068773  | -0.6068773  |
| 223059_s_at  | 83641     | FAM107B   | Hs.446315 | family with sequence similarity 107, mem   | 2.3193197 | 0.6068506  | -0.6068511  |
| 238673_at    |           |           | Hs.701196 |                                            | 2.3190162 | 0.6067567  | -0.6067562  |
| 227379_at    | 154141    | MBOAT1    | Hs.377830 | membrane bound O-acyltransferase doma      | 2.3163443 | 0.6059246  | -0.6059251  |
| 227347_x_at  | 57801     | HES4      | Hs.154029 | hairy and enhancer of split 4 (Drosophila) | 2.3147807 | 0.60543776 | -0.60543776 |
| 203143_s_at  | 9674      | KIAA0040  | Hs.518138 | KIAA0040                                   | 2.314122  | 0.60523224 | -0.6052327  |
| 1552580_at   | 205860    | TRIML2    | Hs.276429 | tripartite motif family-like 2             | 2.3131883 | 0.60494137 | -0.60494137 |
| 240877_x_at  |           |           | Hs.664374 |                                            | 2.3116148 | 0.6044507  | -0.6044502  |
| 1557522_x_at |           |           | Hs.595233 |                                            | 2.3114893 | 0.6044111  | -0.6044116  |
| 218501_at    | 50650     | ARHGEF3   | Hs.476402 | Rho guanine nucleotide exchange factor (   | 2.3109448 | 0.6042414  | -0.6042414  |
| 243856_at    | 347404    | LANCL3    | Hs.521932 | LanC lantibiotic synthetase component C-   | 2.3096633 | 0.6038413  | -0.6038413  |
| 227498_at    | 55553     | SOX6      | Hs.368226 | SRY (sex determining region Y)-box 6       | 2.309425  | 0.6037669  | -0.6037669  |
| 220513_at    | 100129128 | KHDC1L    | Hs.663639 | KH homology domain containing 1-like       | 2.3069108 | 0.6029811  | -0.6029811  |
| 238909_at    |           |           |           |                                            | 2.303852  | 0.6020241  | -0.6020241  |
| 218062_x_at  | 23580     | CDC42EP4  | Hs.3903   | CDC42 effector protein (Rho GTPase bin     | 2.3036726 | 0.6019678  | -0.6019678  |
| 232682_at    | 55686     | MREG      | Hs.707104 | melanoregulin                              | 2.3025086 | 0.60160303 | -0.6016035  |
| 1552304_at   | 84920     | ALG10     | Hs.102971 | asparagine-linked glycosylation 10, alpha  | 2.3022673 | 0.6015277  | -0.6015277  |
| 204201_s_at  | 5783      | PTPN13    | Hs.436142 | protein tyrosine phosphatase, non-recepto  | 2.3009696 | 0.60112095 | -0.60112095 |
| 239012_at    | 255488    | RNF144B   | Hs.148741 | Ring finger protein 144B                   | 2.3008661 | 0.6010885  | -0.6010885  |
| 227072_at    | 25914     | RTTN      | Hs.654809 | rotatin                                    | 2.3006198 | 0.6010113  | -0.6010113  |

|              |                  |           |                                                   |           |            |             |
|--------------|------------------|-----------|---------------------------------------------------|-----------|------------|-------------|
| 222937_s_at  | 79148 MMP28      | Hs.380710 | matrix metalloproteinase 28                       | 2.2997599 | 0.6007414  | -0.60074186 |
| 235667_at    | 643783 LOC643783 | Hs.631514 | hypothetical LOC643783                            | 2.2996664 | 0.6007123  | -0.6007123  |
| 204750_s_at  | 1824 DSC2        | Hs.95612  | desmocollin 2                                     | 2.298424  | 0.60032225 | -0.60032227 |
| 223000_s_at  | 50848 F11R       | Hs.517293 | F11 receptor                                      | 2.2923615 | 0.5984173  | -0.5984173  |
| 226246_at    | 284252 KC1D1     | Hs.526630 | potassium channel tetramerisation domain          | 2.2870913 | 0.59675694 | -0.59675694 |
| 207735_at    | 54941 RNF125     | Hs.633703 | ring finger protein 125                           | 2.2866302 | 0.5966115  | -0.5966115  |
| 239412_at    | 3663 IRF5        | Hs.521181 | interferon regulatory factor 5                    | 2.2864585 | 0.59655714 | -0.59655714 |
| 219411_at    | 79767 ELMO3      | Hs.377416 | engulfment and cell motility 3                    | 2.2848184 | 0.5960398  | -0.5960398  |
| 219503_s_at  | 55287 TMEM40     | Hs.475502 | transmembrane protein 40                          | 2.278746  | 0.59412    | -0.59412    |
| 219091_s_at  | 79812 MMRN2      | Hs.524479 | multimerin 2                                      | 2.2765958 | 0.5934391  | -0.5934391  |
| 242627_at    |                  | Hs.682433 |                                                   | 2.275854  | 0.593204   | -0.593204   |
| 230005_at    | 258010 SVIP      | Hs.349096 | small VCP/p97-interacting protein                 | 2.2721186 | 0.5920191  | -0.5920191  |
| 228707_at    | 137075 CLDN23    | Hs.183617 | claudin 23                                        | 2.2673826 | 0.5905142  | -0.5905137  |
| 231365_at    |                  |           |                                                   | 2.2661576 | 0.59012413 | -0.59012413 |
| 212812_at    | 256987 SERINC5   | Hs.655558 | serine incorporator 5                             | 2.2645254 | 0.5896044  | -0.5896044  |
| 214763_at    | 26027 ACOT11     | Hs.724769 | acyl-CoA thioesterase 11                          | 2.2624853 | 0.588954   | -0.58895445 |
| 221701_s_at  | 64220 STRA6      | Hs.24553  | stimulated by retinoic acid gene 6 homolog        | 2.2571821 | 0.5872617  | -0.5872612  |
| 201693_s_at  | 1958 EGR1        | Hs.326035 | early growth response 1                           | 2.256886  | 0.5871668  | -0.5871668  |
| 225459_at    | 154810 AMOTL1    | Hs.503594 | angiomin like 1                                   | 2.2553246 | 0.58666754 | -0.58666754 |
| 227599_at    | 151963 C3orf59   | Hs.151443 | chromosome 3 open reading frame 59                | 2.2550547 | 0.58658123 | -0.58658123 |
| 239660_at    | 57186 RALGAPA2   | Hs.472285 | Ral GTPase activating protein, alpha subunit      | 2.2543087 | 0.58634233 | -0.5863428  |
| 242450_at    | 285704 RGM B     | Hs.526902 | RGM domain family, member B                       | 2.2528946 | 0.5858898  | -0.58589005 |
| 1565868_at   | 960 CD44         | Hs.502328 | CD44 molecule (Indian blood group)                | 2.2526338 | 0.58580637 | -0.58580637 |
| 227802_at    | 22902 RUFY3      | Hs.724391 | RUN and FYVE domain containing 3                  | 2.2497334 | 0.584877   | -0.584877   |
| 226245_at    | 284252 KC1D1     | Hs.526630 | potassium channel tetramerisation domain          | 2.2463393 | 0.5837879  | -0.5837879  |
| 209283_at    | 1410 CRYAB       | Hs.53454  | crystallin, alpha B                               | 2.2460623 | 0.58369875 | -0.5836992  |
| 202965_s_at  | 827 CAPN6        | Hs.496593 | calpain 6                                         | 2.2458522 | 0.5836315  | -0.5836315  |
| 213194_at    | 6091 ROBO1       | Hs.13640  | roundabout, axon guidance receptor, homolog       | 2.2446442 | 0.58324337 | -0.58324337 |
| 225757_s_at  | 79789 CLMN       | Hs.301478 | calmin (calponin-like, transmembrane)             | 2.2427294 | 0.5826278  | -0.5826278  |
| 1552257_a_at | 23170 TTLL12     | Hs.517670 | tubulin tyrosine ligase-like family, member       | 2.2419808 | 0.582387   | -0.582387   |
| 1553413_at   | 80078 FLJ13744   |           | hypothetical FLJ13744                             | 2.2419217 | 0.5823679  | -0.5823679  |
| 215129_at    | 5288 PIK3C2G     | Hs.22500  | phosphoinositide-3-kinase, class 2, gamma         | 2.2409332 | 0.58204985 | -0.58204985 |
| 203153_at    | 3434 IFIT1       | Hs.20315  | interferon-induced protein with tetratricopeptide | 2.2402904 | 0.5818429  | -0.5818429  |
| 225667_s_at  | 151354 FAM84A    | Hs.260855 | family with sequence similarity 84, member        | 2.2401645 | 0.58180237 | -0.58180237 |
| 205626_s_at  | 793 CALB1        | Hs.65425  | calbindin 1, 28kDa                                | 2.2355847 | 0.5803261  | -0.5803261  |
| 201170_s_at  | 8553 BHLHE40     | Hs.171825 | basic helix-loop-helix family, member e40         | 2.2350438 | 0.58015156 | -0.58015156 |
| 209211_at    | 688 KLF5         | Hs.508234 | Kruppel-like factor 5 (intestinal)                | 2.2346435 | 0.58002186 | -0.5800228  |
| 204653_at    | 7020 TFAP2A      | Hs.519880 | transcription factor AP-2 alpha (activating)      | 2.234453  | 0.5799608  | -0.5799608  |
| 235775_at    | 160335 TMTC2     | Hs.577775 | transmembrane and tetratricopeptide repeat        | 2.2342002 | 0.5798793  | -0.5798793  |
| 230205_at    | 93134 ZNF561     | Hs.720081 | zinc finger protein 561                           | 2.233611  | 0.579689   | -0.579689   |
| 226122_at    | 57480 PLEKHG1    | Hs.189781 | pleckstrin homology domain containing, family     | 2.2332716 | 0.57957935 | -0.57957935 |
| 205016_at    | 7039 TGFA        | Hs.170009 | transforming growth factor, alpha                 | 2.2319698 | 0.5791588  | -0.5791588  |
| 226021_at    | 157506 RDH10     | Hs.724648 | retinol dehydrogenase 10 (all-trans)              | 2.231891  | 0.57913303 | -0.5791335  |

|             |                        |           |                                             |           |            |             |
|-------------|------------------------|-----------|---------------------------------------------|-----------|------------|-------------|
| 205777_at   | 1852 DUSP9             | Hs.605100 | dual specificity phosphatase 9              | 2.2315936 | 0.5790372  | -0.5790372  |
| 200666_s_at | 3337 DNAJB1            | Hs.515210 | DnaJ (Hsp40) homolog, subfamily B, mer      | 2.2308075 | 0.57878304 | -0.57878304 |
| 204717_s_at | 3177 SLC29A2           | Hs.569017 | solute carrier family 29 (nucleoside transp | 2.2306106 | 0.5787196  | -0.57871914 |
| 209193_at   | 5292 PIM1              | Hs.81170  | pim-1 oncogene                              | 2.229996  | 0.5785208  | -0.5785203  |
| 238805_at   | 91894 C11orf52         | Hs.97013  | chromosome 11 open reading frame 52         | 2.2255876 | 0.5770931  | -0.5770931  |
| 220520_s_at | 54830 NUP62CL          | Hs.163629 | nucleoporin 62kDa C-terminal like           | 2.224264  | 0.576664   | -0.576664   |
| 206561_s_at | 57016 AKR1B10          | Hs.116724 | aldo-keto reductase family 1, member B10    | 2.2228527 | 0.5762062  | -0.5762062  |
| 209684_at   | 54453 RIN2             | Hs.472270 | Ras and Rab interactor 2                    | 2.2221756 | 0.57598686 | -0.5759859  |
| 222457_s_at | 51474 LIMA1            | Hs.525419 | LIM domain and actin binding 1              | 2.2208612 | 0.5755596  | -0.5755596  |
| 218532_s_at | 54463 FAM134B          | Hs.481704 | family with sequence similarity 134, mem    | 2.2204208 | 0.57541656 | -0.57541656 |
| 1562247_at  | 286058 LOC286058       |           | hypothetical protein LOC286058              | 2.219803  | 0.5752158  | -0.5752158  |
| 223058_at   | 83641 FAM107B          | Hs.446315 | family with sequence similarity 107, mem    | 2.2188473 | 0.5749054  | -0.5749049  |
| 216243_s_at | 3557 IL1RN             | Hs.81134  | interleukin 1 receptor antagonist           | 2.2126348 | 0.57288265 | -0.57288265 |
| 213929_at   | 23086 EXPH5            | Hs.28540  | exophilin 5                                 | 2.2118874 | 0.572639   | -0.572639   |
| 227088_at   | 8654 PDE5A             | Hs.647971 | phosphodiesterase 5A, cGMP-specific         | 2.211063  | 0.57237005 | -0.57237005 |
| 225436_at   | 58489 FAM108C1         | Hs.459072 | family with sequence similarity 108, mem    | 2.2109942 | 0.57234764 | -0.57234764 |
| 221664_s_at | 50848 F11R             | Hs.517293 | F11 receptor                                | 2.2077024 | 0.57127285 | -0.57127285 |
| 224097_s_at | 50848 F11R             | Hs.517293 | F11 receptor                                | 2.2073083 | 0.5711441  | -0.5711441  |
| 205660_at   | 8638 OASL              | Hs.118633 | 2'-5'-oligoadenylate synthetase-like        | 2.207153  | 0.57109356 | -0.5710931  |
| 227920_at   | 57673 BEND3            | Hs.418045 | BEN domain containing 3                     | 2.206816  | 0.57098293 | -0.5709834  |
| 1555800_at  | 151126 ZNF385B         | Hs.655005 | zinc finger protein 385B                    | 2.2056572 | 0.5706043  | -0.5706043  |
| 209873_s_at | 11187 PKP3             | Hs.534395 | plakophilin 3                               | 2.205354  | 0.57050514 | -0.57050514 |
| 229887_at   | 259173 ALS2CL          | Hs.517937 | ALS2 C-terminal like                        | 2.2047703 | 0.5703144  | -0.57031393 |
| 225095_at   | 9517 SPTLC2            | Hs.435661 | Serine palmitoyltransferase, long chain ba  | 2.2032318 | 0.56981087 | -0.5698104  |
| 205455_at   | 4486 MST1R             | Hs.517973 | macrophage stimulating 1 receptor (c-met    | 2.1977806 | 0.5680237  | -0.5680237  |
| 226908_at   | 121227 LRIG3           | Hs.724654 | leucine-rich repeats and immunoglobulin-    | 2.1961648 | 0.56749344 | -0.56749296 |
| 207096_at   | 6291 SAA4              | Hs.654493 | serum amyloid A4, constitutive              | 2.195268  | 0.5671983  | -0.56719875 |
| 232666_at   | 4940 OAS3              | Hs.528634 | 2'-5'-oligoadenylate synthetase 3, 100kDa   | 2.194163  | 0.5668354  | -0.5668354  |
| 230006_s_at | 258010 SVIP            | Hs.349096 | small VCP/p97-interacting protein           | 2.1922798 | 0.566216   | -0.566216   |
| 1569044_at  | 55561 CDC42BPG         | Hs.293590 | CDC42 binding protein kinase gamma (D       | 2.1893082 | 0.5652375  | -0.5652375  |
| 202016_at   | 4232 MEST              | Hs.270978 | mesoderm specific transcript homolog (m     | 2.1881318 | 0.56484985 | -0.56484985 |
| 223949_at   | 64699 TMPRSS3          | Hs.208600 | transmembrane protease, serine 3            | 2.1859343 | 0.56412506 | -0.56412506 |
| 218931_at   | 64284 RAB17            | Hs.44278  | RAB17, member RAS oncogene family           | 2.1842508 | 0.56356907 | -0.56356955 |
| 229415_at   | 54205 CYCS             | Hs.437060 | cytochrome c, somatic                       | 2.184116  | 0.5635247  | -0.5635247  |
| 205375_at   | 4188 MDFI              | Hs.520119 | MyoD family inhibitor                       | 2.1803164 | 0.56226873 | -0.56226873 |
| 213506_at   | 2150 F2RL1             | Hs.154299 | coagulation factor II (thrombin) receptor-I | 2.1791103 | 0.5618696  | -0.5618696  |
| 1555827_at  | 57018 CCNL1            | Hs.4859   | Cyclin L1                                   | 2.1782355 | 0.5615797  | -0.5615802  |
| 214519_s_at | 6019 RLN2              | Hs.127032 | relaxin 2                                   | 2.1770103 | 0.5611739  | -0.5611744  |
| 207768_at   | 1961 EGR4              | Hs.3052   | early growth response 4                     | 2.176516  | 0.56101036 | -0.56101036 |
| 1569114_at  | 100506847 LOC100506847 |           | hypothetical LOC100506847                   | 2.175968  | 0.5608287  | -0.5608287  |
| 227970_at   | 80045 GPR157           | Hs.632367 | G protein-coupled receptor 157              | 2.1756647 | 0.5607281  | -0.5607281  |
| 227642_at   | 29842 TFCEP2L1         | Hs.156471 | transcription factor CP2-like 1             | 2.1752043 | 0.5605755  | -0.5605755  |
| 213912_at   | 23329 TBC1D30          | Hs.192492 | TBC1 domain family, member 30               | 2.1750994 | 0.5605407  | -0.5605407  |

|              |                  |           |                                             |           |            |             |
|--------------|------------------|-----------|---------------------------------------------|-----------|------------|-------------|
| 235688_s_at  | 9618 TRAF4       | Hs.8375   | TNF receptor-associated factor 4            | 2.1744626 | 0.56032944 | -0.56032944 |
| 229823_at    | 9699 RIMS2       | Hs.655271 | regulating synaptic membrane exocytosis     | 2.1686962 | 0.558414   | -0.558414   |
| 226029_at    | 57216 VANGL2     | Hs.99477  | vang-like 2 (van gogh, Drosophila)          | 2.16668   | 0.5577431  | -0.5577431  |
| 211056_s_at  | 6715 SRD5A1      | Hs.552    | steroid-5-alpha-reductase, alpha polypepti  | 2.1654315 | 0.5573273  | -0.5573273  |
| 1554026_a_at | 4651 MYO10       | Hs.481720 | myosin X                                    | 2.1654315 | 0.5573273  | -0.5573273  |
| 204348_s_at  | 205 AK4          | Hs.10862  | adenylate kinase 4                          | 2.164298  | 0.5569496  | -0.5569496  |
| 210004_at    | 4973 OLR1        | Hs.412484 | oxidized low density lipoprotein (lectin-li | 2.1624944 | 0.5563483  | -0.5563481  |
| 222946_s_at  | 79000 C1orf135   | Hs.149305 | chromosome 1 open reading frame 135         | 2.1612637 | 0.55593777 | -0.5559373  |
| 236058_at    | 126695 C1orf172  | Hs.188881 | chromosome 1 open reading frame 172         | 2.1609528 | 0.5558338  | -0.5558338  |
| 211756_at    | 5744 PTHLH       | Hs.591159 | parathyroid hormone-like hormone            | 2.1609104 | 0.5558195  | -0.55581975 |
| 1555372_at   | 10018 BCL2L11    | Hs.469658 | BCL2-like 11 (apoptosis facilitator)        | 2.1606102 | 0.5557194  | -0.5557194  |
| 225407_at    | 4155 MBP         | Hs.551713 | myelin basic protein                        | 2.159283  | 0.5552759  | -0.5552764  |
| 228462_at    | 153572 IRX2      | Hs.282089 | iroquois homeobox 2                         | 2.1585944 | 0.5550461  | -0.5550461  |
| 222940_at    | 6783 SULT1E1     | Hs.479898 | sulfotransferase family 1E, estrogen-prefe  | 2.1580951 | 0.5548792  | -0.5548792  |
| 221485_at    | 9334 B4GALT5     | Hs.370487 | UDP-Gal:betaGlcNAc beta 1,4- galactosy      | 2.1558535 | 0.5541296  | -0.5541296  |
| 240000_at    |                  | Hs.599720 |                                             | 2.1552436 | 0.5539255  | -0.5539255  |
| 212510_at    | 23171 GPD1L      | Hs.82432  | glycerol-3-phosphate dehydrogenase 1-lik    | 2.149257  | 0.551919   | -0.551919   |
| 203641_s_at  | 22837 COBLL1     | Hs.470457 | COBL-like 1                                 | 2.143342  | 0.54993105 | -0.54993105 |
| 1558256_at   | 148189 LOC148189 | Hs.565253 | hypothetical LOC148189                      | 2.1431394 | 0.54986286 | -0.54986286 |
| 204347_at    | 205 AK4          | Hs.10862  | adenylate kinase 4                          | 2.142553  | 0.54966545 | -0.54966545 |
| 218647_s_at  | 79693 YRDC       | Hs.301564 | yrnC domain containing (E. coli)            | 2.141004  | 0.5491438  | -0.5491438  |
| 213540_at    | 7923 HSD17B8     | Hs.415058 | hydroxysteroid (17-beta) dehydrogenase 8    | 2.1403985 | 0.5489397  | -0.5489397  |
| 210582_s_at  | 3985 LIMK2       | Hs.474596 | LIM domain kinase 2                         | 2.1397166 | 0.54870987 | -0.54870987 |
| 35666_at     | 6405 SEMA3F      | Hs.32981  | sema domain, immunoglobulin domain (Iq      | 2.1393886 | 0.54859924 | -0.54859924 |
| 202081_at    | 9592 IER2        | Hs.501629 | immediate early response 2                  | 2.1357162 | 0.5473604  | -0.54735947 |
| 207847_s_at  | 4582 MUC1        | Hs.89603  | mucin 1, cell surface associated            | 2.133254  | 0.54652786 | -0.54652786 |
| 209099_x_at  | 182 JAG1         | Hs.724464 | jagged 1                                    | 2.1326506 | 0.5463238  | -0.5463238  |
| 231399_at    | 117177 RAB3IP    | Hs.258209 | RAB3A interacting protein (rabin3)          | 2.1324024 | 0.54623985 | -0.54623985 |
| 213237_at    | 400506 C16orf88  | Hs.585209 | chromosome 16 open reading frame 88         | 2.1313236 | 0.5458746  | -0.5458751  |
| 221665_s_at  | 54869 EPS8L1     | Hs.438862 | EPS8-like 1                                 | 2.1312122 | 0.5458369  | -0.5458374  |
| 232244_at    | 57462 KIAA1161   | Hs.522083 | KIAA1161                                    | 2.1311116 | 0.54580307 | -0.54580307 |
| 238635_at    | 64417 C5orf28    | Hs.558531 | chromosome 5 open reading frame 28          | 2.1301613 | 0.5454812  | -0.54548144 |
| 207147_at    | 1746 DLX2        | Hs.419    | distal-less homeobox 2                      | 2.1296265 | 0.5453     | -0.5453005  |
| 235907_at    | 55161 TMEM33     | Hs.31082  | transmembrane protein 33                    | 2.1280935 | 0.54478073 | -0.54478073 |
| 203108_at    | 9052 GPRC5A      | Hs.631733 | G protein-coupled receptor, family C, gro   | 2.127677  | 0.5446396  | -0.5446396  |
| 213281_at    | 3725 JUN         | Hs.723911 | Jun oncogene                                | 2.1273403 | 0.5445256  | -0.54452515 |
| 203233_at    | 3566 IL4R        | Hs.513457 | interleukin 4 receptor                      | 2.1215284 | 0.542552   | -0.542552   |
| 223681_s_at  | 10207 INADL      | Hs.478125 | InaD-like (Drosophila)                      | 2.1212506 | 0.5424576  | -0.5424576  |
| 238692_at    | 121551 BTBD11    | Hs.271272 | BTB (POZ) domain containing 11              | 2.1191845 | 0.5417547  | -0.5417545  |
| 218746_at    | 55080 TAPBPL     | Hs.504597 | TAP binding protein-like                    | 2.1141849 | 0.540051   | -0.5400505  |
| 213276_at    | 816 CAMK2B       | Hs.351887 | calcium/calmodulin-dependent protein kir    | 2.1120336 | 0.53931665 | -0.5393162  |
| 213240_s_at  | 3851 KRT4        | Hs.654610 | keratin 4                                   | 2.1112108 | 0.5390353  | -0.5390353  |
| 219250_s_at  | 23767 FLRT3      | Hs.41296  | fibronectin leucine rich transmembrane pr   | 2.110668  | 0.53884983 | -0.53884983 |



|              |               |               |           |                                              |           |            |             |
|--------------|---------------|---------------|-----------|----------------------------------------------|-----------|------------|-------------|
| 205264_at    | 10849         | CD3EAP        | Hs.710495 | CD3e molecule, epsilon associated protein    | 2.1101267 | 0.5386648  | -0.5386648  |
| 219735_s_at  | 29842         | TFCP2L1       | Hs.156471 | transcription factor CP2-like 1              | 2.1093094 | 0.5383854  | -0.5383854  |
| 213394_at    | 23005         | MAPKBP1       | Hs.513661 | mitogen-activated protein kinase binding     | 2.108659  | 0.5381632  | -0.5381627  |
| 208092_s_at  | 81553         | FAM49A        | Hs.467769 | family with sequence similarity 49, memb     | 2.1082222 | 0.53801346 | -0.53801346 |
| 201032_at    | 10904         | BLCAP         | Hs.724405 | bladder cancer associated protein            | 2.1075702 | 0.5377903  | -0.5377903  |
| 242281_at    | 2752          | GLUL          | Hs.518525 | glutamate-ammonia ligase                     | 2.104711  | 0.5368109  | -0.53681135 |
| 204060_s_at  | 5613 /// 5616 | PRKX /// PRKY | Hs.721406 | protein kinase, X-linked /// protein kinase  | 2.104535  | 0.5367508  | -0.5367508  |
| 59705_at     | 51540         | SCLY          | Hs.709612 | selenocysteine lyase                         | 2.1040852 | 0.5365963  | -0.5365968  |
| 230314_at    |               |               | Hs.663929 |                                              | 2.1006997 | 0.5354347  | -0.5354352  |
| 227756_at    | 145773        | FAM81A        | Hs.531168 | family with sequence similarity 81, memb     | 2.100424  | 0.5353403  | -0.5353403  |
| 229019_at    | 151126        | ZNF385B       | Hs.655005 | zinc finger protein 385B                     | 2.0988278 | 0.53479195 | -0.53479195 |
| 204664_at    | 250           | ALPP          | Hs.284255 | alkaline phosphatase, placental              | 2.098058  | 0.5345273  | -0.5345273  |
| 203573_s_at  | 5875          | RABGGTA       | Hs.377992 | Rab geranylgeranyltransferase, alpha subu    | 2.0974464 | 0.534317   | -0.534317   |
| 200664_s_at  | 3337          | DNAJB1        | Hs.515210 | DnaJ (Hsp40) homolog, subfamily B, mer       | 2.0972524 | 0.53425026 | -0.53425026 |
| 224801_at    | 54602         | NDFIP2        | Hs.525093 | Nedd4 family interacting protein 2           | 2.0954065 | 0.5336151  | -0.5336151  |
| 229292_at    | 57669         | EPB41L5       | Hs.654802 | erythrocyte membrane protein band 4.1 lil    | 2.095257  | 0.5335636  | -0.5335636  |
| 212096_s_at  | 57509         | MTUS1         | Hs.7946   | microtubule associated tumor suppressor      | 2.0950353 | 0.5334873  | -0.5334873  |
| 1558154_at   |               |               | Hs.670451 |                                              | 2.0943487 | 0.5332508  | -0.5332508  |
| 230015_at    | 768206        | PRCD          | Hs.634380 | progressive rod-cone degeneration            | 2.0935874 | 0.53298855 | -0.53298855 |
| 201418_s_at  | 6659          | SOX4          | Hs.643910 | SRY (sex determining region Y)-box 4         | 2.0921147 | 0.5324812  | -0.5324807  |
| 1558703_at   | 113235        | SLC46A1       | Hs.724517 | solute carrier family 46 (folate transporter | 2.0919142 | 0.5324116  | -0.53241205 |
| 1554006_a_at | 3993          | LLGL2         | Hs.514477 | lethal giant larvae homolog 2 (Drosophila    | 2.0916078 | 0.5323062  | -0.5323062  |
| 205832_at    | 51200         | CPA4          | Hs.93764  | carboxypeptidase A4                          | 2.0904634 | 0.5319114  | -0.5319114  |
| 235952_at    |               |               | Hs.622213 |                                              | 2.0903265 | 0.53186417 | -0.53186417 |
| 219623_at    | 79913         | ACTR5         | Hs.371585 | ARP5 actin-related protein 5 homolog (ye     | 2.0886366 | 0.5312805  | -0.531281   |
| 233463_at    | 166824        | RASSF6        | Hs.590920 | Ras association (RalGDS/AF-6) domain f       | 2.087562  | 0.53090954 | -0.53090954 |
| 237159_x_at  | 130340        | APIS3         | Hs.632555 | adaptor-related protein complex 1, sigma     | 2.08677   | 0.53063583 | -0.53063583 |
| 229163_at    | 55450         | CAMK2N1       | Hs.197922 | calcium/calmodulin-dependent protein kir     | 2.0839622 | 0.5296645  | -0.5296645  |
| 227399_at    | 389136        | VGLL3         | Hs.724577 | vestigial like 3 (Drosophila)                | 2.0837817 | 0.52960205 | -0.52960205 |
| 219496_at    | 65124         | ANKRD57       | Hs.355455 | ankyrin repeat domain 57                     | 2.0813587 | 0.5287628  | -0.5287628  |
| 209441_at    | 23221         | RHOBTB2       | Hs.372688 | Rho-related BTB domain containing 2          | 2.0799723 | 0.52828217 | -0.52828217 |
| 204654_s_at  | 7020          | TFAP2A        | Hs.519880 | transcription factor AP-2 alpha (activating  | 2.0795956 | 0.5281515  | -0.5281515  |
| 226926_at    | 93099         | DMKN          | Hs.417795 | dermokine                                    | 2.0795805 | 0.52814627 | -0.52814627 |
| 214193_s_at  | 27042         | C1orf107      | Hs.194754 | chromosome 1 open reading frame 107          | 2.0794086 | 0.52808666 | -0.52808666 |
| 207981_s_at  | 2104          | ESRRG         | Hs.444225 | estrogen-related receptor gamma              | 2.078921  | 0.5279174  | -0.5279176  |
| 228706_s_at  | 137075        | CLDN23        | Hs.183617 | claudin 23                                   | 2.0786138 | 0.52781105 | -0.5278106  |
| 211828_s_at  | 23043         | TNIK          | Hs.34024  | TRAF2 and NCK interacting kinase             | 2.0755985 | 0.52676344 | -0.5267639  |
| 210020_x_at  | 810           | CALML3        | Hs.239600 | calmodulin-like 3                            | 2.075221  | 0.5266323  | -0.5266328  |
| 243754_at    |               |               | Hs.561094 |                                              | 2.074255  | 0.5262966  | -0.5262966  |
| 201847_at    | 3988          | LIPA          | Hs.643030 | lipase A, lysosomal acid, cholesterol ester  | 2.0737736 | 0.5261297  | -0.52612877 |
| 219821_s_at  | 54438         | GFOD1         | Hs.484686 | glucose-fructose oxidoreductase domain c     | 2.072813  | 0.525795   | -0.525795   |
| 215808_at    | 5655          | KLK10         | Hs.275464 | kallikrein-related peptidase 10              | 2.0724034 | 0.5256524  | -0.5256524  |
| 222994_at    | 25824         | PRDX5         | Hs.502823 | peroxiredoxin 5                              | 2.0699553 | 0.5248003  | -0.52479935 |

|              |                |           |                                            |           |            |             |
|--------------|----------------|-----------|--------------------------------------------|-----------|------------|-------------|
| 228988_at    | 7552 ZNF711    | Hs.326801 | zinc finger protein 711                    | 2.0684655 | 0.52428055 | -0.5242803  |
| 217080_s_at  | 9455 HOMER2    | Hs.578443 | homer homolog 2 (Drosophila)               | 2.0673053 | 0.5238757  | -0.5238757  |
| 242473_at    | 9618 TRAF4     | Hs.8375   | TNF receptor-associated factor 4           | 2.0665483 | 0.52361155 | -0.52361155 |
| 228846_at    | 4084 MXD1      | Hs.468908 | MAX dimerization protein 1                 | 2.0657542 | 0.5233345  | -0.523334   |
| 224802_at    | 54602 NDFIP2   | Hs.525093 | Nedd4 family interacting protein 2         | 2.064537  | 0.52290916 | -0.52290916 |
| 1555564_a_at | 3426 CFI       | Hs.312485 | complement factor I                        | 2.0638998 | 0.5226865  | -0.5226865  |
| 218942_at    | 79837 PIP4K2C  | Hs.144502 | phosphatidylinositol-5-phosphate 4-kinase  | 2.0635002 | 0.52254677 | -0.52254677 |
| 1556134_a_at | 84002 B3GNT5   | Hs.718506 | UDP-GlcNAc:betaGal beta-1,3-N-acetylgl     | 2.062656  | 0.5222516  | -0.5222516  |
| 241950_at    | 23286 WWC1     | Hs.484047 | WW and C2 domain containing 1              | 2.0583231 | 0.5207348  | -0.5207348  |
| 218511_s_at  | 55163 PNPO     | Hs.631742 | pyridoxamine 5'-phosphate oxidase          | 2.058258  | 0.5207119  | -0.5207119  |
| 206653_at    | 10622 POLR3G   | Hs.282387 | polymerase (RNA) III (DNA directed) po     | 2.0557668 | 0.51983833 | -0.51983833 |
| 1557521_a_at |                | Hs.595233 |                                            | 2.0502508 | 0.5179     | -0.51790047 |
| 224458_at    | 84302 C9orf125 | Hs.655738 | chromosome 9 open reading frame 125        | 2.0502136 | 0.5178871  | -0.5178871  |
| 219185_at    | 23408 SIRT5    | Hs.567431 | sirtuin 5                                  | 2.0472126 | 0.51683044 | -0.51683044 |
| 243869_at    |                | Hs.709930 |                                            | 2.0444016 | 0.5158396  | -0.5158391  |
| 35820_at     | 2760 GM2A      | Hs.483873 | GM2 ganglioside activator                  | 2.043943  | 0.51567745 | -0.51567745 |
| 1559776_at   |                | Hs.595177 |                                            | 2.0439322 | 0.51567364 | -0.51567364 |
| 232533_at    | 79828 METTL8   | Hs.135146 | methyltransferase like 8                   | 2.041959  | 0.514977   | -0.514977   |
| 236101_at    |                | Hs.444612 |                                            | 2.041486  | 0.5148096  | -0.5148101  |
| 229139_at    | 56704 JPH1     | Hs.657367 | junctophilin 1                             | 2.0410805 | 0.51466656 | -0.51466656 |
| 213109_at    | 23043 TNIK     | Hs.34024  | TRAF2 and NCK interacting kinase           | 2.038363  | 0.51370525 | -0.51370573 |
| 1568932_at   |                | Hs.582552 |                                            | 2.03784   | 0.51352024 | -0.5135205  |
| 220144_s_at  | 63926 ANKRD5   | Hs.70903  | ankyrin repeat domain 5                    | 2.0377507 | 0.51348877 | -0.51348877 |
| 210136_at    | 4155 MBP       | Hs.551713 | myelin basic protein                       | 2.037045  | 0.5132389  | -0.5132389  |
| 1557078_at   | 162394 SLFN5   | Hs.709347 | schlafen family member 5                   | 2.0369387 | 0.51320124 | -0.51320124 |
| 230361_at    | 727957 HEATR7A | Hs.443139 | HEAT repeat containing 7A                  | 2.036272  | 0.5129652  | -0.5129652  |
| 37512_at     | 8630 HSD17B6   | Hs.524513 | hydroxysteroid (17-beta) dehydrogenase 6   | 2.03367   | 0.5120425  | -0.512043   |
| 213693_s_at  | 4582 MUC1      | Hs.89603  | mucin 1, cell surface associated           | 2.0299985 | 0.5107393  | -0.5107393  |
| 206919_at    | 2005 ELK4      | Hs.497520 | ELK4, ETS-domain protein (SRF accesso      | 2.0295584 | 0.5105829  | -0.5105829  |
| 235200_at    | 93134 ZNF561   | Hs.720081 | zinc finger protein 561                    | 2.0294015 | 0.51052713 | -0.51052713 |
| 216251_s_at  | 23170 TTLL12   | Hs.517670 | tubulin tyrosine ligase-like family, membe | 2.0285096 | 0.51021004 | -0.51021004 |
| 212737_at    | 2760 GM2A      | Hs.483873 | GM2 ganglioside activator                  | 2.0283165 | 0.5101414  | -0.5101414  |
| 222392_x_at  | 64065 PERP     | Hs.201446 | PERP, TP53 apoptosis effector              | 2.0281918 | 0.5100975  | -0.51009655 |
| 207045_at    | 55610 CCDC132  | Hs.222282 | coiled-coil domain containing 132          | 2.0278337 | 0.5099697  | -0.5099697  |
| 242100_at    | 337876 CHSY3   | Hs.213137 | chondroitin sulfate synthase 3             | 2.0269465 | 0.50965405 | -0.50965405 |
| 221291_at    | 80328 ULBP2    | Hs.656778 | UL16 binding protein 2                     | 2.0243268 | 0.5087209  | -0.50872135 |
| 206284_x_at  | 1212 CLTB      | Hs.484241 | clathrin, light chain B                    | 2.0217934 | 0.50781727 | -0.5078182  |
| 225450_at    | 154810 AMOTL1  | Hs.503594 | angiomin like 1                            | 2.0212467 | 0.5076227  | -0.5076227  |
| 209667_at    | 8824 CES2      | Hs.282975 | carboxylesterase 2                         | 2.0211346 | 0.50758266 | -0.50758266 |
| 207291_at    | 79056 PRRG4    | Hs.471695 | proline rich Gla (G-carboxyglutamic acid)  | 2.0206056 | 0.50739384 | -0.50739384 |
| 218816_at    | 55227 LRRC1    | Hs.606493 | leucine rich repeat containing 1           | 2.0205066 | 0.50735855 | -0.50735855 |
| 227228_s_at  | 440193 CCDC88C | Hs.525536 | coiled-coil domain containing 88C          | 2.020213  | 0.50725365 | -0.50725365 |
| 225316_at    | 84879 MFSD2A   | Hs.655177 | major facilitator superfamily domain cont  | 2.0181468 | 0.5065155  | -0.5065155  |

|             |           |              |           |                                             |            |             |             |
|-------------|-----------|--------------|-----------|---------------------------------------------|------------|-------------|-------------|
| 230792_at   | 158584    | FAAH2        | Hs.724714 | fatty acid amide hydrolase 2                | 2.0180845  | 0.5064931   | -0.50649357 |
| 219300_s_at | 26047     | CNTNAP2      | Hs.655684 | contactin associated protein-like 2         | 2.0174484  | 0.50626564  | -0.5062661  |
| 205227_at   | 3556      | IL1RAP       | Hs.478673 | interleukin 1 receptor accessory protein    | 2.0144014  | 0.5051756   | -0.5051756  |
| 207826_s_at | 3399      | ID3          | Hs.76884  | inhibitor of DNA binding 3, dominant neg    | 2.012458   | 0.5044794   | -0.5044794  |
| 241751_at   | 8481      | OFD1         | Hs.6483   | oral-facial-digital syndrome 1              | 2.0118756  | 0.50427055  | -0.50427055 |
| 210347_s_at | 53335     | BCL11A       | Hs.370549 | B-cell CLL/lymphoma 11A (zinc finger p      | 2.011676   | 0.504199    | -0.504199   |
| 240331_at   |           |              | Hs.658892 |                                             | 2.0113623  | 0.5040865   | -0.5040865  |
| 243087_at   | 126820    | WDR63        | Hs.97933  | WD repeat domain 63                         | 2.0107243  | 0.5038576   | -0.5038576  |
| 215425_at   | 10950     | BTG3         | Hs.473420 | BTG family, member 3                        | 2.0087075  | 0.5031338   | -0.5031338  |
| 225140_at   | 51274     | KLF3         | Hs.298658 | Kruppel-like factor 3 (basic)               | 2.0080497  | 0.50289726  | -0.50289774 |
| 225726_s_at | 57475     | PLEKHH1      | Hs.594236 | pleckstrin homology domain containing, f    | 2.0076084  | 0.50273895  | -0.50273895 |
| 226725_at   |           |              | Hs.14691  |                                             | 2.007534   | 0.50271225  | -0.50271225 |
| 225606_at   | 10018     | BCL2L11      | Hs.469658 | BCL2-like 11 (apoptosis facilitator)        | 2.00742    | 0.50267124  | -0.50267124 |
| 200965_s_at | 3983      | ABLIM1       | Hs.438236 | actin binding LIM protein 1                 | 2.0060616  | 0.50218296  | -0.50218296 |
| 218966_at   | 55930     | MYO5C        | Hs.487036 | myosin VC                                   | 2.005595   | 0.5020151   | -0.5020151  |
| 244546_at   | 54205     | CYCS         | Hs.437060 | cytochrome c, somatic                       | 2.0054598  | 0.5019665   | -0.5019665  |
| 242417_at   | 283278    | LOC283278    |           | hypothetical protein LOC283278              | 2.0048075  | 0.5017319   | -0.5017319  |
| 231001_at   | 387758    | FIBIN        | Hs.712718 | fin bud initiation factor homolog (zebrafis | 2.0029955  | 0.50107956  | -0.50107956 |
| 220865_s_at | 23590     | PDSS1        | Hs.558468 | prenyl (decaprenyl) diphosphate synthase,   | 2.0024023  | 0.50086594  | -0.50086594 |
| 214866_at   | 5329      | PLAUR        | Hs.466871 | plasminogen activator, urokinase receptor   | 2.0020616  | 0.5007429   | -0.5007434  |
| 227357_at   | 257397    | TAB3         | Hs.188256 | TGF-beta activated kinase 1/MAP3K7 bi       | 2.0006347  | 0.5002289   | -0.5002289  |
| 222449_at   | 56937     | PMEPA1       | Hs.517155 | prostate transmembrane protein, androgen    | -2.0013702 | -0.500494   | 0.500494    |
| 212223_at   | 3423      | IDS          | Hs.460960 | iduronate 2-sulfatase                       | -2.0022299 | -0.50082874 | 0.50082874  |
| 205756_s_at | 2157      | F8           | Hs.654450 | coagulation factor VIII, procoagulant com   | -2.0024288 | -0.5008755  | 0.5008755   |
| 211354_s_at | 3953      | LEPR         | Hs.723178 | leptin receptor                             | -2.0026035 | -0.5009384  | 0.5009384   |
| 1553194_at  | 257194    | NEGR1        | Hs.146542 | neuronal growth regulator 1                 | -2.0027986 | -0.50100875 | 0.5010085   |
| 221031_s_at | 81575     | APOLD1       | Hs.23388  | apolipoprotein L domain containing 1        | -2.0033107 | -0.50119305 | 0.50119305  |
| 242186_x_at | 23284     | LPHN3        | Hs.28391  | latrophilin 3                               | -2.0036745 | -0.50132394 | 0.5013242   |
| 212977_at   | 57007     | CXCR7        | Hs.471751 | chemokine (C-X-C motif) receptor 7          | -2.0038764 | -0.5013969  | 0.50139666  |
| 232481_s_at | 84189     | SLITRK6      | Hs.525105 | SLIT and NTRK-like family, member 6         | -2.003978  | -0.5014334  | 0.5014334   |
| 201849_at   | 664       | BNIP3        | Hs.144873 | BCL2/adenovirus E1B 19kDa interacting       | -2.0042562 | -0.5015335  | 0.5015335   |
| 235518_at   | 6546      | SLC8A1       | Hs.31961  | solute carrier family 8 (sodium/calcium ex  | -2.0046446 | -0.5016732  | 0.5016732   |
| 235931_at   | 151194    | FAM119A      | Hs.664764 | family with sequence similarity 119, mem    | -2.0048552 | -0.50174904 | 0.50174904  |
| 214830_at   | 145389    | SLC38A6      | Hs.200738 | solute carrier family 38, member 6          | -2.004903  | -0.5017662  | 0.5017662   |
| 242918_at   | 4678      | NASP         | Hs.319334 | Nuclear autoantigenic sperm protein (hist   | -2.0073059 | -0.50263023 | 0.50263023  |
| 227425_at   | 9185      | REPS2        | Hs.186810 | RALBP1 associated Eps domain containi       | -2.0080452 | -0.50289583 | 0.50289583  |
| 233599_at   | 728061    | LOC728061    | Hs.655858 | hCG2003663                                  | -2.008219  | -0.5029583  | 0.5029583   |
| 243041_s_at |           |              | Hs.705969 |                                             | -2.0085456 | -0.5030756  | 0.5030756   |
| 214890_s_at | 25854     | FAM149A      | Hs.357025 | family with sequence similarity 149, mem    | -2.0092998 | -0.50334644 | 0.50334644  |
| 227061_at   | 100506621 | LOC100506621 |           | hypothetical LOC100506621                   | -2.0093756 | -0.5033736  | 0.5033736   |
| 201506_at   | 7045      | TGFBI        | Hs.369397 | transforming growth factor, beta-induced,   | -2.009547  | -0.50343513 | 0.50343513  |
| 241739_at   | 55239     | OGFOD1       | Hs.231883 | 2-oxoglutarate and iron-dependent oxyger    | -2.010251  | -0.50368786 | 0.50368786  |
| 232451_at   |           |              | Hs.216701 |                                             | -2.0124428 | -0.50447416 | 0.5044737   |

|              |                              |           |                                            |            |             |            |
|--------------|------------------------------|-----------|--------------------------------------------|------------|-------------|------------|
| 201367_s_at  | 678 ZFP36L2                  | Hs.503093 | zinc finger protein 36, C3H type-like 2    | -2.0126045 | -0.50453186 | 0.50453186 |
| 201108_s_at  | 7057 THBS1                   | Hs.164226 | thrombospondin 1                           | -2.013861  | -0.504982   | 0.504982   |
| 1558569_at   | 100131541 LOC100131541       | Hs.661972 | Hypothetical LOC100131541                  | -2.0140438 | -0.5050478  | 0.5050473  |
| 215369_at    |                              | Hs.649599 |                                            | -2.0141451 | -0.50508356 | 0.50508404 |
| 239571_at    |                              | Hs.674250 |                                            | -2.0153604 | -0.5055189  | 0.5055189  |
| 1556827_at   | 339929 LOC339929             | Hs.596639 | hypothetical LOC339929                     | -2.0155962 | -0.5056033  | 0.5056033  |
| 236495_at    |                              | Hs.666584 |                                            | -2.0157108 | -0.5056443  | 0.5056443  |
| 244128_x_at  | 148979 GLIS1                 | Hs.306691 | GLIS family zinc finger 1                  | -2.015726  | -0.50564957 | 0.50565004 |
| 201125_s_at  | 3693 ITGB5                   | Hs.536663 | integrin, beta 5                           | -2.0160053 | -0.5057497  | 0.5057497  |
| 212221_x_at  | 3423 IDS                     | Hs.460960 | iduronate 2-sulfatase                      | -2.0166345 | -0.50597477 | 0.50597477 |
| 206002_at    | 10149 GPR64                  | Hs.146978 | G protein-coupled receptor 64              | -2.0175865 | -0.50631523 | 0.50631523 |
| 201539_s_at  | 2273 FHL1                    | Hs.435369 | four and a half LIM domains 1              | -2.0180225 | -0.50647116 | 0.50647116 |
| 239952_at    | 6935 ZEB1                    | Hs.124503 | zinc finger E-box binding homeobox 1       | -2.0182998 | -0.5065701  | 0.50657034 |
| 224996_at    | 444 ASPH                     | Hs.332422 | aspartate beta-hydroxylase                 | -2.0187204 | -0.50672054 | 0.50672054 |
| 236962_at    |                              | Hs.598907 |                                            | -2.021359  | -0.5076628  | 0.5076628  |
| 204719_at    | 10351 ABCA8                  | Hs.58351  | ATP-binding cassette, sub-family A (ABC    | -2.0214057 | -0.50767946 | 0.50767946 |
| 227892_at    | 5563 PRKAA2                  | Hs.437039 | protein kinase, AMP-activated, alpha 2 ca  | -2.0214057 | -0.50767946 | 0.50767946 |
| 235172_at    |                              | Hs.655009 |                                            | -2.0219703 | -0.50788116 | 0.5078807  |
| 202378_s_at  | 54741 LEPROT                 | Hs.23581  | leptin receptor overlapping transcript     | -2.0222757 | -0.5079899  | 0.5079899  |
| 1555892_s_at | 253039 LOC253039             | Hs.594170 | hypothetical LOC253039                     | -2.0226755 | -0.50813246 | 0.50813246 |
| 205730_s_at  | 22885 ABLIM3                 | Hs.49688  | actin binding LIM protein family, membe    | -2.0246098 | -0.50882244 | 0.5088215  |
| 201279_s_at  | 1601 DAB2                    | Hs.481980 | disabled homolog 2, mitogen-responsive p   | -2.025235  | -0.50904465 | 0.50904465 |
| 228986_at    | 114882 OSBPL8                | Hs.430849 | oxysterol binding protein-like 8           | -2.0252376 | -0.5090456  | 0.5090456  |
| 227179_at    | 27067 STAU2                  | Hs.561815 | staufen, RNA binding protein, homolog 2    | -2.0257144 | -0.50921535 | 0.50921535 |
| 206652_at    | 9205 ZMYM5                   | Hs.530988 | zinc finger, MYM-type 5                    | -2.0267081 | -0.50956917 | 0.50956917 |
| 236521_at    |                              | Hs.95034  |                                            | -2.0271623 | -0.5097308  | 0.5097308  |
| 233543_s_at  | 84142 FAM175A                | Hs.334772 | family with sequence similarity 175, mem   | -2.027492  | -0.5098481  | 0.5098481  |
| 221478_at    | 665 BNIP3L                   | Hs.131226 | BCL2/adenovirus E1B 19kDa interacting      | -2.0275927 | -0.5098839  | 0.5098839  |
| 208025_s_at  | 8091 HMGA2                   | Hs.505924 | high mobility group AT-hook 2              | -2.028539  | -0.5102205  | 0.5102205  |
| 240728_at    | 5332 PLCB4                   | Hs.472101 | Phospholipase C, beta 4                    | -2.0304682 | -0.5109062  | 0.5109062  |
| 239121_at    |                              | Hs.687708 |                                            | -2.0306675 | -0.5109768  | 0.51097727 |
| 1558426_x_at | 80228 ORAI2                  | Hs.363308 | ORAI calcium release-activated calcium i   | -2.0315719 | -0.5112982  | 0.5112982  |
| 206042_x_at  | 6638 /// 8926 SNRPN /// SNU1 | Hs.555970 | small nuclear ribonucleoprotein polypepti  | -2.0316658 | -0.51133156 | 0.51133156 |
| 212312_at    | 598 BCL2L1                   | Hs.516966 | BCL2-like 1                                | -2.0325174 | -0.5116339  | 0.5116339  |
| 209392_at    | 5168 ENPP2                   | Hs.190977 | ectonucleotide pyrophosphatase/phosphoc    | -2.033441  | -0.5119617  | 0.51196146 |
| 214438_at    | 3142 HLX                     | Hs.74870  | H2.0-like homeobox                         | -2.0339153 | -0.5121298  | 0.5121298  |
| 205198_s_at  | 538 ATP7A                    | Hs.496414 | ATPase, Cu++ transporting, alpha polype    | -2.0348613 | -0.5124655  | 0.512465   |
| 210875_s_at  | 6935 ZEB1                    | Hs.124503 | zinc finger E-box binding homeobox 1       | -2.0350733 | -0.51254034 | 0.51254034 |
| 1556339_a_at |                              | Hs.662144 |                                            | -2.0354607 | -0.51267767 | 0.51267767 |
| 204392_at    | 8536 CAMK1                   | Hs.434875 | calcium/calmodulin-dependent protein kir   | -2.0357203 | -0.5127697  | 0.5127697  |
| 223690_at    | 4053 LTBP2                   | Hs.512776 | latent transforming growth factor beta bin | -2.036482  | -0.5130396  | 0.5130396  |
| 238536_at    |                              | Hs.231861 |                                            | -2.0369399 | -0.5132017  | 0.5132017  |
| 242443_at    | 161436 EML5                  | Hs.724508 | Echinoderm microtubule associated protei   | -2.039233  | -0.5140133  | 0.5140133  |

|              |                        |           |                                           |            |             |            |
|--------------|------------------------|-----------|-------------------------------------------|------------|-------------|------------|
| 221556_at    | 8555 CDC14B            | Hs.40582  | CDC14 cell division cycle 14 homolog B    | -2.039427  | -0.51408195 | 0.51408195 |
| 207574_s_at  | 4616 GADD45B           | Hs.110571 | growth arrest and DNA-damage-inducible    | -2.0409226 | -0.5146103  | 0.51461124 |
| 212636_at    | 9444 QKI               | Hs.510324 | quaking homolog, KH domain RNA bindi      | -2.0416818 | -0.51487875 | 0.5148792  |
| 209135_at    | 444 ASPH               | Hs.332422 | aspartate beta-hydroxylase                | -2.0418875 | -0.5149517  | 0.5149517  |
| 205579_at    | 3269 HRH1              | Hs.1570   | histamine receptor H1                     | -2.0424383 | -0.51514626 | 0.51514626 |
| 205447_s_at  | 7786 MAP3K12           | Hs.713539 | mitogen-activated protein kinase kinase k | -2.0426085 | -0.51520634 | 0.51520634 |
| 216218_s_at  | 23228 PLCL2            | Hs.723937 | phospholipase C-like 2                    | -2.0453255 | -0.51616526 | 0.51616526 |
| 242068_at    |                        | Hs.603603 |                                           | -2.0459936 | -0.5164008  | 0.5164008  |
| 230472_at    | 79192 IRX1             | Hs.424156 | iroquois homeobox 1                       | -2.0462277 | -0.5164833  | 0.5164833  |
| 212043_at    | 10618 TGOLN2           | Hs.593382 | trans-golgi network protein 2             | -2.0479665 | -0.51709557 | 0.5170965  |
| 203827_at    | 55062 WIPI1            | Hs.463964 | WD repeat domain, phosphoinositide inte   | -2.0486963 | -0.51735306 | 0.51735306 |
| 1569583_at   | 2069 EREG              | Hs.115263 | epiregulin                                | -2.0488365 | -0.5174022  | 0.51740265 |
| 223568_s_at  | 84513 PPAPDC1B         | Hs.567619 | phosphatidic acid phosphatase type 2 dor  | -2.0502515 | -0.51790047 | 0.51790047 |
| 238456_at    | 100289230 LOC100289230 | Hs.552095 | hypothetical LOC100289230                 | -2.050417  | -0.51795864 | 0.51795864 |
| 244263_at    |                        |           |                                           | -2.050913  | -0.51813316 | 0.51813316 |
| 214036_at    | 1946 EFNA5             | Hs.288741 | ephrin-A5                                 | -2.051686  | -0.51840496 | 0.51840496 |
| 240139_at    |                        | Hs.601985 |                                           | -2.052746  | -0.5187774  | 0.51877785 |
| 222444_at    | 51566 ARMCX3           | Hs.592225 | armadillo repeat containing, X-linked 3   | -2.0542238 | -0.51929665 | 0.51929665 |
| 233262_at    |                        | Hs.560364 |                                           | -2.0542238 | -0.51929665 | 0.51929665 |
| 227261_at    | 11278 KLF12            | Hs.373857 | Kruppel-like factor 12                    | -2.0542727 | -0.5193138  | 0.5193138  |
| 242320_at    |                        | Hs.680761 |                                           | -2.0548458 | -0.51951504 | 0.51951504 |
| 226204_at    | 79680 C22orf29         |           | chromosome 22 open reading frame 29       | -2.0549407 | -0.5195484  | 0.5195484  |
| 213836_s_at  | 55062 WIPI1            | Hs.463964 | WD repeat domain, phosphoinositide inte   | -2.0549707 | -0.5195589  | 0.5195589  |
| 210282_at    | 7750 ZMYM2             | Hs.644041 | zinc finger, MYM-type 2                   | -2.0589485 | -0.52095413 | 0.52095366 |
| 238317_x_at  |                        |           |                                           | -2.0595896 | -0.5211787  | 0.52117825 |
| 225602_at    | 152007 GLIPR2          | Hs.493819 | GLI pathogenesis-related 2                | -2.0609033 | -0.5216384  | 0.5216384  |
| 238774_at    |                        |           |                                           | -2.0610456 | -0.52168846 | 0.521688   |
| 1556416_s_at |                        | Hs.684703 |                                           | -2.061086  | -0.5217023  | 0.5217023  |
| 238751_at    |                        | Hs.481342 |                                           | -2.0624583 | -0.52218246 | 0.52218246 |
| 238712_at    |                        | Hs.656379 |                                           | -2.062639  | -0.5222459  | 0.5222454  |
| 227826_s_at  |                        | Hs.481342 |                                           | -2.0638998 | -0.5226865  | 0.5226865  |
| 224444_s_at  | 84791 C1orf97          |           | chromosome 1 open reading frame 97        | -2.0651622 | -0.52312756 | 0.52312756 |
| 229576_s_at  | 6926 TBX3              | Hs.129895 | T-box 3                                   | -2.0652707 | -0.5231657  | 0.5231652  |
| 201468_s_at  | 1728 NQO1              | Hs.406515 | NAD(P)H dehydrogenase, quinone 1          | -2.0656838 | -0.5233097  | 0.5233097  |
| 1316_at      | 7067 THRA              | Hs.724    | thyroid hormone receptor, alpha (erythro  | -2.0659711 | -0.5234103  | 0.52340984 |
| 239065_at    |                        | Hs.596765 |                                           | -2.0665455 | -0.5236106  | 0.5236106  |
| 238129_s_at  |                        | Hs.597264 |                                           | -2.067327  | -0.52388334 | 0.52388334 |
| 228568_at    | 145781 GCOM1           | Hs.437256 | GRINL1A complex locus                     | -2.0673456 | -0.52388954 | 0.52389    |
| 226043_at    | 26086 GPSM1            | Hs.239370 | G-protein signaling modulator 1           | -2.0674405 | -0.5239229  | 0.5239229  |
| 219316_s_at  | 55640 FLVCR2           | Hs.509966 | feline leukemia virus subgroup C cellular | -2.067858  | -0.52406836 | 0.52406883 |
| 240018_at    |                        | Hs.513672 |                                           | -2.069506  | -0.5246434  | 0.52464294 |
| 236545_at    |                        | Hs.662933 |                                           | -2.0709805 | -0.525157   | 0.525157   |
| 240788_at    |                        | Hs.656597 |                                           | -2.0714748 | -0.5253291  | 0.5253291  |

|              |                  |           |                                             |            |             |            |
|--------------|------------------|-----------|---------------------------------------------|------------|-------------|------------|
| 225562_at    | 22821 RASA3      | Hs.593075 | RAS p21 protein activator 3                 | -2.0724623 | -0.5256729  | 0.5256729  |
| 238736_at    | 5980 REV3L       | Hs.232021 | REV3-like, catalytic subunit of DNA poly    | -2.077584  | -0.5274534  | 0.5274534  |
| 214505_s_at  | 2273 FHL1        | Hs.435369 | four and a half LIM domains 1               | -2.0779433 | -0.52757835 | 0.5275779  |
| 244407_at    | 51302 CYP39A1    | Hs.387367 | cytochrome P450, family 39, subfamily A     | -2.0784454 | -0.5277524  | 0.5277524  |
| 241685_x_at  |                  | Hs.200938 |                                             | -2.0793605 | -0.52807    | 0.52807    |
| 211432_s_at  | 7301 TYRO3       | Hs.381282 | TYRO3 protein tyrosine kinase               | -2.080789  | -0.5285654  | 0.5285654  |
| 213030_s_at  | 5362 PLXNA2      | Hs.497626 | plexin A2                                   | -2.081144  | -0.52868843 | 0.52868843 |
| 225747_at    | 93058 COQ10A     | Hs.4096   | coenzyme Q10 homolog A (S. cerevisiae)      | -2.0812554 | -0.52872705 | 0.52872705 |
| 229497_at    | 348094 ANKDD1A   | Hs.207157 | ankyrin repeat and death domain containi    | -2.0814753 | -0.5288031  | 0.52880335 |
| 229254_at    | 148808 MFSD4     | Hs.567714 | major facilitator superfamily domain cont   | -2.0815845 | -0.528841   | 0.528841   |
| 241782_at    | 10529 NEBL       | Hs.5025   | nebulette                                   | -2.0823627 | -0.52911043 | 0.5291109  |
| 202620_s_at  | 5352 PLOD2       | Hs.477866 | procollagen-lysine, 2-oxoglutarate 5-dioxy  | -2.0843492 | -0.5297985  | 0.5297985  |
| 236322_at    |                  | Hs.661081 |                                             | -2.0845408 | -0.5298648  | 0.5298648  |
| 213309_at    | 23228 PLCL2      | Hs.723937 | phospholipase C-like 2                      | -2.0854304 | -0.53017235 | 0.5301728  |
| 242908_x_at  |                  | Hs.23187  |                                             | -2.0859978 | -0.5303688  | 0.5303688  |
| 221011_s_at  | 81606 LBH        | Hs.567598 | limb bud and heart development homolog      | -2.0867453 | -0.53062725 | 0.53062725 |
| 221004_s_at  | 81618 ITM2C      | Hs.111577 | integral membrane protein 2C                | -2.087035  | -0.5307274  | 0.5307274  |
| 236520_at    |                  | Hs.655785 |                                             | -2.087562  | -0.53090954 | 0.53090954 |
| 226665_at    | 130872 AHSA2     | Hs.655602 | AHA1, activator of heat shock 90kDa pro     | -2.0894341 | -0.5315561  | 0.5315561  |
| 213555_at    | 112611 RWDD2A    | Hs.709686 | RWD domain containing 2A                    | -2.090268  | -0.53184414 | 0.53184366 |
| 242879_x_at  |                  |           |                                             | -2.091202  | -0.5321665  | 0.532166   |
| 244117_at    |                  | Hs.657231 |                                             | -2.0937002 | -0.53302765 | 0.5330272  |
| 224549_x_at  |                  |           |                                             | -2.0951352 | -0.53352165 | 0.53352165 |
| 1553768_a_at | 285761 DCBLD1    | Hs.658304 | discoidin, CUB and LCCL domain containi     | -2.0960267 | -0.53382826 | 0.53382874 |
| 225685_at    | 10602 CDC42EP3   | Hs.369574 | CDC42 effector protein (Rho GTPase bin      | -2.097341  | -0.5342808  | 0.5342808  |
| 215322_at    |                  | Hs.671978 |                                             | -2.0977995 | -0.5344386  | 0.53443813 |
| 209539_at    | 9459 ARHGEF6     | Hs.522795 | Rac/Cdc42 guanine nucleotide exchange f     | -2.0996919 | -0.53508854 | 0.535089   |
| 220750_s_at  | 64175 LEPRE1     | Hs.720014 | leucine proline-enriched proteoglycan (lep  | -2.100383  | -0.5353265  | 0.535326   |
| 220609_at    | 202181 LOC202181 |           | hypothetical LOC202181                      | -2.1008308 | -0.53548    | 0.53548    |
| 215469_at    |                  | Hs.137567 |                                             | -2.1018727 | -0.53583765 | 0.53583765 |
| 241710_at    | 728819 LOC728819 | Hs.602756 | hCG1645220                                  | -2.1020145 | -0.5358863  | 0.5358863  |
| 202125_s_at  | 66008 TRAK2      | Hs.152774 | trafficking protein, kinesin binding 2      | -2.1031666 | -0.5362816  | 0.5362816  |
| 226267_at    | 122953 JDP2      | Hs.196482 | Jun dimerization protein 2                  | -2.104483  | -0.53673315 | 0.5367327  |
| 1558683_a_at | 8091 HMGA2       | Hs.505924 | high mobility group AT-hook 2               | -2.1047103 | -0.5368109  | 0.5368109  |
| 223438_s_at  | 5465 PPARA       | Hs.103110 | peroxisome proliferator-activated receptor  | -2.1047251 | -0.53681564 | 0.5368161  |
| 227080_at    | 90874 ZNF697     | Hs.381105 | zinc finger protein 697                     | -2.1049635 | -0.53689766 | 0.53689766 |
| 237387_at    |                  | Hs.673912 |                                             | -2.1050847 | -0.53693914 | 0.53693914 |
| 219610_at    | 64283 RGNEF      | Hs.482521 | 190 kDa guanine nucleotide exchange fac     | -2.1056428 | -0.53713036 | 0.53713036 |
| 205803_s_at  | 7220 TRPC1       | Hs.250687 | transient receptor potential cation channel | -2.1062171 | -0.5373273  | 0.5373268  |
| 1563745_a_at | 283050 LOC283050 | Hs.309176 | hypothetical LOC283050                      | -2.1076133 | -0.5378051  | 0.5378051  |
| 242438_at    | 171023 ASXL1     | Hs.374043 | additional sex combs like 1 (Drosophila)    | -2.1089303 | -0.5382557  | 0.5382557  |
| 221078_s_at  | 55704 CCDC88A    | Hs.292925 | coiled-coil domain containing 88A           | -2.1100905 | -0.5386524  | 0.5386524  |
| 1559910_at   |                  | Hs.655648 |                                             | -2.1101093 | -0.5386586  | 0.5386591  |

|             |                        |           |                                            |            |             |            |
|-------------|------------------------|-----------|--------------------------------------------|------------|-------------|------------|
| 237577_at   | 57092 PCNP             | Hs.275865 | PEST proteolytic signal containing nuclea  | -2.1105843 | -0.5388212  | 0.5388212  |
| 228160_at   | 339290 LOC339290       |           | hypothetical LOC339290                     | -2.1106575 | -0.5388465  | 0.538846   |
| 235729_at   | 84874 ZNF514           | Hs.655109 | zinc finger protein 514                    | -2.110924  | -0.5389371  | 0.53893757 |
| 1562775_at  | 83594 NUDT12           | Hs.434289 | nudix (nucleoside diphosphate linked moi   | -2.1109865 | -0.5389588  | 0.53895855 |
| 213012_at   | 4734 NEDD4             | Hs.1565   | neural precursor cell expressed, developm  | -2.1113489 | -0.5390825  | 0.5390825  |
| 220744_s_at | 55764 IFT122           | Hs.655284 | intraflagellar transport 122 homolog (Chl  | -2.1138291 | -0.5399294  | 0.5399294  |
| 213763_at   | 28996 HIPK2            | Hs.724392 | homeodomain interacting protein kinase 2   | -2.1144552 | -0.540143   | 0.540143   |
| 211352_s_at | 8202 NCOA3             | Hs.592142 | nuclear receptor coactivator 3             | -2.1149669 | -0.54031754 | 0.54031754 |
| 235537_at   | 54940 OCIAD1           | Hs.518750 | OCIA domain containing 1                   | -2.1151786 | -0.54039    | 0.54038954 |
| 205379_at   | 874 CBR3               | Hs.154510 | carbonyl reductase 3                       | -2.1153276 | -0.54044056 | 0.54044056 |
| 236795_at   |                        | Hs.634209 |                                            | -2.1160276 | -0.54067945 | 0.540679   |
| 215407_s_at | 23245 ASTN2            | Hs.601562 | astrotactin 2                              | -2.1162732 | -0.5407629  | 0.5407629  |
| 237189_at   | 100506360 LOC100506360 |           | hypothetical LOC100506360                  | -2.1162739 | -0.5407634  | 0.5407629  |
| 214321_at   | 4856 NOV               | Hs.235935 | nephroblastoma overexpressed gene          | -2.116772  | -0.54093313 | 0.54093266 |
| 218546_at   | 79762 C1orf115         | Hs.519839 | chromosome 1 open reading frame 115        | -2.1187506 | -0.5416069  | 0.5416069  |
| 219654_at   | 9200 PTPLA             | Hs.114062 | protein tyrosine phosphatase-like (proline | -2.1189916 | -0.5416889  | 0.5416889  |
| 1568605_at  | 8629 JRK               | Hs.535903 | jerky homolog (mouse)                      | -2.120205  | -0.54210186 | 0.54210186 |
| 33148_at    | 51663 ZFR              | Hs.435231 | zinc finger RNA binding protein            | -2.121405  | -0.54251003 | 0.54251003 |
| 223870_at   | 10517 FBXW10           | Hs.592128 | F-box and WD repeat domain containing      | -2.122227  | -0.54278946 | 0.54278946 |
| 224771_at   | 89796 NAV1             | Hs.585374 | neuron navigator 1                         | -2.122934  | -0.5430298  | 0.5430298  |
| 224410_s_at | 64327 LMBR1            | Hs.209989 | limb region 1 homolog (mouse)              | -2.123588  | -0.543252   | 0.543252   |
| 1559528_at  | 100129917 LOC100129917 | Hs.711523 | hypothetical LOC100129917                  | -2.1248238 | -0.5436716  | 0.5436716  |
| 214464_at   | 8476 CDC42BPA          | Hs.35433  | CDC42 binding protein kinase alpha (DM     | -2.125723  | -0.5439768  | 0.5439768  |
| 223041_at   | 83692 CD99L2           | Hs.522805 | CD99 molecule-like 2                       | -2.126673  | -0.5442991  | 0.5442991  |
| 205234_at   | 9122 SLC16A4           | Hs.551306 | solute carrier family 16, member 4 (mono-  | -2.1269796 | -0.5444031  | 0.5444031  |
| 209465_x_at | 5764 PTN               | Hs.371249 | pleiotrophin                               | -2.127244  | -0.5444927  | 0.5444927  |
| 214999_s_at | 9727 RAB11FIP3         | Hs.531642 | RAB11 family interacting protein 3 (class  | -2.12731   | -0.54451513 | 0.54451513 |
| 205500_at   | 727 C5                 | Hs.494997 | complement component 5                     | -2.1282833 | -0.5448451  | 0.5448451  |
| 220825_s_at | 55243 KIRREL           | Hs.609291 | kin of IRRE like (Drosophila)              | -2.128289  | -0.544847   | 0.544847   |
| 202701_at   | 649 BMP1               | Hs.1274   | bone morphogenetic protein 1               | -2.12898   | -0.54508114 | 0.54508114 |
| 236610_at   |                        | Hs.591763 |                                            | -2.1322014 | -0.54617167 | 0.54617214 |
| 219682_s_at | 6926 TBX3              | Hs.129895 | T-box 3                                    | -2.1322114 | -0.546175   | 0.5461755  |
| 200756_x_at | 813 CALU               | Hs.724446 | calumenin                                  | -2.1324306 | -0.5462494  | 0.5462494  |
| 243149_at   |                        | Hs.669156 |                                            | -2.132931  | -0.54641867 | 0.54641867 |
| 229831_at   | 5067 CNTN3             | Hs.12723  | contactin 3 (plasmacytoma associated)      | -2.133835  | -0.5467243  | 0.5467243  |
| 244181_at   |                        |           |                                            | -2.1357303 | -0.5473647  | 0.5473647  |
| 214068_at   | 146227 BEAN1           | Hs.97805  | brain expressed, associated with NEDD4,    | -2.1385741 | -0.5483246  | 0.5483246  |
| 238716_at   | 619423 FAM85A          |           | family with sequence similarity 85, memb   | -2.1386766 | -0.5483589  | 0.5483594  |
| 227828_s_at | 84141 FAM176A          | Hs.302346 | family with sequence similarity 176, mem   | -2.1388624 | -0.54842186 | 0.54842186 |
| 205876_at   | 3977 LIFR              | Hs.133421 | leukemia inhibitory factor receptor alpha  | -2.1400447 | -0.5488205  | 0.5488205  |
| 202832_at   | 9648 GCC2              | Hs.436505 | GRIP and coiled-coil domain containing 2   | -2.1402485 | -0.54888916 | 0.54888916 |
| 239649_at   |                        |           |                                            | -2.1406822 | -0.5490351  | 0.54903555 |
| 239830_at   |                        |           |                                            | -2.1438253 | -0.55009365 | 0.55009365 |

|              |                  |           |                                             |            |             |            |
|--------------|------------------|-----------|---------------------------------------------|------------|-------------|------------|
| 1564139_at   | 144571 LOC144571 | Hs.592432 | hypothetical LOC144571                      | -2.1439216 | -0.5501261  | 0.5501261  |
| 225224_at    | 140688 C20orf112 | Hs.516978 | chromosome 20 open reading frame 112        | -2.1442902 | -0.55025005 | 0.55025005 |
| 230364_at    | 56994 CHPT1      | Hs.293077 | choline phosphotransferase 1                | -2.1453288 | -0.5505996  | 0.5505991  |
| 225045_at    | 55704 CCDC88A    | Hs.292925 | coiled-coil domain containing 88A           | -2.1454082 | -0.5506263  | 0.5506258  |
| 204642_at    | 1901 S1PR1       | Hs.154210 | sphingosine-1-phosphate receptor 1          | -2.1463954 | -0.55095816 | 0.5509577  |
| 211966_at    | 1284 COL4A2      | Hs.508716 | collagen, type IV, alpha 2                  | -2.146726  | -0.5510688  | 0.55106926 |
| 242024_at    |                  | Hs.656132 |                                             | -2.1468132 | -0.55109835 | 0.55109835 |
| 230860_at    | 84984 C3orf34    | Hs.282800 | chromosome 3 open reading frame 34          | -2.1468651 | -0.5511155  | 0.551116   |
| 214048_at    | 8930 MBD4        | Hs.35947  | methyl-CpG binding domain protein 4         | -2.147195  | -0.5512266  | 0.5512266  |
| 1555349_a_at | 3689 ITGB2       | Hs.375957 | integrin, beta 2 (complement component 3)   | -2.1488798 | -0.55179214 | 0.5517926  |
| 223441_at    | 26503 SLC17A5    | Hs.597422 | solute carrier family 17 (anion/sugar trans | -2.1514516 | -0.5526552  | 0.5526552  |
| 208763_s_at  | 1831 TSC22D3     | Hs.522074 | TSC22 domain family, member 3               | -2.152934  | -0.5531521  | 0.5531521  |
| 213103_at    | 90627 STARD13    | Hs.507704 | StAR-related lipid transfer (START) dom     | -2.1531646 | -0.55322933 | 0.55322933 |
| 202718_at    | 3485 IGFBP2      | Hs.438102 | insulin-like growth factor binding protein  | -2.1544397 | -0.5536561  | 0.5536566  |
| 228618_at    | 375033 PEAR1     | Hs.142003 | platelet endothelial aggregation receptor 1 | -2.1552436 | -0.5539255  | 0.5539255  |
| 202923_s_at  | 2729 GCLC        | Hs.654465 | glutamate-cysteine ligase, catalytic subun  | -2.1552522 | -0.5539284  | 0.5539284  |
| 230503_at    |                  | Hs.656734 |                                             | -2.1559477 | -0.5541611  | 0.5541611  |
| 222866_s_at  | 55640 FLVCR2     | Hs.509966 | feline leukemia virus subgroup C cellular   | -2.1567338 | -0.5544238  | 0.5544243  |
| 222771_s_at  | 50804 MYEF2      | Hs.6638   | myelin expression factor 2                  | -2.1568265 | -0.5544553  | 0.5544548  |
| 232021_at    | 283464 GXYL1     | Hs.259347 | glucoside xylosyltransferase 1              | -2.1571772 | -0.5545726  | 0.5545721  |
| 227341_at    | 222389 BEND7     | Hs.498740 | BEN domain containing 7                     | -2.1571915 | -0.55457735 | 0.5545769  |
| 1562288_at   |                  | Hs.535143 |                                             | -2.1573348 | -0.55462503 | 0.55462503 |
| 224002_s_at  | 51661 FKBP7      | Hs.410378 | FK506 binding protein 7                     | -2.1577163 | -0.5547528  | 0.55475235 |
| 212107_s_at  | 1660 DHX9        | Hs.191518 | DEAH (Asp-Glu-Ala-His) box polypeptid       | -2.157769  | -0.55477    | 0.55477047 |
| 238419_at    | 90102 PHLDB2     | Hs.477114 | pleckstrin homology-like domain, family 1   | -2.1581962 | -0.55491304 | 0.55491304 |
| 243541_at    | 133396 IL31RA    | Hs.55378  | interleukin 31 receptor A                   | -2.1601946 | -0.5555806  | 0.5555806  |
| 216048_s_at  | 22836 RHOBTB3    | Hs.445030 | Rho-related BTB domain containing 3         | -2.1609116 | -0.55582    | 0.55582    |
| 226995_at    | 642852 LOC642852 | Hs.11637  | hypothetical LOC642852                      | -2.1616344 | -0.55606127 | 0.55606127 |
| 225290_at    | 55500 ETNK1      | Hs.29464  | ethanolamine kinase 1                       | -2.161713  | -0.5560875  | 0.5560875  |
| 1554250_s_at | 375593 TRIM73    | Hs.661254 | tripartite motif-containing 73              | -2.1618345 | -0.556128   | 0.556128   |
| 227148_at    | 130271 PLEKHH2   | Hs.164162 | pleckstrin homology domain containing, f    | -2.1625175 | -0.55635595 | 0.55635595 |
| 202761_s_at  | 23224 SYNE2      | Hs.525392 | spectrin repeat containing, nuclear envelo  | -2.1633098 | -0.55661964 | 0.5566206  |
| 212335_at    | 2799 GNS         | Hs.334534 | glucosamine (N-acetyl)-6-sulfatase          | -2.164092  | -0.55688095 | 0.55688095 |
| 235959_at    |                  | Hs.709640 |                                             | -2.166491  | -0.55768013 | 0.55768013 |
| 238206_at    | 59350 RXFP1      | Hs.591686 | relaxin/insulin-like family peptide receptc | -2.167281  | -0.55794334 | 0.55794287 |
| 241395_at    | 4817 NIT1        | Hs.517342 | nitrilase 1                                 | -2.1691062 | -0.55855036 | 0.55855036 |
| 204646_at    | 1806 DPYD        | Hs.335034 | dihydropyrimidine dehydrogenase             | -2.1692224 | -0.558589   | 0.558589   |
| 228643_at    |                  | Hs.503429 |                                             | -2.1693695 | -0.5586376  | 0.5586381  |
| 217878_s_at  | 996 CDC27        | Hs.463295 | cell division cycle 27 homolog (S. cerevis  | -2.1701174 | -0.5588865  | 0.5588865  |
| 1553158_at   | 84984 C3orf34    | Hs.282800 | chromosome 3 open reading frame 34          | -2.1703584 | -0.55896664 | 0.55896664 |
| 241844_x_at  | 80008 TMEM156    | Hs.374147 | transmembrane protein 156                   | -2.1724842 | -0.55967283 | 0.55967283 |
| 224229_s_at  | 10000 AKT3       | Hs.498292 | v-akt murine thymoma viral oncogene hor     | -2.1727147 | -0.5597491  | 0.5597496  |
| 209094_at    | 23576 DDAH1      | Hs.724433 | dimethylarginine dimethylaminohydrolase     | -2.173267  | -0.5599327  | 0.5599327  |



|             |        |           |                |            |             |            |
|-------------|--------|-----------|----------------|------------|-------------|------------|
| 242865_at   |        |           |                | -2.1742384 | -0.56025505 | 0.56025505 |
| 231136_at   | 407032 | MIR30C2   | microRNA 30c-2 | -2.1773932 | -0.56130123 | 0.56130075 |
| 240485_at   |        |           |                | -2.1782348 | -0.5615797  | 0.5615797  |
| 203066_at   | 51363  | CHST15    | Hs.287537      | -2.1784334 | -0.5616455  | 0.5616455  |
| 203300_x_at | 8905   | APIS2     | Hs.653504      | -2.1785572 | -0.5616865  | 0.5616865  |
| 244697_at   |        |           |                | -2.1785572 | -0.5616865  | 0.5616865  |
| 217641_at   | 64582  | GPR135    | Hs.647573      | -2.1788108 | -0.56177044 | 0.56177044 |
| 242028_at   | 163051 | ZNF709    | Hs.631623      | -2.180087  | -0.5621929  | 0.5621929  |
| 232293_at   | 254251 | LCORL     | Hs.446201      | -2.1808858 | -0.5624571  | 0.5624571  |
| 202391_at   | 10409  | BASP1     | Hs.201641      | -2.1809738 | -0.56248665 | 0.5624857  |
| 1560703_at  | 201229 | C17orf108 | Hs.724502      | -2.1829326 | -0.56313396 | 0.5631337  |
| 225420_at   | 57678  | GPAM      | Hs.42586       | -2.1836755 | -0.5633793  | 0.5633793  |
| 231130_at   | 51661  | FKBP7     | Hs.410378      | -2.1851752 | -0.5638747  | 0.56387424 |
| 1556619_at  | 729993 | SHISA9    | Hs.724830      | -2.185423  | -0.56395626 | 0.56395626 |
| 231067_s_at | 9590   | AKAP12    | Hs.371240      | -2.1859314 | -0.5641241  | 0.5641241  |
| 206819_at   | 29774  | POM121L9P | Hs.534980      | -2.1874506 | -0.56462526 | 0.56462526 |
| 203758_at   | 1519   | CTSO      | Hs.75262       | -2.1885087 | -0.5649743  | 0.56497383 |
| 223888_s_at | 51520  | LARS      | Hs.432674      | -2.189283  | -0.56522894 | 0.5652294  |
| 234282_at   |        |           | Hs.543773      | -2.189692  | -0.5653641  | 0.5653639  |
| 239519_at   |        |           | Hs.687190      | -2.1912048 | -0.5658622  | 0.5658622  |
| 225656_at   | 114327 | EFHC1     | Hs.403171      | -2.19132   | -0.5659003  | 0.56589985 |
| 223286_at   | 23587  | C17orf81  | Hs.417029      | -2.192719  | -0.5663605  | 0.5663605  |
| 241400_at   |        |           |                | -2.1928554 | -0.5664053  | 0.5664053  |
| 215242_at   | 5279   | PIGC      | Hs.188456      | -2.1937468 | -0.56669855 | 0.56669855 |
| 212609_s_at | 10000  | AKT3      | Hs.498292      | -2.1944127 | -0.5669174  | 0.5669174  |
| 228345_at   | 53344  | CHIC1     | Hs.496323      | -2.1949625 | -0.56709814 | 0.56709814 |
| 238447_at   | 27303  | RBMS3     | Hs.696468      | -2.1964908 | -0.56760025 | 0.56760025 |
| 206665_s_at | 598    | BCL2L1    | Hs.516966      | -2.1973505 | -0.56788254 | 0.56788254 |
| 236649_at   | 56986  | DTWD1     | Hs.127432      | -2.198693  | -0.56832314 | 0.56832314 |
| 210191_s_at | 10745  | PHTF1     | Hs.655824      | -2.1991343 | -0.5684676  | 0.5684681  |
| 217599_s_at | 29969  | MDFIC     | Hs.427236      | -2.1996796 | -0.56864643 | 0.5686469  |
| 201626_at   | 3638   | INSIG1    | Hs.520819      | -2.2003682 | -0.56887245 | 0.56887245 |
| 237813_at   | 5094   | PCBP2     | Hs.546271      | -2.2009747 | -0.5690713  | 0.5690713  |
| 206675_s_at | 6498   | SKIL      | Hs.581632      | -2.202158  | -0.56945896 | 0.56945896 |
| 237716_at   |        |           |                | -2.2022066 | -0.5694747  | 0.5694752  |
| 233109_at   | 1303   | COL12A1   | Hs.101302      | -2.202324  | -0.5695133  | 0.5695133  |
| 206135_at   | 9705   | ST18      | Hs.655499      | -2.2054298 | -0.57052994 | 0.57052994 |
| 207290_at   | 5362   | PLXNA2    | Hs.497626      | -2.2056456 | -0.5706005  | 0.5706005  |
| 210194_at   | 22925  | PLA2R1    | Hs.410477      | -2.2056708 | -0.57060885 | 0.5706086  |
| 207020_at   | 11077  | HSF2BP    | Hs.406157      | -2.2059257 | -0.57069206 | 0.57069206 |
| 43511_s_at  |        |           | Hs.568928      | -2.2078922 | -0.57133484 | 0.57133484 |
| 213416_at   | 3676   | ITGA4     | Hs.440955      | -2.2089272 | -0.5716729  | 0.5716729  |
| 206746_at   | 631    | BFSP1     | Hs.129702      | -2.2091548 | -0.5717473  | 0.5717473  |

|              |                                                |           |                                            |            |             |            |
|--------------|------------------------------------------------|-----------|--------------------------------------------|------------|-------------|------------|
| 220512_at    | 10395 DLC1                                     | Hs.134296 | deleted in liver cancer 1                  | -2.209999  | -0.5720229  | 0.5720229  |
| 204796_at    | 2009 EML1                                      | Hs.12451  | echinoderm microtubule associated protei   | -2.2105982 | -0.5722184  | 0.5722184  |
| 220441_at    | 79962 DNAJC22                                  | Hs.659300 | DnaJ (Hsp40) homolog, subfamily C, mer     | -2.2110527 | -0.5723667  | 0.5723667  |
| 239058_at    | 2303 FOXC2                                     | Hs.436448 | Forkhead box C2 (MFH-1, mesenchyme f       | -2.2120965 | -0.5727072  | 0.5727072  |
| 243368_at    |                                                | Hs.598905 |                                            | -2.2128499 | -0.57295275 | 0.57295275 |
| 204818_at    | 3294 HSD17B2                                   | Hs.162795 | hydroxysteroid (17-beta) dehydrogenase 2   | -2.2139845 | -0.5733228  | 0.5733223  |
| 229907_at    |                                                | Hs.369009 |                                            | -2.214944  | -0.5736351  | 0.5736351  |
| 219387_at    | 55704 CCDC88A                                  | Hs.292925 | coiled-coil domain containing 88A          | -2.216822  | -0.5742464  | 0.5742464  |
| 212788_x_at  | 2512 FTL                                       | Hs.433670 | ferritin, light polypeptide                | -2.2170563 | -0.5743227  | 0.5743227  |
| 203188_at    | 11041 B3GNT1                                   | Hs.8526   | UDP-GlcNAc:betaGal beta-1,3-N-acetylgl     | -2.2181382 | -0.5746746  | 0.5746746  |
| 212336_at    | 2036 EPB41L1                                   | Hs.724416 | erythrocyte membrane protein band 4.1-lil  | -2.2192624 | -0.57503986 | 0.57504034 |
| 220326_s_at  | 55701 ARHGEF40                                 | Hs.35125  | Rho guanine nucleotide exchange factor (   | -2.2204657 | -0.57543135 | 0.57543087 |
| 1566557_at   | 440465 FLJ90757                                | Hs.448889 | hypothetical LOC440465                     | -2.2207203 | -0.57551384 | 0.57551384 |
| 1569472_s_at | 7267 TTC3                                      | Hs.368214 | tetratricopeptide repeat domain 3          | -2.2248461 | -0.5768528  | 0.5768528  |
| 202479_s_at  | 28951 TRIB2                                    | Hs.467751 | tribbles homolog 2 (Drosophila)            | -2.2250211 | -0.57690954 | 0.57690954 |
| 243827_at    |                                                | Hs.601123 |                                            | -2.22582   | -0.57716846 | 0.57716846 |
| 212311_at    | 23231 SEL1L3                                   | Hs.479384 | sel-1 suppressor of lin-12-like 3 (C. eleg | -2.2296576 | -0.5784111  | 0.5784111  |
| 209867_s_at  | 23284 LPHN3                                    | Hs.570770 | latrophilin 3                              | -2.23247   | -0.57932043 | 0.57932043 |
| 1554199_at   | 5800 PTPRO                                     | Hs.160871 | protein tyrosine phosphatase, receptor typ | -2.233059  | -0.5795107  | 0.5795107  |
| 227115_at    | 100506870 /// 10 LOC100506870 /// LOC100509475 |           | hypothetical LOC100506870 /// hypotheti    | -2.2339692 | -0.5798044  | 0.5798049  |
| 221911_at    | 2115 ETV1                                      | Hs.22634  | ets variant 1                              | -2.2342846 | -0.57990646 | 0.57990646 |
| 236712_at    |                                                | Hs.55185  |                                            | -2.2346807 | -0.5800345  | 0.58003426 |
| 233825_s_at  | 83692 CD99L2                                   | Hs.522805 | CD99 molecule-like 2                       | -2.2365158 | -0.5806265  | 0.5806265  |
| 212624_s_at  | 1123 CHN1                                      | Hs.380138 | chimerin (chimaerin) 1                     | -2.2372255 | -0.58085537 | 0.58085537 |
| 216813_at    |                                                |           |                                            | -2.2389596 | -0.5814142  | 0.5814142  |
| 217858_s_at  | 51566 ARMCX3                                   | Hs.592225 | armadillo repeat containing, X-linked 3    | -2.2404919 | -0.58190775 | 0.58190775 |
| 203441_s_at  | 1000 CDH2                                      | Hs.464829 | cadherin 2, type 1, N-cadherin (neuronal)  | -2.2426434 | -0.5826001  | 0.5826001  |
| 217989_at    | 51170 HSD17B11                                 | Hs.594923 | hydroxysteroid (17-beta) dehydrogenase 1   | -2.2428198 | -0.58265686 | 0.58265686 |
| 244433_at    |                                                |           |                                            | -2.2457669 | -0.58360386 | 0.58360434 |
| 228628_at    | 653464 SRGAP2P1                                | Hs.523529 | SLIT-ROBO Rho GTPase activating prot       | -2.2475393 | -0.5841732  | 0.5841732  |
| 203184_at    | 2201 FBN2                                      | Hs.519294 | fibrillin 2                                | -2.2479496 | -0.5843048  | 0.5843048  |
| 236852_at    | 286151 FBXO43                                  | Hs.339577 | F-box protein 43                           | -2.248232  | -0.5843954  | 0.5843954  |
| 231182_at    | 7456 WIPF1                                     | Hs.128067 | WAS/WASL interacting protein family, n     | -2.2510931 | -0.58531284 | 0.58531284 |
| 203402_at    | 8514 KCNAB2                                    | Hs.440497 | potassium voltage-gated channel, shaker-1  | -2.2519927 | -0.58560085 | 0.58560133 |
| 238918_at    |                                                | Hs.276976 |                                            | -2.2520187 | -0.58560944 | 0.58560944 |
| 1562472_at   |                                                |           |                                            | -2.2528954 | -0.58589005 | 0.5858903  |
| 1557118_a_at |                                                | Hs.594897 |                                            | -2.2529376 | -0.58590364 | 0.58590364 |
| 1552799_at   | 203062 TSNARE1                                 | Hs.370931 | t-SNARE domain containing 1                | -2.2542915 | -0.5863371  | 0.5863371  |
| 220197_at    | 50617 ATP6V0A4                                 | Hs.98967  | ATPase, H+ transporting, lysosomal V0 s    | -2.2545874 | -0.586432   | 0.5864315  |
| 210519_s_at  | 1728 NQO1                                      | Hs.406515 | NAD(P)H dehydrogenase, quinone 1           | -2.255511  | -0.58672714 | 0.58672714 |
| 228392_at    | 55900 ZNF302                                   | Hs.436350 | Zinc finger protein 302                    | -2.2564795 | -0.5870371  | 0.5870366  |
| 208747_s_at  | 716 C1S                                        | Hs.458355 | complement component 1, s subcomponer      | -2.258851  | -0.5877948  | 0.5877943  |
| 238939_at    | 118 ADD1                                       | Hs.183706 | adducin 1 (alpha)                          | -2.259371  | -0.5879605  | 0.5879607  |

|              |                  |           |                                                        |            |             |            |
|--------------|------------------|-----------|--------------------------------------------------------|------------|-------------|------------|
| 242871_at    | 54852 PAQR5      | Hs.591096 | progesterone and adiponectin receptor family member 1  | -2.2624457 | -0.5889416  | 0.5889416  |
| 230064_at    |                  | Hs.650577 |                                                        | -2.2629378 | -0.58909845 | 0.58909845 |
| 1558280_s_at | 9411 ARHGAP29    | Hs.483238 | Rho GTPase activating protein 29                       | -2.2635078 | -0.5892801  | 0.5892801  |
| 1555765_a_at | 2786 GNG4        | Hs.159711 | guanine nucleotide binding protein (G protein-coupled) | -2.2661576 | -0.59012413 | 0.59012413 |
| 205535_s_at  | 5099 PCDH7       | Hs.479439 | protocadherin 7                                        | -2.2668123 | -0.5903325  | 0.5903325  |
| 236408_at    |                  | Hs.674006 |                                                        | -2.268142  | -0.59075546 | 0.59075546 |
| 221765_at    | 7357 UGCG        | Hs.304249 | UDP-glucose ceramide glucosyltransferase               | -2.2689188 | -0.59100246 | 0.59100246 |
| 209732_at    | 9976 CLEC2B      | Hs.85201  | C-type lectin domain family 2, member B                | -2.2696657 | -0.5912399  | 0.5912399  |
| 210281_s_at  | 7750 ZMYM2       | Hs.644041 | zinc finger, MYM-type 2                                | -2.2699838 | -0.591341   | 0.591341   |
| 230712_at    | 55672 NBPFL1     | Hs.467587 | neuroblastoma breakpoint family, member 1              | -2.2722297 | -0.59205437 | 0.59205437 |
| 222453_at    | 79901 CYBRD1     | Hs.723152 | cytochrome b reductase 1                               | -2.272455  | -0.5921259  | 0.5921259  |
| 238289_at    |                  |           |                                                        | -2.2725017 | -0.5921407  | 0.5921407  |
| 239540_at    |                  |           |                                                        | -2.2750673 | -0.59295464 | 0.59295464 |
| 241853_at    |                  | Hs.596355 |                                                        | -2.2768157 | -0.5935087  | 0.5935087  |
| 203348_s_at  | 2119 ETV5        | Hs.43697  | ets variant 5                                          | -2.2783482 | -0.59399414 | 0.59399414 |
| 235216_at    | 114799 ESCO1     | Hs.464733 | establishment of cohesion 1 homolog 1 (S)              | -2.2789433 | -0.5941825  | 0.5941825  |
| 1557507_at   |                  | Hs.638073 |                                                        | -2.2790985 | -0.5942316  | 0.5942316  |
| 230657_at    |                  | Hs.668532 |                                                        | -2.281039  | -0.5948453  | 0.5948453  |
| 244271_at    |                  | Hs.270314 |                                                        | -2.2813647 | -0.5949483  | 0.5949483  |
| 205383_s_at  | 26137 ZBTB20     | Hs.655108 | zinc finger and BTB domain containing 2                | -2.2814596 | -0.5949788  | 0.5949788  |
| 243102_at    |                  | Hs.655836 |                                                        | -2.284879  | -0.59605885 | 0.59605885 |
| 203088_at    | 10516 FBLN5      | Hs.723859 | fibulin 5                                              | -2.2849417 | -0.5960789  | 0.5960789  |
| 229354_at    | 57491 AHRR       |           | aryl-hydrocarbon receptor repressor                    | -2.2863164 | -0.5965128  | 0.5965128  |
| 222184_at    |                  | Hs.652769 |                                                        | -2.2866302 | -0.5966115  | 0.5966115  |
| 212909_at    | 116372 LYPD1     | Hs.432395 | LY6/PLAUR domain containing 1                          | -2.2883797 | -0.5971632  | 0.5971632  |
| 229150_at    |                  | Hs.659093 |                                                        | -2.2896385 | -0.5975599  | 0.5975599  |
| 222881_at    | 10855 HPSE       | Hs.44227  | heparanase                                             | -2.2897096 | -0.59758234 | 0.59758234 |
| 227868_at    | 154761 LOC154761 | Hs.716689 | hypothetical LOC154761                                 | -2.290256  | -0.5977545  | 0.5977545  |
| 1553994_at   | 4907 NT5E        | Hs.153952 | 5'-nucleotidase, cytosolic (CD73)                      | -2.2904136 | -0.59780407 | 0.59780407 |
| 208510_s_at  | 5468 PPARG       | Hs.162646 | peroxisome proliferator-activated receptor gamma       | -2.2905476 | -0.5978465  | 0.5978465  |
| 205633_s_at  | 211 ALAS1        | Hs.476308 | aminolevulinic acid synthase 1                         | -2.2919068 | -0.59827423 | 0.59827423 |
| 232238_at    | 259266 ASPM      | Hs.121028 | aspm (abnormal spindle) homolog, microcephalic         | -2.2924495 | -0.59844494 | 0.59844494 |
| 205006_s_at  | 9397 NMT2        | Hs.60339  | N-myristoyltransferase 2                               | -2.2930777 | -0.5986428  | 0.5986428  |
| 213484_at    |                  | Hs.66187  |                                                        | -2.293615  | -0.5988116  | 0.5988116  |
| 242163_at    | 9967 THRAP3      | Hs.160211 | thyroid hormone receptor associated protein 3          | -2.2939062 | -0.5989032  | 0.5989032  |
| 221618_s_at  | 51616 TAF9B      | Hs.592248 | TAF9B RNA polymerase II, TATA box binding protein      | -2.2939956 | -0.5989313  | 0.5989313  |
| 232797_at    |                  | Hs.656287 |                                                        | -2.294719  | -0.59915876 | 0.59915876 |
| 241762_at    |                  |           |                                                        | -2.297492  | -0.60002995 | 0.60002995 |
| 242986_at    |                  | Hs.678572 |                                                        | -2.297565  | -0.60005283 | 0.60005283 |
| 226587_at    | 6638 SNRPN       | Hs.592473 | small nuclear ribonucleoprotein polypeptide A          | -2.3008578 | -0.60108566 | 0.60108566 |
| 227771_at    | 3977 LIFR        | Hs.133421 | leukemia inhibitory factor receptor alpha              | -2.3014715 | -0.6012783  | 0.6012783  |
| 228825_at    | 22949 PTGR1      | Hs.584864 | prostaglandin reductase 1                              | -2.3017416 | -0.6013627  | 0.6013627  |
| 205079_s_at  | 8777 MPDZ        | Hs.169378 | multiple PDZ domain protein                            | -2.303371  | -0.6018734  | 0.6018734  |

|              |                                   |           |                                             |            |             |            |
|--------------|-----------------------------------|-----------|---------------------------------------------|------------|-------------|------------|
| 207626_s_at  | 6542 SLC7A2                       | Hs.448520 | solute carrier family 7 (cationic amino aci | -2.3043046 | -0.6021657  | 0.6021657  |
| 225524_at    | 118429 ANTXR2                     | Hs.162963 | anthrax toxin receptor 2                    | -2.304751  | -0.6023054  | 0.6023054  |
| 226281_at    | 92737 DNER                        | Hs.234074 | delta/notch-like EGF repeat containing      | -2.3048759 | -0.6023445  | 0.6023445  |
| 244511_at    |                                   | Hs.669666 |                                             | -2.3057544 | -0.60261965 | 0.6026192  |
| 221788_at    | 5238 PGM3                         | Hs.708038 | phosphoglucomutase 3                        | -2.3071043 | -0.60304165 | 0.60304165 |
| 222108_at    | 347902 AMIGO2                     | Hs.121520 | adhesion molecule with Ig-like domain 2     | -2.3083827 | -0.60344124 | 0.60344124 |
| 204298_s_at  | 4015 LOX                          | Hs.102267 | lysyl oxidase                               | -2.30852   | -0.60348415 | 0.60348415 |
| 242553_at    |                                   |           |                                             | -2.3169377 | -0.6061096  | 0.6061096  |
| 225112_at    | 10152 ABI2                        | Hs.471156 | abl-interactor 2                            | -2.3181818 | -0.6064968  | 0.6064968  |
| 230109_at    | 27115 PDE7B                       | Hs.594417 | phosphodiesterase 7B                        | -2.3212047 | -0.60743666 | 0.60743713 |
| 204669_s_at  | 11237 RNF24                       | Hs.589884 | ring finger protein 24                      | -2.3234692 | -0.60814047 | 0.60814    |
| 202833_s_at  | 5265 SERPINA1                     | Hs.525557 | serpin peptidase inhibitor, clade A (alpha- | -2.3272874 | -0.60932446 | 0.60932493 |
| 209568_s_at  | 23179 RGL1                        | Hs.497148 | ral guanine nucleotide dissociation stimul  | -2.3289173 | -0.6098294  | 0.6098299  |
| 201522_x_at  | 6638 /// 8926 SNRPN /// SNU1      | Hs.555970 | small nuclear ribonucleoprotein polypepti   | -2.3290658 | -0.6098757  | 0.6098757  |
| 201842_s_at  | 2202 EFEMP1                       | Hs.76224  | EGF-containing fibulin-like extracellular   | -2.3296661 | -0.61006165 | 0.61006165 |
| 1559067_a_at |                                   | Hs.595538 |                                             | -2.3297713 | -0.6100943  | 0.6100941  |
| 203925_at    | 2730 GCLM                         | Hs.315562 | glutamate-cysteine ligase, modifier subun   | -2.33426   | -0.6114826  | 0.6114826  |
| 225388_at    | 10098 TSPAN5                      | Hs.118118 | tetraspanin 5                               | -2.336066  | -0.6120405  | 0.6120405  |
| 235019_at    | 1368 CPM                          | Hs.654387 | carboxypeptidase M                          | -2.3366406 | -0.6122179  | 0.6122179  |
| 228054_at    | 93109 TMEM44                      | Hs.478729 | transmembrane protein 44                    | -2.3376818 | -0.6125393  | 0.6125393  |
| 243409_at    | 2300 FOXL1                        | Hs.533830 | forkhead box L1                             | -2.3384058 | -0.6127629  | 0.61276245 |
| 224964_s_at  | 54331 GNG2                        | Hs.187772 | guanine nucleotide binding protein (G prc   | -2.3392973 | -0.6130376  | 0.6130376  |
| 204792_s_at  | 9742 IFT140                       | Hs.389438 | intraflagellar transport 140 homolog (Chl   | -2.339976  | -0.6132469  | 0.6132469  |
| 228058_at    | 124220 ZG16B                      | Hs.105887 | zymogen granule protein 16 homolog B (r     | -2.3414948 | -0.6137152  | 0.6137147  |
| 242439_s_at  | 171023 ASXL1                      | Hs.374043 | additional sex combs like 1 (Drosophila)    | -2.3414948 | -0.6137147  | 0.6137152  |
| 205184_at    | 2786 GNG4                         | Hs.159711 | guanine nucleotide binding protein (G prc   | -2.3429914 | -0.6141758  | 0.6141758  |
| 203139_at    | 1612 DAPK1                        | Hs.380277 | death-associated protein kinase 1           | -2.3451514 | -0.6148405  | 0.6148405  |
| 225008_at    | 444 ASPH                          | Hs.332422 | aspartate beta-hydroxylase                  | -2.3453064 | -0.6148882  | 0.6148882  |
| 201109_s_at  | 7057 THBS1                        | Hs.164226 | thrombospondin 1                            | -2.3473816 | -0.6155262  | 0.6155262  |
| 202124_s_at  | 66008 TRAK2                       | Hs.152774 | trafficking protein, kinesin binding 2      | -2.347869  | -0.6156759  | 0.6156759  |
| 1557961_s_at | 100127983 LOC100127983            | Hs.642655 | hypothetical protein LOC100127983           | -2.347877  | -0.61567855 | 0.6156783  |
| 223395_at    | 25890 ABI3BP                      | Hs.477015 | ABI family, member 3 (NESH) binding p       | -2.3483222 | -0.61581516 | 0.61581516 |
| 231644_at    |                                   | Hs.200266 |                                             | -2.3496637 | -0.61622715 | 0.61622715 |
| 204041_at    | 4129 MAOB                         | Hs.654473 | monoamine oxidase B                         | -2.3512492 | -0.616714   | 0.6167135  |
| 215037_s_at  | 598 BCL2L1                        | Hs.516966 | BCL2-like 1                                 | -2.3516433 | -0.61683464 | 0.61683464 |
| 213195_at    | 201229 C17orf108                  | Hs.724502 | chromosome 17 open reading frame 108        | -2.3518486 | -0.6168976  | 0.6168976  |
| 202460_s_at  | 9663 LPIN2                        | Hs.132342 | lipin 2                                     | -2.3530054 | -0.61725235 | 0.61725235 |
| 225381_at    | 399959 LOC399959                  | Hs.44098  | hypothetical LOC399959                      | -2.3550875 | -0.61789036 | 0.61789036 |
| 1558733_at   | 253461 ZBTB38                     | Hs.518301 | zinc finger and BTB domain containing 3     | -2.3560934 | -0.6181984  | 0.6181984  |
| 229679_at    | 100510175 /// 40 C12orf76 /// LOC | Hs.44817  | chromosome 12 open reading frame 76 ///     | -2.356874  | -0.6184373  | 0.6184373  |
| 226591_at    | 6638 SNRPN                        | Hs.592473 | small nuclear ribonucleoprotein polypepti   | -2.357354  | -0.61858416 | 0.61858416 |
| 214845_s_at  | 813 CALU                          | Hs.724446 | calumenin                                   | -2.3585236 | -0.6189418  | 0.61894226 |
| 222835_at    | 79875 THSD4                       | Hs.387057 | thrombospondin, type I, domain containin    | -2.3587239 | -0.6190033  | 0.6190033  |

|              |                        |           |                                             |            |             |            |
|--------------|------------------------|-----------|---------------------------------------------|------------|-------------|------------|
| 235570_at    | 27303 RBMS3            | Hs.696468 | RNA binding motif, single stranded inter    | -2.3589017 | -0.61905766 | 0.61905766 |
| 237664_at    |                        | Hs.671789 |                                             | -2.3592527 | -0.61916494 | 0.61916494 |
| 221511_x_at  | 9236 CCPG1             | Hs.285051 | cell cycle progression 1                    | -2.3602197 | -0.6194606  | 0.6194606  |
| 201826_s_at  | 51097 SCCPDH           | Hs.498397 | saccharopine dehydrogenase (putative)       | -2.3615477 | -0.6198664  | 0.6198664  |
| 205462_s_at  | 3241 HPCAL1            | Hs.580427 | hippocalcin-like 1                          | -2.3633187 | -0.6204071  | 0.6204071  |
| 200919_at    | 1912 PHC2              | Hs.524271 | polyhomeotic homolog 2 (Drosophila)         | -2.3657446 | -0.62114716 | 0.62114716 |
| 233375_at    | 84288 EFCAB2           | Hs.134857 | EF-hand calcium binding domain 2            | -2.3681064 | -0.6218667  | 0.6218672  |
| 212143_s_at  | 3486 IGFBP3            | Hs.450230 | insulin-like growth factor binding protein  | -2.3682027 | -0.62189627 | 0.62189627 |
| 201340_s_at  | 8507 ENC1              | Hs.104925 | ectodermal-neural cortex 1 (with BTB-lik    | -2.3684554 | -0.62197304 | 0.6219735  |
| 1564475_s_at | 728723 LOC728723       | Hs.161338 | hypothetical LOC728723                      | -2.3685894 | -0.62201405 | 0.62201405 |
| 215575_at    | 9659 PDE4DIP           |           | phosphodiesterase 4D interacting protein    | -2.3706741 | -0.6226487  | 0.6226487  |
| 226633_at    | 51762 RAB8B            | Hs.389733 | RAB8B, member RAS oncogene family           | -2.3739095 | -0.62363243 | 0.62363243 |
| 1569500_at   |                        | Hs.638926 |                                             | -2.3752673 | -0.6240449  | 0.6240449  |
| 209014_at    | 9500 MAGED1            | Hs.5258   | melanoma antigen family D, 1                | -2.3763618 | -0.62437725 | 0.62437725 |
| 228579_at    |                        | Hs.587442 |                                             | -2.3785958 | -0.6250553  | 0.62505484 |
| 243008_at    |                        | Hs.671383 |                                             | -2.3786147 | -0.62506056 | 0.62506104 |
| 1558599_at   |                        | Hs.662681 |                                             | -2.3794396 | -0.6253109  | 0.6253109  |
| 210139_s_at  | 5376 PMP22             | Hs.372031 | peripheral myelin protein 22                | -2.380485  | -0.625628   | 0.6256275  |
| 233490_at    | 51164 DCTN4            | Hs.675564 | dynactin 4 (p62)                            | -2.3824172 | -0.6262131  | 0.6262131  |
| 202275_at    | 2539 G6PD              | Hs.461047 | glucose-6-phosphate dehydrogenase           | -2.382685  | -0.62629414 | 0.62629414 |
| 1556047_s_at | 57692 MAGEE1           | Hs.8453   | melanoma antigen family E, 1                | -2.3833578 | -0.62649775 | 0.62649775 |
| 242624_at    | 84448 ABLIM2           | Hs.233404 | actin binding LIM protein family, membe     | -2.3844624 | -0.626832   | 0.626832   |
| 223551_at    | 5570 PKIB              | Hs.724566 | protein kinase (cAMP-dependent, catalyti    | -2.3872287 | -0.6276684  | 0.6276684  |
| 219230_at    | 55273 TMEM100          | Hs.173233 | transmembrane protein 100                   | -2.3888767 | -0.6281662  | 0.6281662  |
| 1555978_s_at |                        | Hs.713646 |                                             | -2.389769  | -0.6284356  | 0.6284356  |
| 231579_s_at  | 7077 TIMP2             | Hs.633514 | TIMP metalloproteinase inhibitor 2          | -2.3907013 | -0.6287174  | 0.62871647 |
| 1559410_at   |                        | Hs.490920 |                                             | -2.3922536 | -0.6291852  | 0.6291852  |
| 230954_at    | 140688 C20orf112       | Hs.516978 | chromosome 20 open reading frame 112        | -2.3931127 | -0.6294441  | 0.6294441  |
| 210665_at    | 7035 TFPI              | Hs.516578 | tissue factor pathway inhibitor (lipoprotei | -2.3937714 | -0.62964296 | 0.6296425  |
| 202724_s_at  | 2308 FOXO1             | Hs.370666 | forkhead box O1                             | -2.3944767 | -0.62985516 | 0.62985516 |
| 1559957_a_at | 642852 LOC642852       | Hs.11637  | hypothetical LOC642852                      | -2.3949008 | -0.62998295 | 0.62998295 |
| 216278_at    |                        | Hs.655490 |                                             | -2.3952756 | -0.6300957  | 0.63009596 |
| 1555471_a_at | 56776 FMN2             | Hs.24889  | formin 2                                    | -2.3955154 | -0.6301682  | 0.63016796 |
| 200962_at    | 6160 RPL31             | Hs.469473 | ribosomal protein L31                       | -2.3960092 | -0.63031673 | 0.63031673 |
| 212040_at    | 10618 TGOLN2           | Hs.593382 | trans-golgi network protein 2               | -2.397466  | -0.63075495 | 0.6307554  |
| 200755_s_at  | 813 CALU               | Hs.724446 | calumenin                                   | -2.3977711 | -0.630847   | 0.630847   |
| 227351_at    | 730094 C16orf52        | Hs.498890 | chromosome 16 open reading frame 52         | -2.398181  | -0.6309705  | 0.63097    |
| 228909_at    | 642852 LOC642852       | Hs.11637  | hypothetical LOC642852                      | -2.401271  | -0.63189936 | 0.6318989  |
| 236656_s_at  | 100288911 LOC100288911 | Hs.432924 | hypothetical LOC100288911                   | -2.4015877 | -0.63199425 | 0.63199425 |
| 203810_at    | 11080 DNAJB4           | Hs.13852  | DnaJ (Hsp40) homolog, subfamily B, mer      | -2.4029152 | -0.6323929  | 0.6323929  |
| 211177_s_at  | 10587 TXNRD2           | Hs.443430 | thioredoxin reductase 2                     | -2.4034514 | -0.6325536  | 0.63255405 |
| 226886_at    | 2673 GFPT1             | Hs.580300 | glutamine--fructose-6-phosphate transami    | -2.4038718 | -0.63267994 | 0.63267994 |
| 239942_at    |                        | Hs.547771 |                                             | -2.4043734 | -0.6328304  | 0.6328306  |

|              |           |               |                  |                                             |            |             |            |
|--------------|-----------|---------------|------------------|---------------------------------------------|------------|-------------|------------|
| 243785_at    | 100272217 | LOC100272217  | Hs.601255        | hypothetical LOC100272217                   | -2.4122574 | -0.6351919  | 0.6351919  |
| 210718_s_at  | 100294341 | /// 51 ARL17A | /// LOC100294341 | ADP-ribosylation factor-like 17A            | -2.4128315 | -0.6353636  | 0.6353636  |
| 206623_at    | 5145      | PDE6A         | Hs.567314        | phosphodiesterase 6A, cGMP-specific, ro     | -2.4129272 | -0.6353922  | 0.6353922  |
| 204906_at    | 6196      | RPS6KA2       | Hs.655277        | ribosomal protein S6 kinase, 90kDa, poly    | -2.4138684 | -0.6356735  | 0.6356735  |
| 233986_s_at  | 64857     | PLEKHG2       | Hs.631574        | pleckstrin homology domain containing, f    | -2.4141612 | -0.63576126 | 0.6357608  |
| 214378_at    | 7035      | TFPI          | Hs.516578        | tissue factor pathway inhibitor (lipoprotei | -2.4156203 | -0.6361971  | 0.6361966  |
| 1555366_at   | 100131275 | NSAP11        | Hs.623961        | nervous system abundant protein 11          | -2.4156978 | -0.63622    | 0.63622    |
| 1568643_a_at |           |               | Hs.535775        |                                             | -2.4178033 | -0.63684845 | 0.63684845 |
| 205992_s_at  | 3600      | IL15          | Hs.654378        | interleukin 15                              | -2.4196389 | -0.63739586 | 0.63739586 |
| 228573_at    | 118429    | ANTXR2        | Hs.162963        | anthrax toxin receptor 2                    | -2.4204204 | -0.63762903 | 0.63762856 |
| 204341_at    | 10626     | TRIM16        | Hs.123534        | tripartite motif-containing 16              | -2.4204514 | -0.6376381  | 0.6376381  |
| 226931_at    | 83857     | TMTC1         | Hs.401954        | transmembrane and tetratricopeptide repe    | -2.4235222 | -0.63855267 | 0.63855267 |
| 217591_at    |           |               | Hs.721360        |                                             | -2.4237497 | -0.6386204  | 0.6386204  |
| 203408_s_at  | 6304      | SATB1         | Hs.517717        | SATB homeobox 1                             | -2.4248219 | -0.6389394  | 0.6389394  |
| 232279_at    | 23338     | PHF15         | Hs.483419        | PHD finger protein 15                       | -2.4276237 | -0.6397724  | 0.6397724  |
| 243629_x_at  | 100507057 | LOC100507057  |                  | hypothetical LOC100507057                   | -2.4286077 | -0.6400647  | 0.6400647  |
| 201719_s_at  | 2037      | EPB41L2       | Hs.486470        | erythrocyte membrane protein band 4.1-lil   | -2.4293253 | -0.64027786 | 0.64027786 |
| 1553122_s_at | 57786     | RBAK          | Hs.396178        | RB-associated KRAB zinc finger              | -2.4294634 | -0.6403189  | 0.6403189  |
| 213627_at    | 10916     | MAGED2        | Hs.522665        | melanoma antigen family D, 2                | -2.430469  | -0.6406174  | 0.6406174  |
| 238441_at    | 5563      | PRKAA2        | Hs.437039        | protein kinase, AMP-activated, alpha 2 ca   | -2.4321501 | -0.64111614 | 0.64111614 |
| 235308_at    | 26137     | ZBTB20        | Hs.655108        | zinc finger and BTB domain containing 2     | -2.4354868 | -0.6421051  | 0.6421051  |
| 229302_at    | 130733    | TMEM178       | Hs.40808         | transmembrane protein 178                   | -2.43855   | -0.64301205 | 0.64301157 |
| 217513_at    | 284021    | C17orf60      | Hs.631749        | chromosome 17 open reading frame 60         | -2.4416792 | -0.6439371  | 0.64393663 |
| 1559663_at   |           |               | Hs.676460        |                                             | -2.4441621 | -0.64467    | 0.64467    |
| 236155_at    | 79670     | ZCCHC6        | Hs.597057        | Zinc finger, CCHC domain containing 6       | -2.444836  | -0.64486885 | 0.64486885 |
| 228908_s_at  | 642852    | LOC642852     | Hs.11637         | hypothetical LOC642852                      | -2.4481733 | -0.64585304 | 0.64585257 |
| 227290_at    |           |               | Hs.60257         |                                             | -2.4496891 | -0.64629936 | 0.64629936 |
| 229103_at    | 7473      | WNT3          | Hs.445884        | wingless-type MMTV integration site fan     | -2.4501605 | -0.6464381  | 0.6464381  |
| 213222_at    | 23236     | PLCB1         | Hs.431173        | phospholipase C, beta 1 (phosphoinositide   | -2.451412  | -0.6468067  | 0.64680624 |
| 1567224_at   | 8091      | HMGA2         | Hs.505924        | high mobility group AT-hook 2               | -2.4517028 | -0.6468921  | 0.6468921  |
| 214954_at    | 26032     | SUSD5         | Hs.196647        | sushi domain containing 5                   | -2.453628  | -0.64745855 | 0.6474581  |
| 201242_s_at  | 481       | ATP1B1        | Hs.291196        | ATPase, Na+/K+ transporting, beta 1 poly    | -2.4544158 | -0.6476898  | 0.6476898  |
| 232176_at    | 84189     | SLITRK6       | Hs.525105        | SLIT and NTRK-like family, member 6         | -2.4582527 | -0.6488166  | 0.6488166  |
| 209693_at    | 23245     | ASTN2         | Hs.601562        | astrotactin 2                               | -2.4588296 | -0.64898586 | 0.64898586 |
| 205364_at    | 8309      | ACOX2         | Hs.444959        | acyl-CoA oxidase 2, branched chain          | -2.4616048 | -0.6497998  | 0.64979935 |
| 239503_at    |           |               | Hs.554052        |                                             | -2.4624047 | -0.65003395 | 0.65003395 |
| 226051_at    | 140606    | SELM          | Hs.55940         | selenoprotein M                             | -2.4652157 | -0.650857   | 0.650857   |
| 233364_s_at  |           |               | Hs.715755        |                                             | -2.4707038 | -0.65246105 | 0.65246105 |
| 209676_at    | 7035      | TFPI          | Hs.516578        | tissue factor pathway inhibitor (lipoprotei | -2.4742122 | -0.6534848  | 0.65348434 |
| 236439_at    |           |               | Hs.660734        |                                             | -2.4744828 | -0.6535635  | 0.6535635  |
| 231956_at    | 57674     | RNF213        | Hs.195642        | ring finger protein 213                     | -2.4746742 | -0.6536193  | 0.6536193  |
| 204774_at    | 2123      | EVI2A         | Hs.591198        | ecotropic viral integration site 2A         | -2.4754071 | -0.6538329  | 0.6538329  |
| 212607_at    | 10000     | AKT3          | Hs.498292        | v-akt murine thymoma viral oncogene hor     | -2.4774582 | -0.6544304  | 0.6544304  |

|              |                   |           |                                           |            |             |            |
|--------------|-------------------|-----------|-------------------------------------------|------------|-------------|------------|
| 226973_at    | 128434 VSTM2L     | Hs.517029 | V-set and transmembrane domain contain    | -2.4784067 | -0.6547065  | 0.6547065  |
| 202478_at    | 28951 TRIB2       | Hs.467751 | tribbles homolog 2 (Drosophila)           | -2.4784124 | -0.6547084  | 0.6547079  |
| 227992_s_at  | 147650 NCRNA00085 | Hs.467174 | non-protein coding RNA 85                 | -2.4815361 | -0.65561676 | 0.65561676 |
| 233413_at    |                   | Hs.210390 |                                           | -2.4823434 | -0.65585136 | 0.65585136 |
| 232182_at    | 286272 LOC286272  | Hs.648390 | hypothetical protein LOC286272            | -2.4836626 | -0.6562345  | 0.65623474 |
| 233540_s_at  | 55755 CDK5RAP2    | Hs.269560 | CDK5 regulatory subunit associated prote  | -2.4846747 | -0.6565285  | 0.6565285  |
| 200757_s_at  | 813 CALU          | Hs.724446 | calumenin                                 | -2.4856405 | -0.65680885 | 0.65680885 |
| 224209_s_at  | 9615 GDA          | Hs.494163 | guanine deaminase                         | -2.4877996 | -0.65743494 | 0.6574354  |
| 201426_s_at  | 7431 VIM          | Hs.455493 | vimentin                                  | -2.4892004 | -0.6578417  | 0.6578407  |
| 224480_s_at  | 84803 AGPAT9      | Hs.99196  | 1-acylglycerol-3-phosphate O-acyltransfe  | -2.492419  | -0.6587732  | 0.6587734  |
| 214643_x_at  | 274 BIN1          | Hs.193163 | bridging integrator 1                     | -2.4939241 | -0.6592088  | 0.6592088  |
| 227032_at    | 5362 PLXNA2       | Hs.497626 | plexin A2                                 | -2.4943643 | -0.6593361  | 0.6593361  |
| 210299_s_at  | 2273 FHL1         | Hs.435369 | four and a half LIM domains 1             | -2.4998808 | -0.6609297  | 0.6609297  |
| 242778_at    | 9404 LPXN         | Hs.125474 | leupaxin                                  | -2.5014777 | -0.6613903  | 0.6613903  |
| 236565_s_at  | 55323 LARP6       | Hs.416755 | La ribonucleoprotein domain family, men   | -2.502298  | -0.6616268  | 0.6616268  |
| 220169_at    | 80008 TMEM156     | Hs.374147 | transmembrane protein 156                 | -2.5026817 | -0.66173744 | 0.66173744 |
| 1565701_at   |                   | Hs.520751 |                                           | -2.5032823 | -0.66191053 | 0.66191053 |
| 202368_s_at  | 9697 TRAM2        | Hs.520182 | translocation associated membrane protei  | -2.5064127 | -0.66281223 | 0.66281176 |
| 222996_s_at  | 51523 CXXC5       | Hs.189119 | CXXC finger protein 5                     | -2.509998  | -0.66384315 | 0.66384315 |
| 235645_at    | 114799 ESCO1      | Hs.464733 | establishment of cohesion 1 homolog 1 (S  | -2.5112395 | -0.6641998  | 0.6641998  |
| 208682_s_at  | 10916 MAGED2      | Hs.522665 | melanoma antigen family D, 2              | -2.511359  | -0.66423416 | 0.66423416 |
| 235555_at    |                   | Hs.48729  |                                           | -2.5114007 | -0.6642461  | 0.6642461  |
| 241871_at    | 814 CAMK4         | Hs.591269 | calcium/calmodulin-dependent protein kir  | -2.5175335 | -0.6660054  | 0.6660056  |
| 241459_at    |                   | Hs.720426 |                                           | -2.517767  | -0.66607237 | 0.66607237 |
| 231890_at    |                   | Hs.273830 |                                           | -2.5216994 | -0.6671982  | 0.6671982  |
| 226252_at    |                   | Hs.202577 |                                           | -2.5220096 | -0.6672869  | 0.6672869  |
| 225227_at    |                   | Hs.536655 |                                           | -2.526251  | -0.668499   | 0.668499   |
| 235318_at    | 2200 FBN1         | Hs.591133 | fibrillin 1                               | -2.5268557 | -0.6686716  | 0.6686716  |
| 211981_at    | 1282 COL4A1       | Hs.17441  | collagen, type IV, alpha 1                | -2.5341203 | -0.6707425  | 0.6707425  |
| 234224_at    |                   | Hs.675501 |                                           | -2.5356386 | -0.6711745  | 0.6711745  |
| 1553995_a_at | 4907 NT5E         | Hs.153952 | 5'-nucleotidase, ecto (CD73)              | -2.5378091 | -0.67179155 | 0.67179203 |
| 219032_x_at  | 23596 OPN3        | Hs.724579 | opsin 3                                   | -2.5400186 | -0.67241955 | 0.67241955 |
| 242345_at    | 340267 COL28A1    | Hs.491104 | collagen, type XXVIII, alpha 1            | -2.54128   | -0.67277765 | 0.67277765 |
| 208964_s_at  | 3992 FADS1        | Hs.503546 | fatty acid desaturase 1                   | -2.5419133 | -0.6729574  | 0.6729574  |
| 224392_s_at  | 23596 OPN3        | Hs.724579 | opsin 3                                   | -2.5448117 | -0.6737795  | 0.6737795  |
| 1562955_at   |                   | Hs.683429 |                                           | -2.5477474 | -0.6746111  | 0.6746111  |
| 238121_at    | 256356 GK5        | Hs.135904 | glycerol kinase 5 (putative)              | -2.5489838 | -0.6749611  | 0.6749611  |
| 1555867_at   | 2786 GNG4         | Hs.159711 | guanine nucleotide binding protein (G prc | -2.5552697 | -0.6767378  | 0.6767378  |
| 1566482_at   |                   | Hs.684006 |                                           | -2.5582037 | -0.6775656  | 0.6775656  |
| 232881_at    | 149775 GNAS-AS    | Hs.122718 | GNAS antisense RNA (non-protein codin     | -2.5602043 | -0.6781297  | 0.6781292  |
| 229908_s_at  | 64718 UNKL        | Hs.643536 | unkempt homolog (Drosophila)-like         | -2.5651839 | -0.6795311  | 0.6795311  |
| 1555778_a_at | 10631 POSTN       | Hs.136348 | periostin, osteoblast specific factor     | -2.5690444 | -0.6806159  | 0.6806159  |
| 228393_s_at  | 55900 ZNF302      | Hs.436350 | zinc finger protein 302                   | -2.5693552 | -0.68070316 | 0.68070316 |

|             |                               |           |                                            |            |             |            |
|-------------|-------------------------------|-----------|--------------------------------------------|------------|-------------|------------|
| 202557_at   | 6782 HSPA13                   | Hs.352341 | heat shock protein 70kDa family, member    | -2.5698137 | -0.6808319  | 0.6808319  |
| 214087_s_at | 4604 MYBPC1                   | Hs.654589 | myosin binding protein C, slow type        | -2.5707245 | -0.6810875  | 0.6810875  |
| 218983_at   | 51279 C1RL                    | Hs.631730 | complement component 1, r subcomponer      | -2.571598  | -0.6813326  | 0.6813326  |
| 218718_at   | 56034 PDGFC                   | Hs.570855 | platelet derived growth factor C           | -2.572722  | -0.68164825 | 0.6816473  |
| 1556633_at  | 284677 C1orf204               |           | chromosome 1 open reading frame 204        | -2.5734415 | -0.6818495  | 0.6818495  |
| 239778_x_at |                               | Hs.690847 |                                            | -2.5736678 | -0.6819129  | 0.6819129  |
| 221207_s_at | 26960 NBEA                    | Hs.491172 | neurobeachin                               | -2.574002  | -0.68200636 | 0.68200684 |
| 225202_at   | 22836 RHOBTB3                 | Hs.445030 | Rho-related BTB domain containing 3        | -2.5743942 | -0.6821165  | 0.6821165  |
| 230934_at   | 100506057 /// 28 LOC100506057 | Hs.469002 | hypothetical LOC100506057 /// serine/thr   | -2.5805244 | -0.68383217 | 0.68383217 |
| 1570629_at  |                               | Hs.684411 |                                            | -2.582101  | -0.68427277 | 0.68427277 |
| 217540_at   | 91775 FAM55C                  | Hs.595933 | family with sequence similarity 55, memb   | -2.5831997 | -0.6845794  | 0.68457985 |
| 229549_at   |                               | Hs.592258 |                                            | -2.5875998 | -0.6858072  | 0.6858072  |
| 233112_at   |                               | Hs.675456 |                                            | -2.5901659 | -0.686522   | 0.6865225  |
| 201289_at   | 3491 CYR61                    | Hs.8867   | cysteine-rich, angiogenic inducer, 61      | -2.5940888 | -0.6876135  | 0.68761444 |
| 220148_at   | 64577 ALDH8A1                 | Hs.486520 | aldehyde dehydrogenase 8 family, membe     | -2.5947938 | -0.68780994 | 0.68780994 |
| 217388_s_at | 8942 KYNU                     | Hs.470126 | kynureninase (L-kynurenine hydrolase)      | -2.5949173 | -0.6878443  | 0.6878443  |
| 226358_at   | 83464 APH1B                   | Hs.511703 | anterior pharynx defective 1 homolog B (C  | -2.59974   | -0.6891837  | 0.6891837  |
| 224516_s_at | 51523 CXXC5                   | Hs.189119 | CXXC finger protein 5                      | -2.6029782 | -0.6900816  | 0.6900816  |
| 203845_at   | 8850 KAT2B                    | Hs.533055 | K(lysine) acetyltransferase 2B             | -2.6069765 | -0.6911888  | 0.6911888  |
| 224663_s_at | 1073 CFL2                     | Hs.180141 | cofilin 2 (muscle)                         | -2.6071627 | -0.6912403  | 0.6912403  |
| 221675_s_at | 56994 CHPT1                   | Hs.293077 | choline phosphotransferase 1               | -2.6097112 | -0.6919451  | 0.6919451  |
| 239001_at   | 4257 MGST1                    | Hs.389700 | Microsomal glutathione S-transferase 1     | -2.6127284 | -0.6927786  | 0.6927786  |
| 235844_at   | 10745 PHTF1                   | Hs.655824 | putative homeodomain transcription facto   | -2.6149201 | -0.6933837  | 0.6933832  |
| 216069_at   |                               | Hs.661229 |                                            | -2.614962  | -0.6933949  | 0.69339514 |
| 229086_at   | 148898 C1orf213               | Hs.61884  | chromosome 1 open reading frame 213        | -2.615858  | -0.69364214 | 0.69364214 |
| 201471_s_at | 8878 SQSTM1                   | Hs.437277 | sequestosome 1                             | -2.62006   | -0.6947994  | 0.6948004  |
| 201540_at   | 2273 FHL1                     | Hs.435369 | four and a half LIM domains 1              | -2.6208065 | -0.6950054  | 0.6950054  |
| 202976_s_at | 22836 RHOBTB3                 | Hs.445030 | Rho-related BTB domain containing 3        | -2.621569  | -0.6952152  | 0.6952152  |
| 232748_at   | 5069 PAPPA                    |           | pregnancy-associated plasma protein A, p   | -2.6218255 | -0.6952858  | 0.6952858  |
| 225098_at   | 10152 ABI2                    | Hs.471156 | abl-interactor 2                           | -2.6235244 | -0.6957531  | 0.6957531  |
| 218211_s_at | 79083 MLPH                    | Hs.102406 | melanophilin                               | -2.624482  | -0.6960163  | 0.6960163  |
| 201869_s_at | 6907 TBL1X                    | Hs.495656 | transducin (beta)-like 1X-linked           | -2.625084  | -0.6961818  | 0.6961818  |
| 213093_at   | 5578 PRKCA                    | Hs.531704 | protein kinase C, alpha                    | -2.6251934 | -0.6962118  | 0.6962118  |
| 223006_s_at | 23731 C9orf5                  | Hs.308074 | chromosome 9 open reading frame 5          | -2.6258943 | -0.69640446 | 0.69640446 |
| 212314_at   | 23231 SEL1L3                  | Hs.479384 | sel-1 suppressor of lin-12-like 3 (C. eleg | -2.6274154 | -0.69682217 | 0.69682217 |
| 223007_s_at | 23731 C9orf5                  | Hs.308074 | chromosome 9 open reading frame 5          | -2.6285446 | -0.6971321  | 0.6971321  |
| 244425_at   |                               |           |                                            | -2.6288626 | -0.6972194  | 0.6972194  |
| 241745_at   | 100507557 LOC100507557        |           | hypothetical LOC100507557                  | -2.6357915 | -0.69911814 | 0.69911814 |
| 1556250_at  |                               | Hs.656807 |                                            | -2.6376147 | -0.6996169  | 0.6996169  |
| 201467_s_at | 1728 NQO1                     | Hs.406515 | NAD(P)H dehydrogenase, quinone 1           | -2.6395001 | -0.70013237 | 0.70013237 |
| 212614_at   | 84159 ARID5B                  | Hs.535297 | AT rich interactive domain 5B (MRF1-lik    | -2.6400654 | -0.70028687 | 0.70028687 |
| 209894_at   | 3953 LEPR                     | Hs.723178 | leptin receptor                            | -2.6428976 | -0.7010603  | 0.7010603  |
| 213112_s_at | 8878 SQSTM1                   | Hs.437277 | sequestosome 1                             | -2.643338  | -0.70118046 | 0.70118046 |



|              |                 |           |                                              |            |             |            |
|--------------|-----------------|-----------|----------------------------------------------|------------|-------------|------------|
| 230585_at    |                 | Hs.129583 |                                              | -2.6434917 | -0.7012224  | 0.7012224  |
| 227758_at    | 85004 RERG      | Hs.199487 | RAS-like, estrogen-regulated, growth inhi    | -2.6434987 | -0.7012243  | 0.7012243  |
| 223569_at    | 84513 PPAPDC1B  | Hs.567619 | phosphatidic acid phosphatase type 2 dom     | -2.6437573 | -0.7012949  | 0.7012949  |
| 201666_at    | 7076 TIMP1      | Hs.522632 | TIMP metalloproteinase inhibitor 1           | -2.6447346 | -0.7015619  | 0.701561   |
| 241484_x_at  |                 |           |                                              | -2.6454008 | -0.7017431  | 0.7017431  |
| 213326_at    | 6843 VAMP1      | Hs.20021  | vesicle-associated membrane protein 1 (sy    | -2.6478438 | -0.70240927 | 0.7024088  |
| 214930_at    | 26050 SLITRK5   | Hs.591208 | SLIT and NTRK-like family, member 5          | -2.6481512 | -0.7024927  | 0.7024927  |
| 203085_s_at  | 7040 TGFB1      | Hs.645227 | transforming growth factor, beta 1           | -2.648812  | -0.7026725  | 0.70267296 |
| 238933_at    |                 |           |                                              | -2.6491132 | -0.702755   | 0.7027545  |
| 209305_s_at  | 4616 GADD45B    | Hs.110571 | growth arrest and DNA-damage-inducible       | -2.6506555 | -0.7031746  | 0.7031746  |
| 225946_at    | 11228 RASSF8    | Hs.696433 | Ras association (RalGDS/AF-6) domain f       | -2.6508412 | -0.70322514 | 0.70322514 |
| 223008_s_at  | 23731 C9orf5    | Hs.308074 | chromosome 9 open reading frame 5            | -2.6556926 | -0.70454407 | 0.70454407 |
| 206765_at    | 3759 KCNJ2      | Hs.1547   | potassium inwardly-rectifying channel, su    | -2.6570024 | -0.7048998  | 0.7048998  |
| 1557285_at   | 727738 AREGB    | Hs.645475 | Amphiregulin B                               | -2.6573362 | -0.7049904  | 0.7049904  |
| 232113_at    |                 | Hs.715755 |                                              | -2.6578913 | -0.70514107 | 0.70514107 |
| 216493_s_at  | 10643 IGF2BP3   | Hs.700696 | insulin-like growth factor 2 mRNA bindir     | -2.6582005 | -0.705225   | 0.705225   |
| 241936_x_at  |                 | Hs.117688 |                                              | -2.6590204 | -0.7054472  | 0.7054477  |
| 205627_at    | 978 CDA         | Hs.466910 | cytidine deaminase                           | -2.660573  | -0.7058687  | 0.70586824 |
| 243841_at    | 23224 SYNE2     | Hs.525392 | spectrin repeat containing, nuclear envelo   | -2.6606054 | -0.7058773  | 0.7058773  |
| 210102_at    | 4013 VWA5A      | Hs.152944 | von Willebrand factor A domain containir     | -2.666533  | -0.7074828  | 0.70748234 |
| 219569_s_at  | 80723 TMEM22    | Hs.477692 | transmembrane protein 22                     | -2.6672056 | -0.7076645  | 0.7076645  |
| 210202_s_at  | 274 BIN1        | Hs.193163 | bridging integrator 1                        | -2.6689878 | -0.7081466  | 0.7081461  |
| 1566622_at   |                 | Hs.684040 |                                              | -2.6690786 | -0.7081709  | 0.7081709  |
| 236699_at    |                 | Hs.724721 |                                              | -2.6695454 | -0.7082968  | 0.70829725 |
| 201848_s_at  | 664 BNIP3       | Hs.144873 | BCL2/adenovirus E1B 19kDa interacting        | -2.6731927 | -0.7092819  | 0.7092819  |
| 1555330_at   | 2729 GCLC       | Hs.654465 | glutamate-cysteine ligase, catalytic subun   | -2.6735082 | -0.7093668  | 0.7093673  |
| 239696_at    |                 | Hs.666516 |                                              | -2.6746225 | -0.7096677  | 0.7096677  |
| 234986_at    | 2730 GCLM       | Hs.315562 | glutamate-cysteine ligase, modifier subun    | -2.674713  | -0.709692   | 0.709692   |
| 213258_at    | 7035 TFPI       | Hs.516578 | tissue factor pathway inhibitor (lipoprotein | -2.676064  | -0.7100563  | 0.7100563  |
| 201124_at    | 3693 ITGB5      | Hs.536663 | integrin, beta 5                             | -2.6778786 | -0.71054506 | 0.71054554 |
| 1557289_s_at | 84163 GTF2IRD2  | Hs.647017 | GTF2I repeat domain containing 2             | -2.682299  | -0.7117348  | 0.71173525 |
| 224560_at    | 7077 TIMP2      | Hs.633514 | TIMP metalloproteinase inhibitor 2           | -2.687395  | -0.71310425 | 0.71310425 |
| 203811_s_at  | 11080 DNAJB4    | Hs.13852  | DnaJ (Hsp40) homolog, subfamily B, mer       | -2.6922183 | -0.7143979  | 0.71439743 |
| 227963_at    |                 | Hs.659940 |                                              | -2.6929047 | -0.7145817  | 0.7145815  |
| 242037_at    |                 |           |                                              | -2.6931136 | -0.7146373  | 0.71463776 |
| 206547_s_at  | 5475 PPEF1      | Hs.211589 | protein phosphatase, EF-hand calcium bin     | -2.694806  | -0.71509075 | 0.71509075 |
| 217904_s_at  | 23621 BACE1     | Hs.504003 | beta-site APP-cleaving enzyme 1              | -2.695877  | -0.71537733 | 0.71537733 |
| 244358_at    |                 |           |                                              | -2.6959116 | -0.71538687 | 0.7153864  |
| 243634_at    |                 |           |                                              | -2.7019036 | -0.7169881  | 0.7169881  |
| 1555855_at   |                 | Hs.677669 |                                              | -2.706249  | -0.7181473  | 0.7181473  |
| 231897_at    | 22949 PTGR1     | Hs.584864 | prostaglandin reductase 1                    | -2.7064493 | -0.7182007  | 0.7182007  |
| 203438_at    | 8614 STC2       | Hs.233160 | stanniocalcin 2                              | -2.7125032 | -0.7198124  | 0.7198124  |
| 222253_s_at  | 29774 POM121L9P | Hs.534980 | POM121 membrane glycoprotein-like 9, I       | -2.7127578 | -0.7198801  | 0.7198801  |

|              |                        |           |                                              |            |             |            |
|--------------|------------------------|-----------|----------------------------------------------|------------|-------------|------------|
| 231380_at    | 116328 C8orf34         | Hs.491941 | chromosome 8 open reading frame 34           | -2.712787  | -0.719888   | 0.71988773 |
| 202609_at    | 2059 EPS8              | Hs.591160 | epidermal growth factor receptor pathway     | -2.715431  | -0.7205906  | 0.7205906  |
| 236140_at    | 2730 GCLM              | Hs.315562 | glutamate-cysteine ligase, modifier subun    | -2.7160342 | -0.7207508  | 0.7207508  |
| 202619_s_at  | 5352 PLOD2             | Hs.477866 | procollagen-lysine, 2-oxoglutarate 5-dioxy   | -2.7163322 | -0.72082996 | 0.72082996 |
| 202017_at    | 2052 EPHX1             | Hs.89649  | epoxide hydrolase 1, microsomal (xenobio     | -2.71686   | -0.72097015 | 0.72097015 |
| 205623_at    | 218 ALDH3A1            | Hs.531682 | aldehyde dehydrogenase 3 family, membe       | -2.717108  | -0.72103596 | 0.72103596 |
| 224352_s_at  | 1073 CFL2              | Hs.180141 | cofilin 2 (muscle)                           | -2.7188869 | -0.721508   | 0.721508   |
| 201389_at    | 3678 ITGA5             | Hs.505654 | integrin, alpha 5 (fibronectin receptor, alp | -2.7220535 | -0.7223482  | 0.72234726 |
| 228824_s_at  | 22949 PTGR1            | Hs.584864 | prostaglandin reductase 1                    | -2.7250836 | -0.72315025 | 0.72315025 |
| 227082_at    |                        | Hs.193784 |                                              | -2.728678  | -0.72410107 | 0.72410107 |
| 212822_at    | 57493 HEG1             | Hs.477420 | HEG homolog 1 (zebrafish)                    | -2.7291813 | -0.7242341  | 0.7242341  |
| 241384_x_at  | 256356 GK5             | Hs.135904 | glycerol kinase 5 (putative)                 | -2.7302585 | -0.7245188  | 0.7245188  |
| 222784_at    | 64093 SMOC1            | Hs.497349 | SPARC related modular calcium binding        | -2.7311113 | -0.7247443  | 0.72474384 |
| 1562056_at   |                        |           |                                              | -2.7324297 | -0.7250924  | 0.72509193 |
| 204589_at    | 9891 NUAK1             | Hs.724500 | NUAK family, SNF1-like kinase, 1             | -2.7386727 | -0.72673845 | 0.72673845 |
| 235476_at    | 286827 TRIM59          | Hs.212957 | tripartite motif-containing 59               | -2.7395492 | -0.72696924 | 0.72696924 |
| 224279_s_at  | 26256 CABYR            | Hs.511983 | calcium binding tyrosine-(Y)-phosphoryla     | -2.7402492 | -0.7271538  | 0.7271533  |
| 242470_at    | 126272 EID2B           | Hs.135181 | EP300 interacting inhibitor of differentiat  | -2.7415273 | -0.72748995 | 0.72748995 |
| 240038_at    |                        | Hs.608694 |                                              | -2.7418528 | -0.7275758  | 0.7275753  |
| 235976_at    | 84189 SLITRK6          | Hs.525105 | SLIT and NTRK-like family, member 6          | -2.7424881 | -0.7277427  | 0.7277427  |
| 232405_at    |                        | Hs.662234 |                                              | -2.7435324 | -0.72801733 | 0.72801733 |
| 225387_at    | 10098 TSPAN5           | Hs.118118 | tetraspanin 5                                | -2.745265  | -0.7284727  | 0.7284727  |
| 207415_at    | 22925 PLA2R1           | Hs.410477 | phospholipase A2 receptor 1, 180kDa          | -2.75752   | -0.73168564 | 0.73168564 |
| 244414_at    |                        |           |                                              | -2.7575855 | -0.7317028  | 0.7317028  |
| 201627_s_at  | 3638 INSIG1            | Hs.520819 | insulin induced gene 1                       | -2.7582564 | -0.7318783  | 0.7318783  |
| 212816_s_at  | 875 CBS                | Hs.533013 | cystathionine-beta-synthase                  | -2.7583475 | -0.7319021  | 0.7319021  |
| 203343_at    | 7358 UGDH              | Hs.572518 | UDP-glucose 6-dehydrogenase                  | -2.7597847 | -0.73227787 | 0.73227787 |
| 234222_at    |                        | Hs.677309 |                                              | -2.7598975 | -0.7323072  | 0.73230743 |
| 227443_at    | 286343 C9orf150        | Hs.445356 | chromosome 9 open reading frame 150          | -2.759928  | -0.73231554 | 0.73231506 |
| 241376_at    | 100130097 LOC100130097 | Hs.298987 | Hypothetical LOC100130097                    | -2.7607198 | -0.732522   | 0.7325225  |
| 222450_at    | 56937 PMEPA1           | Hs.517155 | prostate transmembrane protein, androgen     | -2.7691338 | -0.73471737 | 0.73471737 |
| 220936_s_at  | 55766 H2AFJ            | Hs.724631 | H2A histone family, member J                 | -2.7704237 | -0.73505354 | 0.73505306 |
| 236338_at    |                        |           |                                              | -2.7801018 | -0.73756886 | 0.73756886 |
| 207442_at    | 1440 CSF3              | Hs.2233   | colony stimulating factor 3 (granulocyte)    | -2.7843099 | -0.73865986 | 0.73865986 |
| 209466_x_at  | 5764 PTN               | Hs.371249 | pleiotrophin                                 | -2.7852228 | -0.73889637 | 0.73889637 |
| 223915_at    | 54880 BCOR             | Hs.659681 | BCL6 corepressor                             | -2.786709  | -0.7392812  | 0.7392812  |
| 239280_at    |                        | Hs.145520 |                                              | -2.7914112 | -0.7404976  | 0.7404971  |
| 207808_s_at  | 5627 PROS1             | Hs.64016  | protein S (alpha)                            | -2.7916079 | -0.74054813 | 0.74054813 |
| 233723_at    |                        | Hs.663298 |                                              | -2.7953527 | -0.74151516 | 0.74151516 |
| 214577_at    | 4131 MAP1B             | Hs.335079 | microtubule-associated protein 1B            | -2.8048944 | -0.74397326 | 0.74397326 |
| 1569577_x_at |                        | Hs.364739 |                                              | -2.8089988 | -0.745028   | 0.745028   |
| 225575_at    | 3977 LIFR              | Hs.133421 | leukemia inhibitory factor receptor alpha    | -2.810966  | -0.745533   | 0.745533   |
| 1558404_at   | 644242 LOC644242       | Hs.515383 | hypothetical LOC644242                       | -2.814076  | -0.7463305  | 0.74633074 |

|              |                  |           |                                           |            |             |            |
|--------------|------------------|-----------|-------------------------------------------|------------|-------------|------------|
| 233607_at    |                  | Hs.677063 |                                           | -2.8147898 | -0.74651384 | 0.74651337 |
| 211004_s_at  | 221 ALDH3B1      | Hs.523841 | aldehyde dehydrogenase 3 family, membe    | -2.8153882 | -0.7466669  | 0.7466669  |
| 201141_at    | 10457 GPNMB      | Hs.190495 | glycoprotein (transmembrane) nmb          | -2.8183832 | -0.74743366 | 0.74743414 |
| 236769_at    | 158402 LOC158402 | Hs.494822 | hypothetical protein LOC158402            | -2.8202395 | -0.7479086  | 0.74790907 |
| 1561181_at   |                  | Hs.660277 |                                           | -2.82764   | -0.74979925 | 0.74979925 |
| 232459_at    |                  | Hs.660657 |                                           | -2.8307726 | -0.75059795 | 0.75059795 |
| 202723_s_at  | 2308 FOXO1       | Hs.370666 | forkhead box O1                           | -2.8310084 | -0.75065804 | 0.75065804 |
| 1559360_at   |                  | Hs.665919 |                                           | -2.8316336 | -0.7508173  | 0.7508173  |
| 201843_s_at  | 2202 EFEMP1      | Hs.76224  | EGF-containing fibulin-like extracellular | -2.831787  | -0.7508564  | 0.7508564  |
| 207469_s_at  | 8544 PIR         | Hs.495728 | pirin (iron-binding nuclear protein)      | -2.8340268 | -0.7514267  | 0.7514267  |
| 1555326_a_at | 8754 ADAM9       | Hs.591852 | ADAM metallopeptidase domain 9            | -2.8364859 | -0.7520523  | 0.7520523  |
| 204099_at    | 6604 SMARCD3     | Hs.647067 | SWI/SNF related, matrix associated, actin | -2.8381183 | -0.75246716 | 0.75246763 |
| 204072_s_at  | 10129 FRY        | Hs.507669 | furry homolog (Drosophila)                | -2.8395624 | -0.7528343  | 0.7528343  |
| 205582_s_at  | 2687 GGT5        | Hs.437156 | gamma-glutamyltransferase 5               | -2.8431199 | -0.75373745 | 0.75373745 |
| 244804_at    | 8878 SQSTM1      | Hs.437277 | sequestosome 1                            | -2.8487184 | -0.7551565  | 0.7551565  |
| 233496_s_at  | 1073 CFL2        | Hs.180141 | cofilin 2 (muscle)                        | -2.8546376 | -0.7566538  | 0.7566538  |
| 230682_x_at  | 8714 ABCC3       | Hs.463421 | ATP-binding cassette, sub-family C (CFT   | -2.855064  | -0.75676155 | 0.75676155 |
| 1556696_s_at | 441094 FLJ42709  | Hs.457407 | hypothetical LOC441094                    | -2.857277  | -0.7573204  | 0.7573204  |
| 239921_at    | 340267 COL28A1   | Hs.491104 | collagen, type XXVIII, alpha 1            | -2.8632705 | -0.758832   | 0.758832   |
| 1554140_at   | 79819 WDR78      | Hs.49421  | WD repeat domain 78                       | -2.8632715 | -0.7588322  | 0.7588322  |
| 233126_s_at  | 55301 OLAH       | Hs.24309  | oleoyl-ACP hydrolase                      | -2.8632855 | -0.7588358  | 0.7588358  |
| 1553708_at   | 84847 MGC16075   | Hs.488236 | hypothetical protein MGC16075             | -2.8651903 | -0.7593155  | 0.7593155  |
| 201313_at    | 2026 ENO2        | Hs.511915 | enolase 2 (gamma, neuronal)               | -2.8675048 | -0.7598977  | 0.7598982  |
| 238497_at    | 219902 TMEM136   | Hs.643516 | transmembrane protein 136                 | -2.8676233 | -0.75992775 | 0.75992775 |
| 233955_x_at  | 51523 CXXC5      | Hs.189119 | CXXC finger protein 5                     | -2.8678963 | -0.7599964  | 0.7599964  |
| 225571_at    | 3977 LIFR        | Hs.133421 | leukemia inhibitory factor receptor alpha | -2.868723  | -0.7602043  | 0.7602043  |
| 235251_at    |                  | Hs.444290 |                                           | -2.8697927 | -0.76047325 | 0.76047325 |
| 231116_at    |                  | Hs.632463 |                                           | -2.8711483 | -0.7608137  | 0.7608142  |
| 222162_s_at  | 9510 ADAMTS1     | Hs.643357 | ADAM metallopeptidase with thrombospi     | -2.872858  | -0.76124334 | 0.76124334 |
| 221565_s_at  | 51063 CALHM2     | Hs.241545 | calcium homeostasis modulator 2           | -2.8777065 | -0.76245975 | 0.76245975 |
| 212758_s_at  | 6935 ZEB1        | Hs.124503 | zinc finger E-box binding homeobox 1      | -2.8783648 | -0.76262474 | 0.76262474 |
| 204867_at    | 2644 GCHFR       | Hs.631717 | GTP cyclohydrolase I feedback regulator   | -2.8810146 | -0.7632885  | 0.7632885  |
| 202363_at    | 6695 SPOCK1      | Hs.596136 | sparc/osteonectin, cwcv and kazal-like do | -2.8817623 | -0.7634759  | 0.7634754  |
| 222156_x_at  | 9236 CCPG1       | Hs.285051 | cell cycle progression 1                  | -2.8903463 | -0.7656212  | 0.7656212  |
| 239901_at    |                  | Hs.677739 |                                           | -2.8909836 | -0.76578045 | 0.76578    |
| 214453_s_at  | 10561 IFI44      | Hs.82316  | interferon-induced protein 44             | -2.8923752 | -0.7661271  | 0.7661276  |
| 241824_at    |                  | Hs.676352 |                                           | -2.9001653 | -0.76806784 | 0.76806736 |
| 218656_s_at  | 10186 LHFP       | Hs.507798 | lipoma HMGIC fusion partner               | -2.9048269 | -0.7692261  | 0.7692261  |
| 239153_at    | 100124700 HOTAIR | Hs.197076 | hox transcript antisense RNA (non-protein | -2.9064124 | -0.76961946 | 0.76961994 |
| 241970_at    |                  | Hs.682753 |                                           | -2.907208  | -0.76981735 | 0.7698169  |
| 1554485_s_at | 140738 TMEM37    | Hs.26216  | transmembrane protein 37                  | -2.9101315 | -0.77054214 | 0.77054214 |
| 201825_s_at  | 51097 SCCPDH     | Hs.498397 | saccharopine dehydrogenase (putative)     | -2.9265018 | -0.7745886  | 0.7745886  |
| 226697_at    | 92689 FAM114A1   | Hs.476517 | family with sequence similarity 114, mem  | -2.928197  | -0.7750063  | 0.7750063  |

|              |                  |                    |                                              |            |             |            |
|--------------|------------------|--------------------|----------------------------------------------|------------|-------------|------------|
| 1558706_a_at | 84913 ATOH8      | Hs.135569          | Atonal homolog 8 (Drosophila)                | -2.9313674 | -0.7757869  | 0.7757869  |
| 202375_at    | 9871 SEC24D      | Hs.189641          | SEC24 family, member D (S. cerevisiae)       | -2.9359536 | -0.7769146  | 0.7769146  |
| 203675_at    | 4925 NUCB2       | Hs.654599          | nucleobindin 2                               | -2.943408  | -0.77874374 | 0.77874374 |
| 222167_at    |                  | Hs.665725          |                                              | -2.9455178 | -0.77926064 | 0.77926064 |
| 227121_at    |                  | Hs.193784          |                                              | -2.9456785 | -0.7793002  | 0.77929974 |
| 211071_s_at  | 10962 MLLT11     | Hs.75823           | myeloid/lymphoid or mixed-lineage leuke      | -2.9481456 | -0.77990437 | 0.7799034  |
| 203505_at    | 19 ABCA1         | Hs.429294          | ATP-binding cassette, sub-family A (ABC      | -2.950426  | -0.78046155 | 0.7804618  |
| 203729_at    | 2014 EMP3        | Hs.9999            | epithelial membrane protein 3                | -2.9509766 | -0.7805958  | 0.78059673 |
| 219383_at    | 79899 PRR5L      | Hs.19987           | proline rich 5 like                          | -2.9547    | -0.78150606 | 0.7815056  |
| 215092_s_at  | 10725 NFAT5      | Hs.371987          | nuclear factor of activated T-cells 5, tonic | -2.955164  | -0.7816191  | 0.7816191  |
| 239923_at    |                  | Hs.666935          |                                              | -2.957719  | -0.7822423  | 0.7822428  |
| 242162_at    | 164781 WDR69     | Hs.424594          | WD repeat domain 69                          | -2.9598246 | -0.78275585 | 0.78275585 |
| 244026_at    |                  | Hs.604381          |                                              | -2.9624896 | -0.7834053  | 0.7834048  |
| 236277_at    |                  | Hs.655757          |                                              | -2.9644663 | -0.78388643 | 0.78388596 |
| 219737_s_at  | 5101 PCDH9       | Hs.654709          | protocadherin 9                              | -2.964779  | -0.78396225 | 0.78396225 |
| 201720_s_at  | 7805 LAPTM5      | Hs.371021          | lysosomal protein transmembrane 5            | -2.9651318 | -0.7840481  | 0.7840481  |
| 226542_at    |                  | Hs.547576          |                                              | -2.9725971 | -0.78586197 | 0.78586197 |
| 223502_s_at  | 10673 TNFSF13B   | Hs.525157          | tumor necrosis factor (ligand) superfamily   | -2.9735641 | -0.7860966  | 0.7860966  |
| 209921_at    | 23657 SLC7A11    | Hs.390594          | solute carrier family 7, (cationic amino ac  | -2.9761717 | -0.78672886 | 0.78672886 |
| 224733_at    | 123920 CMTM3     | Hs.298198          | CKLF-like MARVEL transmembrane dor           | -2.987701  | -0.7895179  | 0.7895179  |
| 210896_s_at  | 444 ASPH         | Hs.332422          | aspartate beta-hydroxylase                   | -2.9956033 | -0.79142284 | 0.7914238  |
| 222073_at    | 1285 COL4A3      | Hs.570065          | collagen, type IV, alpha 3 (Goodpasture a    | -2.999398  | -0.79233646 | 0.79233646 |
| 224772_at    | 89796 NAV1       | Hs.585374          | neuron navigator 1                           | -2.999505  | -0.7923622  | 0.7923622  |
| 210664_s_at  | 7035 TFPI        | Hs.516578          | tissue factor pathway inhibitor (lipoprotei  | -3.0007186 | -0.79265404 | 0.79265404 |
| 211919_s_at  | 7852 CXCR4       | Hs.593413          | chemokine (C-X-C motif) receptor 4           | -3.0042436 | -0.7935009  | 0.7935009  |
| 225368_at    | 28996 HIPK2      | Hs.724392          | homeodomain interacting protein kinase 2     | -3.0051334 | -0.7937145  | 0.7937145  |
| 239556_at    | 645513 LOC645513 | Hs.709491          | Hypothetical LOC645513                       | -3.0067708 | -0.79410744 | 0.79410744 |
| 229088_at    | 5167 ENPP1       | Hs.527295          | ectonucleotide pyrophosphatase/phosphoc      | -3.0079706 | -0.79439497 | 0.79439545 |
| 201718_s_at  | 2037 EPB41L2     | Hs.486470          | erythrocyte membrane protein band 4.1-lil    | -3.0100121 | -0.7948847  | 0.7948847  |
| 235421_at    | 1326 MAP3K8      | Hs.432453//Hs.6630 | Mitogen-activated protein kinase kinase k    | -3.0160153 | -0.79632187 | 0.79632187 |
| 201482_at    | 5768 QSOX1       | Hs.518374          | quiescin Q6 sulfhydryl oxidase 1             | -3.0177941 | -0.7967472  | 0.7967472  |
| 231406_at    | 80228 ORAI2      | Hs.363308          | ORAI calcium release-activated calcium i     | -3.0295057 | -0.799541   | 0.7995415  |
| 215447_at    |                  |                    |                                              | -3.0308628 | -0.7998643  | 0.7998643  |
| 226250_at    |                  | Hs.202577          |                                              | -3.0361707 | -0.8011265  | 0.8011265  |
| 205880_at    | 5587 PRKD1       | Hs.508999          | protein kinase D1                            | -3.0366135 | -0.80123186 | 0.8012314  |
| 229040_at    |                  | Hs.661035          |                                              | -3.0429099 | -0.8027258  | 0.8027258  |
| 202459_s_at  | 9663 LPIN2       | Hs.132342          | lipin 2                                      | -3.0430546 | -0.8027601  | 0.8027601  |
| 222783_s_at  | 64093 SMOC1      | Hs.497349          | SPARC related modular calcium binding        | -3.044435  | -0.80308723 | 0.80308723 |
| 204385_at    | 8942 KYNU        | Hs.470126          | kynureninase (L-kynurenine hydrolase)        | -3.047171  | -0.80373573 | 0.8037348  |
| 236067_at    |                  | Hs.662697          |                                              | -3.0479023 | -0.80390835 | 0.80390835 |
| 228742_at    |                  | Hs.133261          |                                              | -3.048793  | -0.8041191  | 0.8041191  |
| 208963_x_at  | 3992 FADS1       | Hs.503546          | fatty acid desaturase 1                      | -3.0515554 | -0.8047724  | 0.8047724  |
| 214719_at    | 283537 SLC46A3   | Hs.117167          | solute carrier family 46, member 3           | -3.0608122 | -0.80695724 | 0.80695724 |

|             |                  |           |                                                |            |             |            |
|-------------|------------------|-----------|------------------------------------------------|------------|-------------|------------|
| 237411_at   | 11174 ADAMTS6    | Hs.482291 | ADAM metallopeptidase with thrombosporin       | -3.062665  | -0.80739355 | 0.807394   |
| 203474_at   | 10788 IQGAP2     | Hs.291030 | IQ motif containing GTPase activating protein  | -3.0630364 | -0.8074813  | 0.8074813  |
| 214110_s_at |                  | Hs.469287 |                                                | -3.0637028 | -0.80763817 | 0.80763817 |
| 209616_s_at | 1066 CES1        | Hs.558865 | carboxylesterase 1                             | -3.0684211 | -0.80874825 | 0.80874825 |
| 1560318_at  | 9411 ARHGAP29    | Hs.483238 | Rho GTPase activating protein 29               | -3.0686178 | -0.8087945  | 0.8087945  |
| 202796_at   | 11346 SYNPO      | Hs.723138 | synaptopodin                                   | -3.0708814 | -0.8093262  | 0.80932665 |
| 231292_at   | 493861 EID3      | Hs.659857 | EP300 interacting inhibitor of differentiation | -3.0711246 | -0.80938363 | 0.8093834  |
| 229201_at   |                  | Hs.593599 |                                                | -3.0722134 | -0.809639   | 0.80963945 |
| 202369_s_at | 9697 TRAM2       | Hs.520182 | translocation associated membrane protein      | -3.074175  | -0.8100996  | 0.8100996  |
| 214439_x_at | 274 BIN1         | Hs.193163 | bridging integrator 1                          | -3.0782132 | -0.8110466  | 0.8110466  |
| 213187_x_at | 2512 FTL         | Hs.433670 | ferritin, light polypeptide                    | -3.07837   | -0.8110838  | 0.81108284 |
| 239043_at   | 342908 ZNF404    | Hs.76561  | zinc finger protein 404                        | -3.0805507 | -0.81159425 | 0.811594   |
| 221107_at   | 55584 CHRNA9     | Hs.272278 | cholinergic receptor, nicotinic, alpha 9       | -3.0826585 | -0.81208754 | 0.81208754 |
| 239343_at   | 728705 LOC728705 | Hs.129828 | hypothetical protein LOC728705                 | -3.0833738 | -0.8122549  | 0.8122549  |
| 209651_at   | 7041 TGFB1I1     | Hs.513530 | transforming growth factor beta 1 induced      | -3.0883102 | -0.81340885 | 0.81340885 |
| 243813_at   |                  | Hs.583755 |                                                | -3.092674  | -0.8144274  | 0.8144274  |
| 238429_at   | 137835 TMEM71    | Hs.293842 | transmembrane protein 71                       | -3.0930235 | -0.8145089  | 0.8145089  |
| 212327_at   | 22998 LIMCH1     | Hs.335163 | LIM and calponin homology domains 1            | -3.0952797 | -0.81503487 | 0.81503487 |
| 203910_at   | 9411 ARHGAP29    | Hs.483238 | Rho GTPase activating protein 29               | -3.0994031 | -0.8159952  | 0.8159952  |
| 224990_at   | 201895 C4orf34   | Hs.576320 | chromosome 4 open reading frame 34             | -3.1010222 | -0.8163719  | 0.8163719  |
| 229441_at   | 11098 PRSS23     | Hs.25338  | Protease, serine, 23                           | -3.1038768 | -0.8170357  | 0.8170357  |
| 205534_at   | 5099 PCDH7       | Hs.479439 | protocadherin 7                                | -3.1092603 | -0.81828547 | 0.81828594 |
| 202975_s_at | 22836 RHOBTB3    | Hs.445030 | Rho-related BTB domain containing 3            | -3.113133  | -0.8191838  | 0.81918335 |
| 241363_at   | 54932 EXD3       | Hs.495553 | exonuclease 3'-5' domain containing 3          | -3.1136239 | -0.8192973  | 0.8192973  |
| 202931_x_at | 274 BIN1         | Hs.193163 | bridging integrator 1                          | -3.122306  | -0.82130575 | 0.8213062  |
| 202665_s_at | 7456 WIPF1       | Hs.128067 | WAS/WASL interacting protein family, member 1  | -3.1241229 | -0.82172537 | 0.82172585 |
| 235629_at   |                  | Hs.658355 |                                                | -3.1287796 | -0.8227999  | 0.82280016 |
| 211677_x_at | 57863 CADM3      | Hs.365689 | cell adhesion molecule 3                       | -3.1377578 | -0.8248668  | 0.82486725 |
| 205464_at   | 6338 SCNN1B      | Hs.414614 | sodium channel, nonvoltage-gated 1, beta       | -3.139427  | -0.8252506  | 0.8252506  |
| 232268_at   |                  | Hs.656897 |                                                | -3.1416602 | -0.82576346 | 0.8257637  |
| 211571_s_at | 1462 VCAN        | Hs.643801 | versican                                       | -3.1510887 | -0.8279252  | 0.8279252  |
| 243606_at   | 91775 FAM55C     | Hs.595933 | family with sequence similarity 55, member 1   | -3.156457  | -0.82915306 | 0.82915306 |
| 205372_at   | 5324 PLAG1       | Hs.14968  | pleiomorphic adenoma gene 1                    | -3.1608088 | -0.830147   | 0.8301468  |
| 226103_at   | 91624 NEXN       | Hs.612385 | nexilin (F actin binding protein)              | -3.164146  | -0.8309083  | 0.8309078  |
| 237313_at   |                  | Hs.666723 |                                                | -3.1666474 | -0.8314781  | 0.8314781  |
| 229072_at   |                  | Hs.594773 |                                                | -3.1786456 | -0.8342061  | 0.8342061  |
| 230180_at   |                  |           |                                                | -3.1801903 | -0.8345566  | 0.8345566  |
| 201280_s_at | 1601 DAB2        | Hs.481980 | disabled homolog 2, mitogen-responsive protein | -3.181635  | -0.83488417 | 0.83488417 |
| 228964_at   | 639 PRDM1        | Hs.436023 | PR domain containing 1, with ZNF domain        | -3.182873  | -0.83516455 | 0.835165   |
| 208962_s_at | 3992 FADS1       | Hs.503546 | fatty acid desaturase 1                        | -3.1830087 | -0.83519554 | 0.83519554 |
| 230744_at   | 11167 FSTL1      | Hs.269512 | follistatin-like 1                             | -3.1955926 | -0.8380418  | 0.8380418  |
| 231929_at   | 22807 IKZF2      | Hs.604950 | IKAROS family zinc finger 2 (Helios)           | -3.2020485 | -0.83949757 | 0.83949757 |
| 226333_at   | 3570 IL6R        | Hs.709210 | interleukin 6 receptor                         | -3.2031155 | -0.8397379  | 0.8397379  |

|              |           |              |           |                                           |            |             |            |
|--------------|-----------|--------------|-----------|-------------------------------------------|------------|-------------|------------|
| 240771_at    | 257044    | C1orf101     | Hs.459534 | chromosome 1 open reading frame 101       | -3.2046566 | -0.8400848  | 0.840085   |
| 58780_s_at   | 55701     | ARHGEF40     | Hs.35125  | Rho guanine nucleotide exchange factor (  | -3.2180438 | -0.84309196 | 0.84309196 |
| 205141_at    | 283       | ANG          | Hs.283749 | angiogenin, ribonuclease, RNase A family  | -3.2182617 | -0.8431411  | 0.8431406  |
| 210201_x_at  | 274       | BIN1         | Hs.193163 | bridging integrator 1                     | -3.226419  | -0.8449669  | 0.8449669  |
| 244745_at    | 85004     | REG          | Hs.199487 | RAS-like, estrogen-regulated, growth inhi | -3.238162  | -0.8475876  | 0.8475876  |
| 213069_at    | 57493     | HEG1         | Hs.477420 | HEG homolog 1 (zebrafish)                 | -3.242086  | -0.84846115 | 0.84846115 |
| 213455_at    | 92689     | FAM114A1     | Hs.476517 | family with sequence similarity 114, mem  | -3.2426174 | -0.8485794  | 0.8485794  |
| 213241_at    | 10154     | PLXNC1       | Hs.584845 | plexin C1                                 | -3.2435231 | -0.8487811  | 0.84878063 |
| 205640_at    | 221       | ALDH3B1      | Hs.523841 | aldehyde dehydrogenase 3 family, membe    | -3.245933  | -0.8493166  | 0.8493166  |
| 212325_at    | 22998     | LIMCH1       | Hs.335163 | LIM and calponin homology domains 1       | -3.2459898 | -0.8493295  | 0.849329   |
| 204620_s_at  | 1462      | VCAN         | Hs.643801 | versican                                  | -3.251061  | -0.8504553  | 0.8504553  |
| 210757_x_at  | 1601      | DAB2         | Hs.481980 | disabled homolog 2, mitogen-responsive p  | -3.2514951 | -0.8505516  | 0.8505516  |
| 44702_at     | 85360     | SYDE1        | Hs.528701 | synapse defective 1, Rho GTPase, homolo   | -3.2544453 | -0.8512058  | 0.8512058  |
| 224016_at    | 28996     | HIPK2        | Hs.724392 | homeodomain interacting protein kinase 2  | -3.259257  | -0.85227156 | 0.85227156 |
| 210220_at    | 2535      | FZD2         | Hs.142912 | frizzled homolog 2 (Drosophila)           | -3.2704082 | -0.8547354  | 0.8547354  |
| 225097_at    | 28996     | HIPK2        | Hs.724392 | homeodomain interacting protein kinase 2  | -3.27674   | -0.8561306  | 0.8561306  |
| 228390_at    |           |              | Hs.594773 |                                           | -3.2790487 | -0.85663843 | 0.8566389  |
| 227584_at    | 89796     | NAV1         | Hs.585374 | neuron navigator 1                        | -3.2841346 | -0.8577566  | 0.8577566  |
| 206662_at    | 2745      | GLRX         | Hs.28988  | glutaredoxin (thioltransferase)           | -3.285507  | -0.858058   | 0.858058   |
| 1560011_at   |           |              |           |                                           | -3.2889445 | -0.85881233 | 0.85881233 |
| 219093_at    | 55022     | PID1         | Hs.724663 | phosphotyrosine interaction domain conta  | -3.2904232 | -0.8591366  | 0.8591366  |
| 1558378_a_at | 113146    | AHNAK2       | Hs.441783 | AHNAK nucleoprotein 2                     | -3.2915328 | -0.85937977 | 0.85937977 |
| 227647_at    | 10008     | KCNE3        | Hs.523899 | potassium voltage-gated channel, Isk-rela | -3.2916741 | -0.85941076 | 0.85941076 |
| 1556997_a_at | 3953      | LEPR         | Hs.723178 | leptin receptor                           | -3.291711  | -0.85941887 | 0.85941887 |
| 219557_s_at  | 56675     | NRIP3        | Hs.523467 | nuclear receptor interacting protein 3    | -3.3021297 | -0.86169815 | 0.8616986  |
| 211964_at    | 1284      | COL4A2       | Hs.508716 | collagen, type IV, alpha 2                | -3.3067245 | -0.8627014  | 0.8627014  |
| 201397_at    | 26227     | PHGDH        | Hs.487296 | phosphoglycerate dehydrogenase            | -3.3139458 | -0.864275   | 0.864275   |
| 215641_at    | 9871      | SEC24D       | Hs.189641 | SEC24 family, member D (S. cerevisiae)    | -3.3345804 | -0.8687527  | 0.8687525  |
| 225116_at    | 28996     | HIPK2        | Hs.724392 | homeodomain interacting protein kinase 2  | -3.3422682 | -0.8704138  | 0.8704138  |
| 204421_s_at  | 2247      | FGF2         | Hs.284244 | fibroblast growth factor 2 (basic)        | -3.3474014 | -0.8715205  | 0.871521   |
| 209866_s_at  | 23284     | LPHN3        | Hs.570770 | latrophilin 3                             | -3.349472  | -0.87196684 | 0.87196684 |
| 228919_at    |           |              |           |                                           | -3.3528712 | -0.8726983  | 0.8726988  |
| 220935_s_at  | 55755     | CDK5RAP2     | Hs.269560 | CDK5 regulatory subunit associated prote  | -3.3550851 | -0.87317467 | 0.87317467 |
| 243707_at    |           |              | Hs.145520 |                                           | -3.3633323 | -0.87494564 | 0.87494564 |
| 226546_at    | 100506844 | LOC100506844 |           | hypothetical LOC100506844                 | -3.365841  | -0.8754835  | 0.8754835  |
| 227503_at    |           |              | Hs.656767 |                                           | -3.3664374 | -0.8756113  | 0.8756113  |
| 212328_at    | 22998     | LIMCH1       | Hs.335163 | LIM and calponin homology domains 1       | -3.3846943 | -0.8795128  | 0.8795128  |
| 219028_at    | 28996     | HIPK2        | Hs.724392 | homeodomain interacting protein kinase 2  | -3.387488  | -0.8801079  | 0.8801079  |
| 1567575_at   |           |              | Hs.684651 |                                           | -3.394602  | -0.8816211  | 0.88162136 |
| 211980_at    | 1282      | COL4A1       | Hs.17441  | collagen, type IV, alpha 1                | -3.3970404 | -0.8821392  | 0.8821392  |
| 228275_at    |           |              | Hs.551751 |                                           | -3.415257  | -0.8859973  | 0.8859968  |
| 227052_at    |           |              | Hs.720403 |                                           | -3.4271197 | -0.8884983  | 0.8884983  |
| 204619_s_at  | 1462      | VCAN         | Hs.643801 | versican                                  | -3.4310095 | -0.88931656 | 0.88931656 |

|              |                        |           |                                                                       |            |             |            |
|--------------|------------------------|-----------|-----------------------------------------------------------------------|------------|-------------|------------|
| 219714_s_at  | 55799 CACNA2D3         | Hs.656687 | calcium channel, voltage-dependent, alpha                             | -3.4345267 | -0.89005566 | 0.89005566 |
| 208161_s_at  | 8714 ABCC3             | Hs.463421 | ATP-binding cassette, sub-family C (CFTR)                             | -3.4432263 | -0.891881   | 0.89188004 |
| 203989_x_at  | 2149 F2R               | Hs.482562 | coagulation factor II (thrombin) receptor                             | -3.453564  | -0.89404297 | 0.89404297 |
| 236798_at    |                        |           |                                                                       | -3.4606712 | -0.89552593 | 0.89552593 |
| 221731_x_at  | 1462 VCAN              | Hs.643801 | versican                                                              | -3.4669955 | -0.89684296 | 0.89684296 |
| 235004_at    | 221662 RBM24           | Hs.519904 | RNA binding motif protein 24                                          | -3.4705908 | -0.89759064 | 0.89759064 |
| 230527_at    |                        | Hs.127274 |                                                                       | -3.4808242 | -0.89971447 | 0.89971447 |
| 222945_x_at  | 55301 OLAH             | Hs.24309  | oleoyl-ACP hydrolase                                                  | -3.4819427 | -0.8999462  | 0.8999462  |
| 223402_at    | 54935 DUSP23           | Hs.425801 | dual specificity phosphatase 23                                       | -3.4848855 | -0.9005556  | 0.9005556  |
| 243996_at    |                        |           |                                                                       | -3.4866688 | -0.9009247  | 0.9009247  |
| 228754_at    | 6533 SLC6A6            | Hs.529488 | solute carrier family 6 (neurotransmitter transporter)                | -3.4873557 | -0.9010668  | 0.9010668  |
| 218418_s_at  | 25959 KANK2            | Hs.284208 | KN motif and ankyrin repeat domains 2                                 | -3.495369  | -0.90272236 | 0.90272236 |
| 203708_at    | 5142 PDE4B             | Hs.198072 | phosphodiesterase 4B, cAMP-specific                                   | -3.4993258 | -0.9035382  | 0.9035382  |
| 1563077_at   | 100289058 LOC100289058 | Hs.348525 | Hypothetical protein LOC100289058                                     | -3.5039759 | -0.90449667 | 0.9044962  |
| 226433_at    | 114804 RNF157          | Hs.500643 | ring finger protein 157                                               | -3.5047972 | -0.90466547 | 0.90466547 |
| 209086_x_at  | 4162 MCAM              | Hs.599039 | melanoma cell adhesion molecule                                       | -3.5142055 | -0.9065995  | 0.90659904 |
| 205945_at    | 3570 IL6R              | Hs.709210 | interleukin 6 receptor                                                | -3.5157902 | -0.9069247  | 0.90692425 |
| 230435_at    | 375190 LOC375190       | Hs.710370 | hypothetical protein LOC375190                                        | -3.53277   | -0.9103999  | 0.9103999  |
| 228132_at    | 84448 ABLIM2           | Hs.233404 | actin binding LIM protein family, member 2                            | -3.543763  | -0.91264105 | 0.91264105 |
| 205960_at    | 5166 PDK4              | Hs.8364   | pyruvate dehydrogenase kinase, isozyme alpha                          | -3.5472012 | -0.91334057 | 0.91334057 |
| 229838_at    | 4925 NUCB2             | Hs.654599 | nucleobindin 2                                                        | -3.5481098 | -0.9135251  | 0.9135256  |
| 1558199_at   | 2335 FN1               | Hs.203717 | fibronectin 1                                                         | -3.5556386 | -0.9150543  | 0.9150543  |
| 1557227_s_at | 7175 TPR               | Hs.279640 | translocated promoter region (to activated c-fos)                     | -3.5557148 | -0.91507006 | 0.9150696  |
| 206742_at    | 2277 FIGF              | Hs.11392  | c-fos induced growth factor (vascular endothelial cell growth factor) | -3.5676363 | -0.9174843  | 0.9174843  |
| 236599_at    |                        |           |                                                                       | -3.5686176 | -0.91768265 | 0.91768265 |
| 242324_x_at  | 147372 CCBE1           | Hs.34333  | collagen and calcium binding EGF domain                               | -3.5705643 | -0.91807604 | 0.91807604 |
| 201272_at    | 231 AKR1B1             | Hs.521212 | aldo-keto reductase family 1, member B1                               | -3.5832424 | -0.9206333  | 0.92063236 |
| 243974_at    |                        | Hs.648410 |                                                                       | -3.5924802 | -0.9224901  | 0.9224901  |
| 219928_s_at  | 26256 CABYR            | Hs.511983 | calcium binding tyrosine-(Y)-phosphorylated neuropilin 1              | -3.5977407 | -0.92354584 | 0.92354536 |
| 212298_at    | 8829 NRP1              | Hs.131704 | neuropilin 1                                                          | -3.612842  | -0.9265671  | 0.9265671  |
| 203921_at    | 9435 CHST2             | Hs.8786   | carbohydrate (N-acetylglucosamine-6-O) sulfotransferase 2             | -3.619918  | -0.9279785  | 0.9279785  |
| 243805_at    | 147372 CCBE1           | Hs.34333  | collagen and calcium binding EGF domain                               | -3.635962  | -0.93116856 | 0.93116856 |
| 203665_at    | 3162 HMOX1             | Hs.517581 | heme oxygenase (decycling) 1                                          | -3.637289  | -0.9314318  | 0.9314318  |
| 205027_s_at  | 1326 MAP3K8            | Hs.432453 | mitogen-activated protein kinase kinase 8                             | -3.643482  | -0.9326587  | 0.93265915 |
| 242868_at    |                        | Hs.691259 |                                                                       | -3.6444454 | -0.9328494  | 0.9328499  |
| 1552309_a_at | 91624 NEXN             | Hs.612385 | nexilin (F actin binding protein)                                     | -3.6536345 | -0.93466616 | 0.93466616 |
| 242809_at    | 9173 IL1RL1            | Hs.66     | interleukin 1 receptor-like 1                                         | -3.6606114 | -0.9360423  | 0.9360423  |
| 238919_at    |                        | Hs.656886 |                                                                       | -3.662952  | -0.9365034  | 0.9365034  |
| 1559739_at   | 56994 CHPT1            | Hs.293077 | Choline phosphotransferase 1                                          | -3.6638482 | -0.93667984 | 0.93667984 |
| 227396_at    | 5795 PTPRJ             | Hs.318547 | protein tyrosine phosphatase, receptor type 2                         | -3.6659932 | -0.93710184 | 0.9371023  |
| 219049_at    | 55790 CSGALNACT1       | Hs.613729 | chondroitin sulfate N-acetylgalactosaminyltransferase 1               | -3.6712813 | -0.9381418  | 0.9381418  |
| 213338_at    | 25907 TMEM158          | Hs.35861  | transmembrane protein 158 (gene/pseudogene)                           | -3.6759012 | -0.93904924 | 0.93904877 |
| 231879_at    | 1303 COL12A1           | Hs.101302 | collagen, type XII, alpha 1                                           | -3.6779783 | -0.93945646 | 0.93945646 |

|              |                                 |           |                                              |            |             |            |
|--------------|---------------------------------|-----------|----------------------------------------------|------------|-------------|------------|
| 240815_at    |                                 | Hs.657583 |                                              | -3.6852038 | -0.9408722  | 0.9408722  |
| 203186_s_at  | 6275 S100A4                     | Hs.654444 | S100 calcium binding protein A4              | -3.6908305 | -0.94197273 | 0.94197273 |
| 214078_at    |                                 | Hs.655757 |                                              | -3.6920786 | -0.9422164  | 0.9422169  |
| 209101_at    | 1490 CTGF                       | Hs.410037 | connective tissue growth factor              | -3.6957524 | -0.94293404 | 0.94293404 |
| 209210_s_at  | 10979 FERMT2                    | Hs.509343 | fermitin family member 2                     | -3.6994383 | -0.9436531  | 0.9436531  |
| 236264_at    | 23284 LPHN3                     | Hs.28391  | latrophilin 3                                | -3.7222154 | -0.948081   | 0.94808054 |
| 209209_s_at  | 10979 FERMT2                    | Hs.509343 | fermitin family member 2                     | -3.728553  | -0.94930744 | 0.9493084  |
| 203058_s_at  | 9060 PAPSS2                     | Hs.524491 | 3'-phosphoadenosine 5'-phosphosulfate sy     | -3.7406175 | -0.9516382  | 0.9516382  |
| 241837_at    |                                 |           |                                              | -3.7443678 | -0.9523611  | 0.9523611  |
| 228482_at    | 284040 CDRT4                    | Hs.164595 | CMT1A duplicated region transcript 4         | -3.7514734 | -0.9537287  | 0.9537287  |
| 1553772_at   | 256356 GK5                      | Hs.135904 | glycerol kinase 5 (putative)                 | -3.7630088 | -0.9559431  | 0.9559436  |
| 213156_at    |                                 | Hs.592414 |                                              | -3.7672536 | -0.9567566  | 0.9567566  |
| 228702_at    | 378805 FLJ43663                 | Hs.702887 | hypothetical LOC378805                       | -3.7708027 | -0.9574361  | 0.9574356  |
| 204439_at    | 10964 IFI44L                    | Hs.724492 | interferon-induced protein 44-like           | -3.7758799 | -0.95840645 | 0.95840645 |
| 217678_at    | 23657 SLC7A11                   | Hs.390594 | solute carrier family 7, (cationic amino ac  | -3.7840807 | -0.9599714  | 0.9599714  |
| 207980_s_at  | 10370 CITED2                    | Hs.82071  | Cbp/p300-interacting transactivator, with    | -3.787299  | -0.96058464 | 0.96058464 |
| 1557437_a_at |                                 | Hs.655836 |                                              | -3.8220406 | -0.96717143 | 0.96717167 |
| 52837_at     | 85352 KIAA1644                  | Hs.6829   | KIAA1644                                     | -3.8331602 | -0.9692669  | 0.96926737 |
| 213158_at    |                                 | Hs.592414 |                                              | -3.8353221 | -0.96967363 | 0.9696741  |
| 210663_s_at  | 8942 KYNU                       | Hs.470126 | kynureninase (L-kynurenine hydrolase)        | -3.8372912 | -0.97004414 | 0.97004414 |
| 223378_at    | 84662 GLIS2                     | Hs.592087 | GLIS family zinc finger 2                    | -3.861633  | -0.97460556 | 0.97460556 |
| 209357_at    | 10370 CITED2                    | Hs.82071  | Cbp/p300-interacting transactivator, with    | -3.8707416 | -0.976305   | 0.976305   |
| 211737_x_at  | 5764 PTN                        | Hs.371249 | pleiotrophin                                 | -3.903916  | -0.982461   | 0.982461   |
| 201266_at    | 7296 TXNRD1                     | Hs.724443 | thioredoxin reductase 1                      | -3.9068975 | -0.9830122  | 0.98301125 |
| 244455_at    | 343450 KCNT2                    | Hs.657046 | potassium channel, subfamily T, member       | -3.9110947 | -0.98378634 | 0.9837861  |
| 234066_at    | 9173 IL1RL1                     | Hs.66     | interleukin 1 receptor-like 1                | -3.939327  | -0.9889746  | 0.9889746  |
| 209183_s_at  | 11067 C10orf10                  | Hs.93675  | chromosome 10 open reading frame 10          | -3.94229   | -0.9895172  | 0.98951674 |
| 1552658_a_at | 89795 NAV3                      | Hs.655301 | neuron navigator 3                           | -3.945133  | -0.99003696 | 0.99003696 |
| 215446_s_at  | 4015 LOX                        | Hs.102267 | lysyl oxidase                                | -3.947794  | -0.99052334 | 0.99052334 |
| 206090_s_at  | 100303453 /// 27 DISC1 /// TSNA | Hs.13318  | disrupted in schizophrenia 1 /// TSNAX-I     | -3.9524183 | -0.9913678  | 0.9913678  |
| 1563467_at   |                                 | Hs.683994 |                                              | -3.9532714 | -0.99152374 | 0.99152327 |
| 37408_at     | 9902 MRC2                       | Hs.7835   | mannose receptor, C type 2                   | -3.9624612 | -0.9931984  | 0.9931984  |
| 200665_s_at  | 6678 SPARC                      | Hs.111779 | secreted protein, acidic, cysteine-rich (ost | -3.9719334 | -0.99492073 | 0.99492073 |
| 202437_s_at  | 1545 CYP1B1                     | Hs.154654 | cytochrome P450, family 1, subfamily B,      | -3.9883142 | -0.9978895  | 0.9978895  |
| 239336_at    |                                 |           |                                              | -3.9947996 | -0.9990616  | 0.9990616  |
| 224989_at    |                                 | Hs.720403 |                                              | -3.999799  | -0.99996376 | 0.99996376 |
| 219295_s_at  | 26577 PCOLCE2                   | Hs.8944   | procollagen C-endopeptidase enhancer 2       | -4.016316  | -1.0029364  | 1.0029364  |
| 209276_s_at  | 2745 GLRX                       | Hs.28988  | glutaredoxin (thioltransferase)              | -4.0381775 | -1.0068521  | 1.0068521  |
| 201069_at    | 4313 MMP2                       | Hs.513617 | matrix metalloproteinase 2 (gelatinase A, 7  | -4.045655  | -1.0081863  | 1.0081868  |
| 215646_s_at  | 1462 VCAN                       | Hs.643801 | versican                                     | -4.052405  | -1.0093894  | 1.0093889  |
| 209890_at    | 10098 TSPAN5                    | Hs.118118 | tetraspanin 5                                | -4.0572014 | -1.0102425  | 1.0102425  |
| 57715_at     | 51063 CALHM2                    | Hs.241545 | calcium homeostasis modulator 2              | -4.0677714 | -1.0121193  | 1.0121193  |
| 210764_s_at  | 3491 CYR61                      | Hs.8867   | cysteine-rich, angiogenic inducer, 61        | -4.078843  | -1.01408    | 1.01408    |



|              |                              |           |                                            |            |            |           |
|--------------|------------------------------|-----------|--------------------------------------------|------------|------------|-----------|
| 222719_s_at  | 56034 PDGFC                  | Hs.570855 | platelet derived growth factor C           | -4.0797453 | -1.0142398 | 1.0142393 |
| 220334_at    | 26575 RGS17                  | Hs.166313 | regulator of G-protein signaling 17        | -4.0985465 | -1.0175562 | 1.0175562 |
| 202214_s_at  | 8450 CUL4B                   | Hs.102914 | cullin 4B                                  | -4.108358  | -1.0192814 | 1.0192804 |
| 214621_at    | 2998 GYS2                    | Hs.82614  | glycogen synthase 2 (liver)                | -4.1269274 | -1.0225341 | 1.0225339 |
| 239367_at    | 627 BDNF                     | Hs.502182 | brain-derived neurotrophic factor          | -4.131758  | -1.0233779 | 1.0233779 |
| 203889_at    | 6447 SCG5                    | Hs.156540 | secretogranin V (7B2 protein)              | -4.1329737 | -1.0235901 | 1.0235901 |
| 201278_at    | 1601 DAB2                    | Hs.481980 | disabled homolog 2, mitogen-responsive p   | -4.133422  | -1.0236683 | 1.0236683 |
| 203895_at    | 5332 PLCB4                   | Hs.472101 | phospholipase C, beta 4                    | -4.1431165 | -1.0253582 | 1.0253582 |
| 202436_s_at  | 1545 CYP1B1                  | Hs.154654 | cytochrome P450, family 1, subfamily B,    | -4.158185  | -1.027977  | 1.027977  |
| 226614_s_at  | 83648 FAM167A                | Hs.124299 | family with sequence similarity 167, mem   | -4.164523  | -1.0290756 | 1.0290756 |
| 209641_s_at  | 8714 ABCC3                   | Hs.463421 | ATP-binding cassette, sub-family C (CFI    | -4.1782217 | -1.0314445 | 1.0314445 |
| 222880_at    | 10000 AKT3                   | Hs.498292 | v-akt murine thymoma viral oncogene hor    | -4.178574  | -1.0315056 | 1.0315051 |
| 1552607_at   | 100132967 NCRNA00204         | Hs.391764 | non-protein coding RNA 204                 | -4.182482  | -1.0321798 | 1.0321794 |
| 202765_s_at  | 2200 FBN1                    | Hs.591133 | fibrillin 1                                | -4.1952662 | -1.0343809 | 1.0343814 |
| 218651_s_at  | 55323 LARP6                  | Hs.416755 | La ribonucleoprotein domain family, men    | -4.207294  | -1.0364461 | 1.0364466 |
| 233223_at    |                              |           |                                            | -4.20976   | -1.036869  | 1.036869  |
| 202948_at    | 3554 IL1R1                   | Hs.701982 | interleukin 1 receptor, type I             | -4.2097993 | -1.0368757 | 1.0368757 |
| 229487_at    | 1879 EBF1                    | Hs.573143 | early B-cell factor 1                      | -4.218322  | -1.0383348 | 1.0383344 |
| 1554867_a_at | 51334 PRR16                  | Hs.157461 | proline rich 16                            | -4.229029  | -1.040163  | 1.0401635 |
| 207624_s_at  | 6103 RPGR                    | Hs.61438  | retinitis pigmentosa GTPase regulator      | -4.236314  | -1.0414047 | 1.0414047 |
| 204575_s_at  | 4327 MMP19                   | Hs.591033 | matrix metalloproteinase 19                | -4.243842  | -1.0426855 | 1.0426855 |
| 205110_s_at  | 2258 FGF13                   | Hs.6540   | fibroblast growth factor 13                | -4.252985  | -1.0442376 | 1.0442381 |
| 204105_s_at  | 4897 NRCAM                   | Hs.21422  | neuronal cell adhesion molecule            | -4.2648892 | -1.0462542 | 1.0462542 |
| 209201_x_at  | 7852 CXCR4                   | Hs.593413 | chemokine (C-X-C motif) receptor 4         | -4.291463  | -1.050735  | 1.0507345 |
| 202435_s_at  | 1545 CYP1B1                  | Hs.154654 | cytochrome P450, family 1, subfamily B,    | -4.311576  | -1.0541077 | 1.0541077 |
| 232125_at    |                              | Hs.587185 |                                            | -4.325182  | -1.0563805 | 1.0563803 |
| 212912_at    | 6196 RPS6KA2                 | Hs.655277 | ribosomal protein S6 kinase, 90kDa, poly   | -4.327326  | -1.0567379 | 1.0567379 |
| 1559400_s_at | 5069 PAPPA                   | Hs.643599 | pregnancy-associated plasma protein A, p   | -4.338032  | -1.0585203 | 1.0585203 |
| 212423_at    | 219654 ZCCHC24               | Hs.523080 | zinc finger, CCHC domain containing 24     | -4.353418  | -1.0610743 | 1.0610743 |
| 225540_at    | 4133 MAP2                    | Hs.368281 | microtubule-associated protein 2           | -4.369956  | -1.0638094 | 1.0638094 |
| 227240_at    | 25791 NGEF                   | Hs.97316  | neuronal guanine nucleotide exchange fac   | -4.3715973 | -1.0640802 | 1.0640802 |
| 204151_x_at  | 1645 AKR1C1                  | Hs.460260 | aldo-keto reductase family 1, member C1    | -4.38181   | -1.0657635 | 1.0657635 |
| 228640_at    | 5099 PCDH7                   | Hs.479439 | protocadherin 7                            | -4.3956337 | -1.0680356 | 1.0680356 |
| 204140_at    | 8460 TPST1                   | Hs.724538 | tyrosylprotein sulfotransferase 1          | -4.4079275 | -1.0700502 | 1.0700502 |
| 1561079_at   | 23243 ANKRD28                | Hs.335239 | ankyrin repeat domain 28                   | -4.4213777 | -1.072248  | 1.072248  |
| 226953_at    | 2532 /// 57863 CADM3 /// DAF | Hs.153381 | cell adhesion molecule 3 /// Duffy blood g | -4.435109  | -1.0744848 | 1.0744848 |
| 232882_at    |                              | Hs.687769 |                                            | -4.453552  | -1.0774779 | 1.0774784 |
| 228737_at    | 84969 TOX2                   | Hs.26608  | TOX high mobility group box family men     | -4.454248  | -1.077591  | 1.077591  |
| 203896_s_at  | 5332 PLCB4                   | Hs.472101 | phospholipase C, beta 4                    | -4.4549665 | -1.0777073 | 1.0777073 |
| 220407_s_at  | 7042 TGFB2                   | Hs.133379 | transforming growth factor, beta 2         | -4.470371  | -1.0801971 | 1.0801973 |
| 205158_at    | 6038 RNASE4                  |           | ribonuclease, RNase A family, 4            | -4.482862  | -1.0822101 | 1.0822101 |
| 212494_at    | 23371 TENC1                  | Hs.6147   | tensin like C1 domain containing phospho   | -4.4829793 | -1.0822291 | 1.0822287 |
| 220180_at    | 80323 CCDC68                 | Hs.120790 | coiled-coil domain containing 68           | -4.49581   | -1.0842905 | 1.0842905 |

|              |                 |           |                                             |            |            |           |
|--------------|-----------------|-----------|---------------------------------------------|------------|------------|-----------|
| 218332_at    | 55859 BEX1      | Hs.334370 | brain expressed, X-linked 1                 | -4.49914   | -1.0848246 | 1.0848246 |
| 210662_at    | 8942 KYNU       | Hs.470126 | kynureninase (L-kynurenine hydrolase)       | -4.5029926 | -1.0854421 | 1.0854421 |
| 203939_at    | 4907 NT5E       | Hs.153952 | 5'-nucleotidase, ecto (CD73)                | -4.505145  | -1.0857868 | 1.0857868 |
| 205767_at    | 2069 EREG       | Hs.115263 | epiregulin                                  | -4.505969  | -1.0859189 | 1.0859184 |
| 229041_s_at  |                 | Hs.661035 |                                             | -4.5194745 | -1.0880775 | 1.0880775 |
| 238127_at    | 650669 FLJ41484 | Hs.720848 | hypothetical LOC650669                      | -4.5344057 | -1.090457  | 1.0904565 |
| 210015_s_at  | 4133 MAP2       | Hs.368281 | microtubule-associated protein 2            | -4.5394306 | -1.0912557 | 1.0912557 |
| 235392_at    |                 | Hs.720470 |                                             | -4.5547857 | -1.0936918 | 1.0936913 |
| 231146_at    | 196792 FAM24B   | Hs.114648 | family with sequence similarity 24, memb    | -4.5707726 | -1.0962191 | 1.0962191 |
| 204236_at    | 2313 FLII       | Hs.504281 | Friend leukemia virus integration 1         | -4.593344  | -1.0997725 | 1.0997725 |
| 209699_x_at  | 1646 AKR1C2     | Hs.567256 | aldo-keto reductase family 1, member C2     | -4.598044  | -1.1005106 | 1.1005096 |
| 203217_s_at  | 8869 ST3GAL5    | Hs.415117 | ST3 beta-galactoside alpha-2,3-sialyltrans  | -4.598802  | -1.1006293 | 1.1006289 |
| 209581_at    | 11145 PLA2G16   | Hs.502775 | phospholipase A2, group XVI                 | -4.604574  | -1.1015339 | 1.1015339 |
| 225115_at    | 28996 HIPK2     | Hs.724392 | homeodomain interacting protein kinase 2    | -4.619086  | -1.1038036 | 1.1038036 |
| 212419_at    | 219654 ZCCHC24  | Hs.523080 | zinc finger, CCHC domain containing 24      | -4.6268353 | -1.1050129 | 1.1050129 |
| 204115_at    | 2791 GNG11      | Hs.83381  | guanine nucleotide binding protein (G prc   | -4.6320624 | -1.1058273 | 1.1058273 |
| 1555538_s_at | 171483 FAM9B    | Hs.371894 | family with sequence similarity 9, membe    | -4.6327868 | -1.1059403 | 1.1059399 |
| 213429_at    | 80114 BICC1     | Hs.158745 | bicaudal C homolog 1 (Drosophila)           | -4.638699  | -1.1068602 | 1.1068602 |
| 207264_at    | 11015 KDELR3    | Hs.720434 | KDEL (Lys-Asp-Glu-Leu) endoplasmic r        | -4.687123  | -1.1143513 | 1.1143513 |
| 215209_at    | 9871 SEC24D     | Hs.189641 | SEC24 family, member D (S. cerevisiae)      | -4.688786  | -1.1146071 | 1.1146073 |
| 203440_at    | 1000 CDH2       | Hs.464829 | cadherin 2, type 1, N-cadherin (neuronal)   | -4.7355256 | -1.1217623 | 1.1217623 |
| 217764_s_at  | 11031 RAB31     | Hs.724447 | RAB31, member RAS oncogene family           | -4.739838  | -1.1224189 | 1.1224189 |
| 205830_at    | 1047 CLGN       | Hs.86368  | calmegin                                    | -4.7823224 | -1.1288557 | 1.1288557 |
| 206157_at    | 5806 PTX3       | Hs.591286 | pentraxin 3, long                           | -4.8269663 | -1.1355586 | 1.1355581 |
| 225516_at    | 6542 SLC7A2     | Hs.448520 | solute carrier family 7 (cationic amino aci | -4.8751225 | -1.1427193 | 1.1427193 |
| 224341_x_at  | 7099 TLR4       | Hs.174312 | toll-like receptor 4                        | -4.8986044 | -1.1461854 | 1.1461854 |
| 206758_at    | 1907 EDN2       | Hs.1407   | endothelin 2                                | -4.945216  | -1.153017  | 1.1530166 |
| 213325_at    | 25945 PVRL3     | Hs.293917 | poliovirus receptor-related 3               | -4.9791102 | -1.1579442 | 1.1579437 |
| 225207_at    | 5166 PDK4       | Hs.8364   | pyruvate dehydrogenase kinase, isozyme 4    | -4.9864635 | -1.159009  | 1.159008  |
| 212886_at    | 26112 CCDC69    | Hs.655336 | coiled-coil domain containing 69            | -4.993592  | -1.160039  | 1.160039  |
| 209160_at    | 8644 AKR1C3     | Hs.78183  | aldo-keto reductase family 1, member C3     | -5.0164933 | -1.1633396 | 1.1633396 |
| 205226_at    | 5157 PDGFRL     | Hs.458573 | platelet-derived growth factor receptor-lik | -5.017085  | -1.163425  | 1.1634245 |
| 213397_x_at  | 6038 RNASE4     |           | ribonuclease, RNase A family, 4             | -5.0219197 | -1.1641192 | 1.1641197 |
| 214212_x_at  | 10979 FERMT2    | Hs.509343 | fermitin family member 2                    | -5.036897  | -1.1662679 | 1.1662674 |
| 235030_at    | 91775 FAM55C    | Hs.595933 | family with sequence similarity 55, memb    | -5.0536375 | -1.1686611 | 1.1686611 |
| 220301_at    | 79839 CCDC102B  | Hs.280781 | coiled-coil domain containing 102B          | -5.056848  | -1.1691191 | 1.1691194 |
| 215330_at    |                 | Hs.671957 |                                             | -5.0644193 | -1.1701984 | 1.1701984 |
| 204686_at    | 3667 IRS1       | Hs.471508 | insulin receptor substrate 1                | -5.077479  | -1.1720562 | 1.1720562 |
| 227529_s_at  | 9590 AKAP12     | Hs.371240 | A kinase (PRKA) anchor protein 12           | -5.137154  | -1.1804845 | 1.1804848 |
| 202149_at    | 4739 NEDD9      | Hs.37982  | neural precursor cell expressed, developm   | -5.1494846 | -1.1822138 | 1.1822143 |
| 1557278_s_at | 3842 TNPO1      | Hs.482497 | Transportin 1                               | -5.1582336 | -1.1834388 | 1.1834383 |
| 239968_at    | 114038 C21orf84 | Hs.592161 | chromosome 21 open reading frame 84         | -5.1589613 | -1.1835403 | 1.1835403 |
| 205407_at    | 8434 RECK       | Hs.388918 | reversion-inducing-cysteine-rich protein v  | -5.161083  | -1.1838369 | 1.1838369 |

|              |                  |           |                                                                 |            |            |           |
|--------------|------------------|-----------|-----------------------------------------------------------------|------------|------------|-----------|
| 231766_s_at  | 1303 COL12A1     | Hs.101302 | collagen, type XII, alpha 1                                     | -5.1843004 | -1.1870747 | 1.1870747 |
| 232918_at    | 541471 LOC541471 | Hs.652426 | Hypothetical LOC541471                                          | -5.1997104 | -1.1892157 | 1.1892157 |
| 202213_s_at  | 8450 CUL4B       | Hs.102914 | cullin 4B                                                       | -5.219067  | -1.1918955 | 1.1918964 |
| 1555097_a_at | 5737 PTGFR       | Hs.654365 | prostaglandin F receptor (FP)                                   | -5.23313   | -1.1938369 | 1.1938372 |
| 243357_at    | 257194 NEGR1     | Hs.146542 | neuronal growth regulator 1                                     | -5.2449856 | -1.1954694 | 1.1954694 |
| 210119_at    | 3772 KCNJ15      | Hs.411299 | potassium inwardly-rectifying channel, su                       | -5.2961936 | -1.2024779 | 1.2024779 |
| 210257_x_at  | 8450 CUL4B       | Hs.102914 | cullin 4B                                                       | -5.335469  | -1.2078075 | 1.2078075 |
| 231175_at    | 221336 BEND6     | Hs.582993 | BEN domain containing 6                                         | -5.348047  | -1.209506  | 1.209506  |
| 203875_at    | 6594 SMARCA1     | Hs.152292 | SWI/SNF related, matrix associated, actin                       | -5.371274  | -1.2126322 | 1.2126322 |
| 213413_at    | 11037 STON1      | Hs.44385  | stonin 1                                                        | -5.3801465 | -1.2138226 | 1.2138228 |
| 238688_at    | 7168 TPM1        | Hs.133892 | Tropomyosin 1 (alpha)                                           | -5.4650526 | -1.2251177 | 1.2251177 |
| 237290_at    |                  | Hs.658819 |                                                                 | -5.474895  | -1.2264156 | 1.2264156 |
| 206766_at    | 8515 ITGA10      | Hs.158237 | integrin, alpha 10                                              | -5.4789715 | -1.2269526 | 1.2269526 |
| 204955_at    | 8406 SRPX        | Hs.15154  | sushi-repeat-containing protein, X-linked                       | -5.480051  | -1.2270947 | 1.2270947 |
| 202686_s_at  | 558 AXL          | Hs.590970 | AXL receptor tyrosine kinase                                    | -5.5765615 | -1.2396879 | 1.2396879 |
| 201721_s_at  | 7805 LAPTM5      | Hs.371021 | lysosomal protein transmembrane 5                               | -5.583127  | -1.2405367 | 1.2405367 |
| 1555938_x_at | 7431 VIM         |           | vimentin                                                        | -5.6303763 | -1.2466154 | 1.2466159 |
| 217762_s_at  | 11031 RAB31      | Hs.724447 | RAB31, member RAS oncogene family                               | -5.6349244 | -1.2471981 | 1.2471981 |
| 240450_at    |                  | Hs.656768 |                                                                 | -5.649067  | -1.2490063 | 1.2490063 |
| 205082_s_at  | 316 AOX1         | Hs.406238 | aldehyde oxidase 1                                              | -5.669987  | -1.2516727 | 1.2516727 |
| 228333_at    | 9839 ZEB2        | Hs.34871  | zinc finger E-box binding homeobox 2                            | -5.6914988 | -1.2544041 | 1.2544045 |
| 229307_at    |                  |           |                                                                 | -5.8148637 | -1.2698727 | 1.2698727 |
| 231227_at    | 7474 WNT5A       | Hs.643085 | Wingless-type MMTV integration site far                         | -5.8339195 | -1.272233  | 1.2722325 |
| 203060_s_at  | 9060 PAPSS2      | Hs.524491 | 3'-phosphoadenosine 5'-phosphosulfate sy                        | -5.8584847 | -1.2752638 | 1.2752638 |
| 230147_at    | 2151 F2RL2       | Hs.42502  | coagulation factor II (thrombin) receptor-I                     | -5.888788  | -1.2789853 | 1.2789855 |
| 204422_s_at  | 2247 FGF2        | Hs.284244 | fibroblast growth factor 2 (basic)                              | -5.9013777 | -1.2805257 | 1.2805262 |
| 229778_at    | 80763 C12orf39   | Hs.130692 | chromosome 12 open reading frame 39                             | -5.9346204 | -1.2845778 | 1.2845778 |
| 213493_at    | 25992 SNED1      | Hs.471834 | sushi, nidogen and EGF-like domains 1                           | -5.947934  | -1.2861943 | 1.2861943 |
| 217763_s_at  | 11031 RAB31      | Hs.724447 | RAB31, member RAS oncogene family                               | -5.971299  | -1.2890224 | 1.2890224 |
| 219975_x_at  | 55301 OLAH       | Hs.24309  | oleoyl-ACP hydrolase                                            | -5.972932  | -1.2892199 | 1.2892194 |
| 209612_s_at  | 125 ADH1B        | Hs.4      | alcohol dehydrogenase 1B (class I), beta f                      | -5.9768834 | -1.2896967 | 1.2896967 |
| 223618_at    | 56776 FMN2       | Hs.24889  | formin 2                                                        | -5.9972563 | -1.2921512 | 1.2921515 |
| 204602_at    | 22943 DKK1       | Hs.40499  | dickkopf homolog 1 (Xenopus laevis)                             | -6.0195193 | -1.2948246 | 1.2948236 |
| 207177_at    | 5737 PTGFR       | Hs.654365 | prostaglandin F receptor (FP)                                   | -6.0206714 | -1.2949624 | 1.2949619 |
| 219014_at    | 51316 PLAC8      | Hs.546392 | placenta-specific 8                                             | -6.053297  | -1.2988605 | 1.2988605 |
| 242002_at    | 154215 NKAIN2    | Hs.656604 | Na <sup>+</sup> /K <sup>+</sup> transporting ATPase interacting | -6.056795  | -1.2992773 | 1.2992773 |
| 208782_at    | 11167 FSTL1      | Hs.269512 | folliculin-like 1                                               | -6.081034  | -1.3021584 | 1.3021584 |
| 228890_at    | 84913 ATOH8      | Hs.135569 | atonal homolog 8 (Drosophila)                                   | -6.102947  | -1.3047528 | 1.3047533 |
| 217529_at    | 80228 ORAI2      | Hs.363308 | ORAI calcium release-activated calcium r                        | -6.1059437 | -1.3051071 | 1.3051071 |
| 229641_at    | 147372 CCBE1     | Hs.34333  | collagen and calcium binding EGF domai                          | -6.1069365 | -1.3052244 | 1.3052244 |
| 217028_at    | 7852 CXCR4       | Hs.593413 | chemokine (C-X-C motif) receptor 4                              | -6.158211  | -1.3112559 | 1.3112555 |
| 224822_at    | 10395 DLC1       | Hs.134296 | deleted in liver cancer 1                                       | -6.187215  | -1.3146453 | 1.3146448 |
| 205896_at    | 6583 SLC22A4     | Hs.310591 | solute carrier family 22 (organic cation/er,                    | -6.2032027 | -1.3165069 | 1.3165064 |

|              |        |           |           |                                                      |            |            |           |
|--------------|--------|-----------|-----------|------------------------------------------------------|------------|------------|-----------|
| 202803_s_at  | 3689   | ITGB2     | Hs.375957 | integrin, beta 2 (complement component 2)            | -6.2345276 | -1.3201404 | 1.3201399 |
| 205100_at    | 9945   | GFPT2     | Hs.696497 | glutamine-fructose-6-phosphate transaminase          | -6.273355  | -1.3246188 | 1.3246183 |
| 210517_s_at  | 9590   | AKAP12    | Hs.371240 | A kinase (PRKA) anchor protein 12                    | -6.3059344 | -1.3283553 | 1.3283548 |
| 237056_at    | 387755 | INSC      | Hs.591997 | inscuteable homolog (Drosophila)                     | -6.3810415 | -1.336896  | 1.336896  |
| 215997_s_at  | 8450   | CUL4B     | Hs.102914 | cullin 4B                                            | -6.4188375 | -1.341156  | 1.341156  |
| 207265_s_at  | 11015  | KDELRL3   | Hs.720434 | KDEL (Lys-Asp-Glu-Leu) endoplasmic reticulum         | -6.475102  | -1.3474517 | 1.3474512 |
| 200982_s_at  | 309    | ANXA6     | Hs.412117 | annexin A6                                           | -6.4966655 | -1.3498497 | 1.3498497 |
| 241418_at    | 344887 | LOC344887 | Hs.128803 | Similar to hCG2041270                                | -6.547037  | -1.3554211 | 1.3554211 |
| 211653_x_at  | 1646   | AKR1C2    | Hs.567256 | aldo-keto reductase family 1, member C2              | -6.558867  | -1.3567238 | 1.3567228 |
| 215294_s_at  | 6594   | SMARCA1   | Hs.152292 | SWI/SNF related, matrix associated, actin            | -6.624789  | -1.3639371 | 1.3639374 |
| 216594_x_at  | 1645   | AKR1C1    | Hs.460260 | aldo-keto reductase family 1, member C1              | -6.6767335 | -1.3695707 | 1.3695717 |
| 202998_s_at  | 4017   | LOXL2     | Hs.626637 | lysyl oxidase-like 2                                 | -6.7066116 | -1.3727918 | 1.3727922 |
| 227530_at    | 9590   | AKAP12    | Hs.371240 | A kinase (PRKA) anchor protein 12                    | -6.731448  | -1.3754582 | 1.3754587 |
| 219799_s_at  | 10170  | DHRS9     | Hs.179608 | dehydrogenase/reductase (SDR family) member          | -6.7386007 | -1.3762245 | 1.3762245 |
| 210095_s_at  | 3486   | IGFBP3    | Hs.450230 | insulin-like growth factor binding protein 3         | -6.80172   | -1.3829498 | 1.3829498 |
| 239461_at    | 117248 | GALNTL2   | Hs.411308 | UDP-N-acetyl-alpha-D-galactosamine:protein           | -6.9264135 | -1.3960543 | 1.3960543 |
| 204823_at    | 89795  | NAV3      | Hs.655301 | neuron navigator 3                                   | -6.969444  | -1.4005218 | 1.4005218 |
| 201867_s_at  | 6907   | TBL1X     | Hs.495656 | transducin (beta)-like 1X-linked                     | -7.033477  | -1.4071188 | 1.4071193 |
| 201438_at    | 1293   | COL6A3    | Hs.233240 | collagen, type VI, alpha 3                           | -7.076669  | -1.4115353 | 1.4115353 |
| 212667_at    | 6678   | SPARC     | Hs.111779 | secreted protein, acidic, cysteine-rich (osteonin)   | -7.097967  | -1.413703  | 1.413703  |
| 209598_at    | 10687  | PNMA2     | Hs.591838 | paraneoplastic antigen MA2                           | -7.1175213 | -1.4156873 | 1.4156876 |
| 209613_s_at  | 125    | ADH1B     | Hs.4      | alcohol dehydrogenase 1B (class I), beta 1           | -7.22031   | -1.4260302 | 1.4260306 |
| 206707_x_at  | 9750   | FAM65B    | Hs.559459 | family with sequence similarity 65, member 2         | -7.269605  | -1.4309382 | 1.4309387 |
| 229893_at    | 257019 | FRMD3     | Hs.709357 | FERM domain containing 3                             | -7.423244  | -1.4460249 | 1.4460249 |
| 1553102_a_at | 26112  | CCDC69    | Hs.655336 | coiled-coil domain containing 69                     | -7.456529  | -1.4492521 | 1.4492521 |
| 204017_at    | 11015  | KDELRL3   | Hs.720434 | KDEL (Lys-Asp-Glu-Leu) endoplasmic reticulum         | -7.5281696 | -1.4561491 | 1.45615   |
| 217504_at    | 23460  | ABCA6     | Hs.709514 | ATP-binding cassette, sub-family A (ABC transporter) | -7.579371  | -1.4610391 | 1.4610391 |
| 202766_s_at  | 2200   | FBN1      | Hs.591133 | fibrillin 1                                          | -7.6396346 | -1.4667516 | 1.466752  |
| 210762_s_at  | 10395  | DLC1      | Hs.134296 | deleted in liver cancer 1                            | -7.696713  | -1.4721212 | 1.4721212 |
| 242358_at    |        |           | Hs.560092 |                                                      | -7.7202497 | -1.4743237 | 1.4743237 |
| 207526_s_at  | 9173   | IL1RL1    | Hs.66     | interleukin 1 receptor-like 1                        | -7.846513  | -1.4860258 | 1.4860258 |
| 203603_s_at  | 9839   | ZEB2      | Hs.34871  | zinc finger E-box binding homeobox 2                 | -7.867619  | -1.4879634 | 1.4879637 |
| 242979_at    | 3667   | IRS1      | Hs.471508 | insulin receptor substrate 1                         | -7.883585  | -1.4894261 | 1.4894257 |
| 1568765_at   | 5054   | SERPINE1  | Hs.414795 | serpin peptidase inhibitor, clade E (nexin),         | -8.14106   | -1.512608  | 1.5126085 |
| 202952_s_at  | 8038   | ADAM12    | Hs.594537 | ADAM metallopeptidase domain 12                      | -8.386179  | -1.5340066 | 1.5340071 |
| 232231_at    | 860    | RUNX2     | Hs.535845 | runt-related transcription factor 2                  | -8.397454  | -1.534976  | 1.534976  |
| 210869_s_at  | 4162   | MCAM      | Hs.599039 | melanoma cell adhesion molecule                      | -8.403837  | -1.5355239 | 1.5355244 |
| 230645_at    | 257019 | FRMD3     | Hs.709357 | FERM domain containing 3                             | -8.603889  | -1.5524945 | 1.5524945 |
| 211896_s_at  | 1634   | DCN       | Hs.156316 | decorin                                              | -8.606341  | -1.5527    | 1.5527    |
| 211813_x_at  | 1634   | DCN       | Hs.156316 | decorin                                              | -8.7933655 | -1.5682077 | 1.5682077 |
| 212233_at    | 4131   | MAP1B     | Hs.335079 | microtubule-associated protein 1B                    | -8.832006  | -1.5713706 | 1.5713706 |
| 205083_at    | 316    | AOX1      | Hs.406238 | aldehyde oxidase 1                                   | -8.8324795 | -1.5714092 | 1.5714092 |
| 226777_at    | 8038   | ADAM12    | Hs.594537 | ADAM metallopeptidase domain 12                      | -9.004985  | -1.5853624 | 1.5853615 |

|             |                 |           |                                             |            |            |           |
|-------------|-----------------|-----------|---------------------------------------------|------------|------------|-----------|
| 209087_x_at | 4162 MCAM       | Hs.599039 | melanoma cell adhesion molecule             | -9.087946  | -1.5919771 | 1.5919771 |
| 225664_at   | 1303 COL12A1    | Hs.101302 | collagen, type XII, alpha 1                 | -9.143395  | -1.596365  | 1.596365  |
| 235746_s_at |                 |           |                                             | -9.323204  | -1.6104128 | 1.6104131 |
| 1562321_at  | 5166 PDK4       | Hs.8364   | pyruvate dehydrogenase kinase, isozyme 4    | -9.354758  | -1.6128502 | 1.6128502 |
| 229014_at   | 441094 FLJ42709 | Hs.457407 | hypothetical LOC441094                      | -9.355024  | -1.6128707 | 1.6128707 |
| 226237_at   | 1295 COL8A1     | Hs.654548 | collagen, type VIII, alpha 1                | -9.435857  | -1.6190767 | 1.6190767 |
| 221921_s_at | 57863 CADM3     | Hs.365689 | cell adhesion molecule 3                    | -9.449251  | -1.6201    | 1.6201    |
| 1563469_at  |                 | Hs.684023 |                                             | -9.512776  | -1.6249332 | 1.6249332 |
| 208335_s_at | 2532 DARC       | Hs.153381 | Duffy blood group, chemokine receptor       | -9.587801  | -1.6306    | 1.6306    |
| 202627_s_at | 5054 SERPINE1   | Hs.414795 | serpin peptidase inhibitor, clade E (nexin, | -9.616835  | -1.632781  | 1.632781  |
| 210495_x_at | 2335 FN1        | Hs.203717 | fibronectin 1                               | -9.652819  | -1.6354752 | 1.6354752 |
| 203874_s_at | 6594 SMARCA1    | Hs.152292 | SWI/SNF related, matrix associated, actin   | -9.654708  | -1.6356163 | 1.6356163 |
| 202663_at   | 7456 WIPF1      | Hs.128067 | WAS/WASL interacting protein family, n      | -9.711383  | -1.6398385 | 1.6398382 |
| 216442_x_at | 2335 FN1        | Hs.203717 | fibronectin 1                               | -9.7997675 | -1.6463737 | 1.6463737 |
| 209335_at   | 1634 DCN        | Hs.156316 | decorin                                     | -9.812979  | -1.6473455 | 1.6473455 |
| 203680_at   | 5577 PRKAR2B    | Hs.433068 | protein kinase, cAMP-dependent, regulat     | -9.875665  | -1.6519389 | 1.6519389 |
| 211340_s_at | 4162 MCAM       | Hs.599039 | melanoma cell adhesion molecule             | -10.009483 | -1.6616478 | 1.6616478 |
| 205609_at   | 284 ANGPT1      | Hs.369675 | angiopoietin 1                              | -10.068479 | -1.6658869 | 1.6658869 |
| 231849_at   | 144501 KRT80    | Hs.140978 | keratin 80                                  | -10.070702 | -1.6660461 | 1.6660461 |
| 212464_s_at | 2335 FN1        | Hs.203717 | fibronectin 1                               | -10.154918 | -1.6720533 | 1.6720533 |
| 211719_x_at | 2335 FN1        | Hs.203717 | fibronectin 1                               | -10.211138 | -1.6760359 | 1.6760359 |
| 213488_at   | 25992 SNED1     | Hs.471834 | sushi, nidogen and EGF-like domains 1       | -10.222836 | -1.6768618 | 1.6768618 |
| 220330_s_at | 64092 SAMSNI    | Hs.473341 | SAM domain, SH3 domain and nuclear lc       | -10.224559 | -1.6769834 | 1.6769834 |
| 201893_x_at | 1634 DCN        | Hs.156316 | decorin                                     | -10.237321 | -1.6778831 | 1.6778831 |
| 213790_at   | 8038 ADAM12     | Hs.594537 | ADAM metallopeptidase domain 12             | -10.249472 | -1.6787391 | 1.6787386 |
| 213425_at   | 7474 WNT5A      | Hs.643085 | wingless-type MMTV integration site fan     | -10.346134 | -1.6855102 | 1.6855097 |
| 212764_at   | 6935 ZEB1       | Hs.124503 | zinc finger E-box binding homeobox 1        | -10.382867 | -1.6880665 | 1.6880665 |
| 227646_at   | 1879 EBF1       | Hs.573143 | early B-cell factor 1                       | -10.463688 | -1.6936598 | 1.6936598 |
| 206382_s_at | 627 BDNF        | Hs.502182 | brain-derived neurotrophic factor           | -10.963566 | -1.7273226 | 1.7273226 |
| 206029_at   | 27063 ANKRD1    | Hs.448589 | ankyrin repeat domain 1 (cardiac muscle)    | -11.203155 | -1.7429166 | 1.7429166 |
| 226084_at   | 4131 MAP1B      | Hs.335079 | microtubule-associated protein 1B           | -11.32302  | -1.7505932 | 1.7505937 |
| 226751_at   | 25927 CNRIP1    | Hs.212885 | cannabinoid receptor interacting protein 1  | -11.421011 | -1.7568092 | 1.7568092 |
| 1562102_at  | 1645 AKR1C1     | Hs.460260 | Aldo-keto reductase family 1, member C1     | -11.49226  | -1.7612953 | 1.7612953 |
| 205990_s_at | 7474 WNT5A      | Hs.643085 | wingless-type MMTV integration site fan     | -11.978398 | -1.7911816 | 1.7911816 |
| 205207_at   | 3569 IL6        | Hs.654458 | interleukin 6 (interferon, beta 2)          | -12.139157 | -1.8007979 | 1.8007984 |
| 229978_at   | 729993 SHISA9   | Hs.724830 | shisa homolog 9 (Xenopus laevis)            | -12.320913 | -1.8115187 | 1.8115187 |
| 214587_at   | 1295 COL8A1     | Hs.654548 | collagen, type VIII, alpha 1                | -12.414322 | -1.8169665 | 1.816967  |
| 202628_s_at | 5054 SERPINE1   | Hs.414795 | serpin peptidase inhibitor, clade E (nexin, | -12.426839 | -1.8176937 | 1.8176937 |
| 224009_x_at | 10170 DHRS9     | Hs.179608 | dehydrogenase/reductase (SDR family) m      | -12.807432 | -1.8394547 | 1.8394547 |
| 202664_at   | 7456 WIPF1      | Hs.128067 | WAS/WASL interacting protein family, n      | -13.659154 | -1.8858981 | 1.8858981 |
| 209909_s_at | 7042 TGFB2      | Hs.133379 | transforming growth factor, beta 2          | -13.815274 | -1.8940959 | 1.8940964 |
| 205608_s_at | 284 ANGPT1      | Hs.369675 | angiopoietin 1                              | -13.845522 | -1.8956738 | 1.8956738 |
| 229461_x_at | 257194 NEGR1    | Hs.146542 | neuronal growth regulator 1                 | -14.867603 | -1.9470501 | 1.9470501 |

|              |                              |           |                                             |             |            |           |
|--------------|------------------------------|-----------|---------------------------------------------|-------------|------------|-----------|
| 1556200_a_at | 118611 C10orf90              | Hs.587663 | chromosome 10 open reading frame 90         | -14.975254  | -1.9522543 | 1.9522543 |
| 223952_x_at  | 10170 DHRS9                  | Hs.179608 | dehydrogenase/reductase (SDR family) m      | -15.2023535 | -1.9631114 | 1.9631114 |
| 228121_at    | 7042 TGFB2                   | Hs.133379 | transforming growth factor, beta 2          | -16.578558  | -2.0256233 | 2.0256233 |
| 244503_at    |                              | Hs.671876 |                                             | -16.638216  | -2.0282145 | 2.0282145 |
| 237435_at    |                              | Hs.61596  |                                             | -17.168245  | -2.0508351 | 2.0508356 |
| 210222_s_at  | 6252 RTN1                    | Hs.368626 | reticulon 1                                 | -17.240131  | -2.0538497 | 2.0538492 |
| 201981_at    | 5069 PAPP                    | Hs.643599 | pregnancy-associated plasma protein A, p    | -17.321596  | -2.05725   | 2.05725   |
| 224942_at    | 5069 PAPP                    | Hs.643599 | pregnancy-associated plasma protein A, p    | -17.477352  | -2.0637074 | 2.0637074 |
| 212190_at    | 5270 SERPINE2                | Hs.38449  | serpin peptidase inhibitor, clade E (nexin, | -17.635206  | -2.0701933 | 2.0701933 |
| 224940_s_at  | 5069 PAPP                    | Hs.643599 | pregnancy-associated plasma protein A, p    | -17.97539   | -2.0839753 | 2.0839758 |
| 209829_at    | 9750 FAM65B                  | Hs.559459 | family with sequence similarity 65, memb    | -18.039228  | -2.086533  | 2.0865326 |
| 210809_s_at  | 10631 POSTN                  | Hs.136348 | periostin, osteoblast specific factor       | -18.078676  | -2.0881085 | 2.0881085 |
| 203485_at    | 6252 RTN1                    | Hs.368626 | reticulon 1                                 | -18.144512  | -2.0907307 | 2.0907307 |
| 228176_at    | 1903 S1PR3                   |           | sphingosine-1-phosphate receptor 3          | -19.479961  | -2.1419597 | 2.1419592 |
| 209505_at    | 7025 NR2F1                   | Hs.519445 | nuclear receptor subfamily 2, group F, me   | -19.508059  | -2.1429992 | 2.1429992 |
| 218723_s_at  | 28984 C13orf15               | Hs.507866 | chromosome 13 open reading frame 15         | -19.83042   | -2.1548219 | 2.1548214 |
| 228128_x_at  | 5069 PAPP                    | Hs.643599 | pregnancy-associated plasma protein A, p    | -19.9968    | -2.1608486 | 2.1608486 |
| 236361_at    | 117248 GALNTL2               | Hs.411308 | UDP-N-acetyl-alpha-D-galactosamine:po       | -20.140778  | -2.1660237 | 2.1660237 |
| 224941_at    | 5069 PAPP                    | Hs.643599 | pregnancy-associated plasma protein A, p    | -20.44172   | -2.176722  | 2.1767225 |
| 226771_at    | 57198 ATP8B2                 | Hs.435700 | ATPase, class I, type 8B, member 2          | -23.971252  | -2.291617  | 2.2916164 |
| 226279_at    | 11098 PRSS23                 | Hs.25338  | protease, serine, 23                        | -24.393763  | -2.3042202 | 2.3042202 |
| 217626_at    | 1645 AKR1C1                  | Hs.460260 | aldo-keto reductase family 1, member C1     | -24.584946  | -2.3098516 | 2.3098516 |
| 228501_at    | 117248 GALNTL2               | Hs.411308 | UDP-N-acetyl-alpha-D-galactosamine:po       | -24.93398   | -2.3200207 | 2.3200207 |
| 235743_at    |                              |           |                                             | -25.423904  | -2.3340569 | 2.3340569 |
| 213400_s_at  | 6907 TBL1X                   | Hs.495656 | transducin (beta)-like 1X-linked            | -25.943924  | -2.3486624 | 2.3486624 |
| 213948_x_at  | 57863 CADM3                  | Hs.365689 | cell adhesion molecule 3                    | -28.2643    | -2.4104543 | 2.4104548 |
| 1555854_at   | 1645 /// 1646 AKR1C1 /// AKI | Hs.567256 | aldo-keto reductase family 1, member C1     | -28.763153  | -2.4230752 | 2.4230747 |
| 202458_at    | 11098 PRSS23                 | Hs.25338  | protease, serine, 23                        | -30.866488  | -2.4739847 | 2.4739847 |
| 220014_at    | 51334 PRR16                  | Hs.157461 | proline rich 16                             | -40.126747  | -2.663246  | 2.6632462 |
| 201859_at    | 5552 SRGN                    | Hs.1908   | serglycin                                   | -47.258938  | -2.7812576 | 2.7812576 |
| 201858_s_at  | 5552 SRGN                    | Hs.1908   | serglycin                                   | -70.43599   | -3.0691204 | 3.0691204 |

**Supplementary Table 2. Antibodies used in this study**

| Antibody                                  | Supplier                  | Catalogue number | Applications in this study                                                       |
|-------------------------------------------|---------------------------|------------------|----------------------------------------------------------------------------------|
| EGFR (D38B1)                              | Cell Signaling Technology | 4267             | Western blot (WB) (1: 1000 dilution)                                             |
| EGFR (EGFR.1)                             | Thermo Scientific         | MS-331           | Immunofluorescence (IF) (1: 100 dilution), Immunoprecipitation (1: 100 dilution) |
| EGFR (14C10)                              | in-house-prepared         | -                | Neutralization (Neu) (10 ug/mL)                                                  |
| Phospho-EGFR Tyr1173                      | Epitomics                 | 1124             | WB (1: 1000 dilution)                                                            |
| Phospho-EGFR Tyr845                       | Epitomics                 | 2342             | WB (1: 1000 dilution)                                                            |
| Phospho-EGFR Tyr1045                      | Cell Signaling Technology | 2237             | WB (1: 1000 dilution)                                                            |
| Phospho-EGFR Tyr1068 (D7A5)               | Cell Signaling Technology | 3777             | WB (1: 1000 dilution)                                                            |
| Phospho-EGFR Tyr1086                      | Epitomics                 | 1139             | WB (1: 1000 dilution)                                                            |
| HER2/ErbB2 (D8F12)                        | Cell Signaling Technology | 4290             | WB (1: 1000 dilution)                                                            |
| MEK1 (61B12)                              | Cell Signaling Technology | 2352             | WB (1: 1000 dilution)                                                            |
| ERK1/2 (137F5)                            | Cell Signaling Technology | 4695             | WB (1: 1000 dilution)                                                            |
| Phospho-ERK1/2 Thr202/pTyr204 (D13.14.4E) | Cell Signaling Technology | 4370             | WB (1: 1000 dilution)                                                            |
| FRA1 (N-17)                               | Santa Cruz Biotechnology  | sc-183           | WB (1: 1000 dilution)                                                            |
| Phospho-FRA1 Ser265 (D22B1)               | Cell Signaling Technology | 5841             | WB (1: 1000 dilution)                                                            |
| Akt                                       | Cell Signaling Technology | 9272             | WB (1: 1000 dilution)                                                            |
| Phospho-Akt Ser473                        | Cell Signaling Technology | 9271             | WB (1: 1000 dilution)                                                            |
| RSK1 (D6D5)                               | Cell Signaling Technology | 8408             | WB (1: 1000 dilution)                                                            |
| RSK2 (D21B2)                              | Cell Signaling Technology | 5528             | WB (1: 1000 dilution)                                                            |
| Ubiquitin (P4D1)                          | Cell Signaling Technology | 3936             | WB (1: 1000 dilution)                                                            |
| ZEB1 (D80D3)                              | Cell Signaling Technology | 3396             | WB (1: 500 dilution)                                                             |
| Snail (C15D3)                             | Cell Signaling Technology | 3879             | WB (1: 1000 dilution)                                                            |
| Slug (C19G7)                              | Cell Signaling Technology | 9585             | WB (1: 1000 dilution)                                                            |
| E-cadherin (24E10)                        | Cell Signaling Technology | 3195             | WB (1: 1000 dilution), IF (1: 200 dilution)                                      |
| E-cadherin (SHE78-7)                      | TaKaRa                    | M126             | Neu (4 ug/mL)                                                                    |
| N-cadherin                                | Cell Signaling Technology | 4061             | WB (1: 1000 dilution)                                                            |
| Vimentin (D21H3)                          | Cell Signaling Technology | 5741             | WB (1: 1000 dilution), IF (1: 200 dilution)                                      |
| Fibronectin (10/Fibronectin)              | BD Bioscience             | 610077           | WB (1: 1000 dilution)                                                            |
| Occcludin                                 | Invitrogen                | 71-1500          | WB (1: 1000 dilution)                                                            |
| Twist (Twist2C1a)                         | Abcam                     | ab50887          | WB (1: 1000 dilution)                                                            |
| Claudin-1                                 | Cell Signaling Technology | 4933             | WB (1: 1000 dilution)                                                            |

|                                    |               |          |                                        |
|------------------------------------|---------------|----------|----------------------------------------|
| beta-Actin (AC-15)                 | Sigma-Aldrich | A5441    | WB (1: 5000 dilution)                  |
| beta-Tubulin (JDR.3B8)             | Sigma-Aldrich | T8535    | WB (1: 5000 dilution)                  |
| PE anti-human EGFR (EGFR1)         | Abcam         | ab130738 | Flow Cytometry (FC) (2 uL/2E+05 cells) |
| PE mouse IgG2b, k isotype Ctrl     | BioLegend     | 400314   | FC (2 uL/2E+05 cells)                  |
| FITC anti-human CD44 (G44-26)      | BD Pharmingen | 560977   | FC (2 uL/2E+05 cells)                  |
| FITC mouse IgG2b, k isotype Ctrl   | BioLegend     | 400309   | FC (2 uL/2E+05 cells)                  |
| APC anti-human CD24 (ML5)          | BioLegend     | 311117   | FC (2 uL/2E+05 cells)                  |
| APC mouse IgG2a, k isotype Ctrl    | BioLegend     | 400219   | FC (2 uL/2E+05 cells)                  |
| APC anti-human CD326 (EpCAM) (9C4) | BioLegend     | 324207   | FC (4 uL/2E+05 cells)                  |
| APC mouse IgG2b, k isotype Ctrl    | BioLegend     | 400319   | FC (0.6 uL/2E+05 cells)                |
| FITC anti-human CD49f (GoH3)       | BD Pharmingen | 555735   | FC (2 uL/2E+05 cells)                  |
| FITC Rat IgG2a, k isotype Ctrl     | BD Pharmingen | 555843   | FC (2 uL/2E+05 cells)                  |



**Supplementary Table 3. Primers used in this study**

|              | Gene                 | Forward                             | Reverse                                       |
|--------------|----------------------|-------------------------------------|-----------------------------------------------|
| RT-qPCR      | EGFR                 | GTCTGCCATGCCTTGTGCTC                | CTTGTCCACGCATTCCCTGC                          |
|              | ErbB2                | AGCCTTGCCCCATCAACTG                 | AATGCCAACCACCGCAGA                            |
|              | ErbB3                | CCCTGCCATGAGAACTGCAC                | TCACTGTCAAAGCCATTGTCAGAT                      |
|              | ErbB4                | CCTGGAAGAAAGACGACTCGTTC             | CGTCACTCTGATGGGTGAATTTCC                      |
|              | E-cadherin           | TGCCCAGAAAATGAAAAAGG                | GTGTATGTGGCAATGCGTTC                          |
|              | N-cadherin           | ACAGTGGCCACCTACAAAGG                | CCGAGATGGGGTTGATAATG                          |
|              | ZEB1                 | GGAAAGGAAGGGCAAGAAATCCTGG           | TGGTGTGCCCTGCCTCTGGT                          |
|              | ZEB2                 | CAAGAGGCGCAAACAAGC                  | GGTTGGCAATACCGTCATCC                          |
|              | Snail                | CCTCCCTGTCAGATGAGGAC                | CCAGGCTGAGGTATTCCTTG                          |
|              | Slug                 | GGGGAGAAGCCTTTTTCTTG                | TCCTCATGTTTGTGCAGGAG                          |
|              | Twist1               | GGAGTCCGCAGTCTTACGAG                | TCTGGAGGACCTGGTAGAGG                          |
|              | Vimentin             | GAGAACTTTGCCGTTGAAGC                | GCTTCCTGTAGGTGGCAATC                          |
|              | Fibronectin 1        | CAGTGGGAGACCTCGAGAAG                | TCCCTCGGAACATCAGAAAC                          |
|              | TGF-beta1            | TGTCACCGGAGTTGTGCGGC                | GCAGTGGGCGCTAAGGCGAA                          |
|              | TGF-beta2            | ACCAACCGGCGGAAGAA                   | CACCCTAGATCCCTCTTGAAATCA                      |
|              | TGF-beta3            | AGGCCCTTGCCCATACCT                  | AGATGCTTCAGGGTTCAGAGTGTT                      |
|              | GAPDH                | CATGAGAAGTATGACAACAGCCT             | AGTCCTTCCACGATACCAAAGT                        |
| Construction | wt MEK1 cDNA cloning | TTActcgaggccaccATGCCCAAGAAGAAGCCGAC | TTAggatccTTAGACGCCAGCAGCATGGG                 |
|              | CA-MEK1 mutagenesis  | GAATTTCGTGGGCACAAGGTCCTA            | GTTGGCCATGTCGTTCGATGAGCTG                     |
|              | DN-MEK1 mutagenesis  | GCCTTCGTGGGCACAAGGTCCTA             | GTTGGCCATGGCGTCGATGAGCT                       |
|              | ZEB1 cDNA cloning    | ATACTCGAGATGGCGGATGGCCCCAGGTG       | GGCTCTAGATTAGGCTTCATTTGTCTTTTCTTCAGACACTTGCTC |

**Supplementary Table 4. siRNAs used in this study**

| Gene  | Supplier      | Catalogue number   | Sequences (sense strand)         | Descriptions/References                                 |
|-------|---------------|--------------------|----------------------------------|---------------------------------------------------------|
| ErbB2 | Dharmacon     | L-003126-00-0005   | -                                | ON-TARGETplus siRNA - SMARTpool                         |
| ErbB3 | Dharmacon     | L-003127-00-0005   | -                                | ON-TARGETplus siRNA - SMARTpool                         |
| MEK1  | Sigma-Aldrich | SASI_Hs01_00090167 | -                                | MISSION siRNA                                           |
| ERK1  | Sigma-Aldrich | Custom Products    | 5' -CGUCUAAUUAUAAAUAUAdTdT-3'    | Anjum et al, Curr Biol. 2005;15(19):1762-7.             |
| ERK2  | Sigma-Aldrich | Custom Products    | 5' -CAUGGUAGUCACUAACAUAAdTdT-3'  | Anjum et al, Curr Biol. 2005;15(19):1762-7.             |
| RSK1  | Sigma-Aldrich | Custom Products    | 5' -CCCAACAUCAUCACUCUGAAAdTdT-3' | Anjum et al, Curr Biol. 2005;15(19):1762-7.             |
| RSK2  | Sigma-Aldrich | Custom Products    | 5' -AGCGCUGAGAAUGGACAGCAAdTdT-3' | Anjum et al, Curr Biol. 2005;15(19):1762-7.             |
| FRA1  | Sigma-Aldrich | Custom Products    | 5' -CACCAUGAGUGGCAGUCAGdTdT-3'   | Vial and Marshall, J Cell Sci. 2003;116(Pt 24):4957-63. |
| ZEB1  | Sigma-Aldrich | Custom Products    | 5' -UGAUCAGCCUCAAUUCUGCAdTdT-3'  | Eger et al, Oncogene. 2005;24(14):2375-85.              |

**Supplementary Table 5. Synthetic microRNA inhibitors used in this study**

| microRNA | Supplier          | Catalogue number | Descriptions            |
|----------|-------------------|------------------|-------------------------|
| miR-200c | Life Technologies | ID:MH11714       | mirVana miRNA inhibitor |
| miR-205  | Life Technologies | ID:MH11015       | mirVana miRNA inhibitor |
